# Supplementary material for: Discovery of Human Inversion Polymorphisms by Comparative Analysis of Human and Chimpanzee DNA Sequence Assemblies
Source: PubMed Central journal article supplement (PMC1270012; doi:10.1371/journal.pgen.0010056), 2005-10-28

Figure S1. Sequence identity for putative inversions

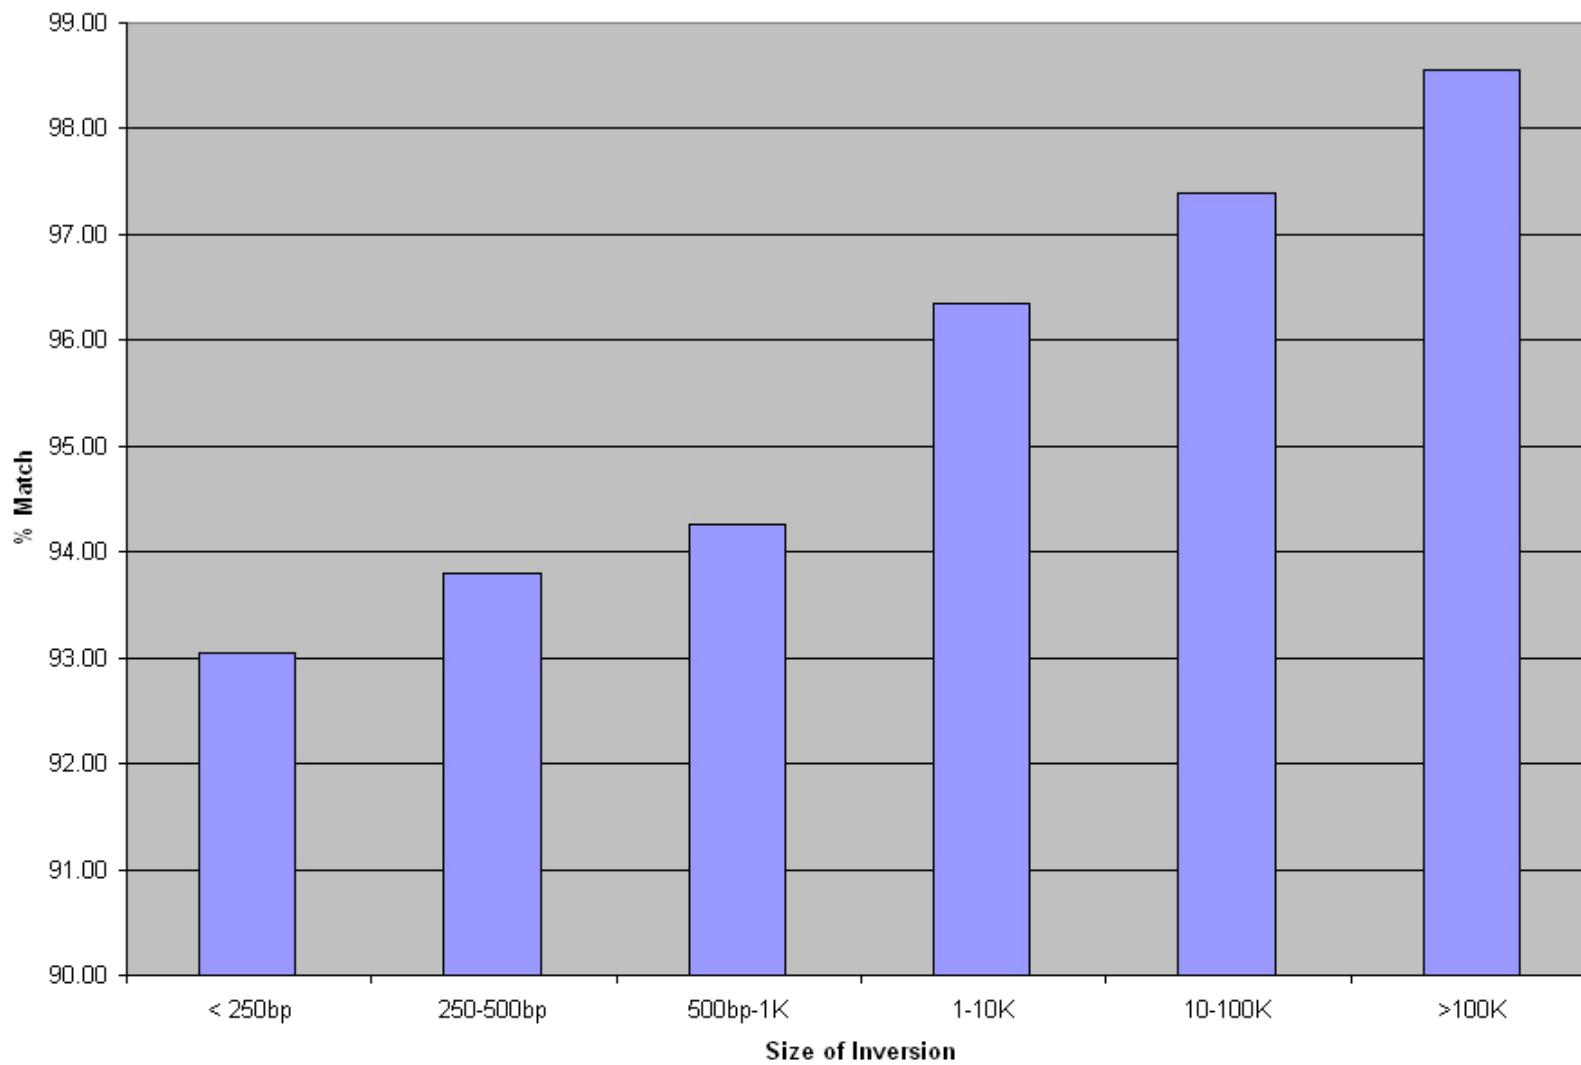

Supplement: pgen.0010056.sg001.pdf [file pgen.0010056.sg001.pdf]
