# Supplementary material for: Discovery of Human Inversion Polymorphisms by Comparative Analysis of Human and Chimpanzee DNA Sequence Assemblies
Source: PubMed Central journal article supplement (PMC1270012; doi:10.1371/journal.pgen.0010056), 2005-10-28
Supplement: pgen.0010056.st001.pdf [file pgen.0010056.st001.pdf]

| Human Chr | Human Start | Human Stop | Chimp Chr | Chimp Start | Chimp Stop | Human Length | Chimp Length | % Dup Coverage | % Repeat Coverage | % Match |
|-----------|-------------|------------|-----------|-------------|------------|--------------|--------------|----------------|-------------------|---------|
| chr5      | 34249652    | 95947182   | chr4      | 19219894    | 82959708   | 61697531     | 63739815     | 4              | 45                | 98.78   |
| chr4      | 44652593    | 65134026   | chr3      | 81507847    | 102312984  | 20481434     | 20805138     | 1              | 43                | 98.57   |
| chr4      | 73407826    | 86315437   | chr3      | 47358490    | 60327796   | 12907612     | 12969307     | 0              | 48                | 98.79   |
| chr18     | 102544      | 10913022   | chr17     | 1882009     | 12697899   | 10810479     | 10815891     | 0              | 47                | 98.63   |
| chr15     | 18313193    | 26244831   | chr16     | 20542252    | 28367385   | 7931639      | 7825134      | 34             | 50                | 98.23   |
| chr5      | 21921269    | 26652011   | chr4      | 90802394    | 95501268   | 4730743      | 4698875      | 4              | 50                | 98.45   |
| chr4      | 65139017    | 69862541   | chr3      | 76993784    | 81502838   | 4723525      | 4509055      | 11             | 51                | 98.5    |
| chr7      | 40653710    | 43664983   | chr6      | 40575221    | 43598946   | 3011274      | 3023726      | 0              | 44                | 98.87   |
| chr4      | 70542959    | 73403379   | chr3      | 60332218    | 76524041   | 2860421      | 16191824     | 2              | 47                | 98.59   |
| chr5      | 26675757    | 29483971   | chr4      | 87964410    | 90786579   | 2808215      | 2822170      | 0              | 50                | 98.42   |
| chr5      | 29491092    | 32038443   | chr4      | 85333796    | 87957541   | 2547352      | 2623746      | 0              | 48                | 98.52   |
| chr5      | 18589078    | 20807514   | chr4      | 99462132    | 101743160  | 2218437      | 2281029      | 3              | 47                | 98.58   |
| chr1      | 109938476   | 111948702  | chr1      | 110317888   | 112543951  | 2010227      | 2226064      | 1              | 46                | 98.79   |
| chr15     | 26996736    | 28489097   | chr16     | 18428715    | 20042977   | 1492362      | 1614263      | 22             | 49                | 98.61   |
| chr2      | 1589507     | 3020329    | chr12     | 1618753     | 3079857    | 1430823      | 1461105      | 0              | 35                | 98.45   |
| chr1      | 111949406   | 113371599  | chr1      | 108881401   | 110316525  | 1422194      | 1435125      | 0              | 49                | 98.88   |
| chr7      | 39358321    | 40652615   | chr6      | 43599928    | 45161662   | 1294295      | 1561735      | 4              | 50                | 98.92   |
| chr7      | 5810563     | 6518007    | chr6      | 6281602     | 6992559    | 707445       | 710958       | 1              | 55                | 98.61   |
| chr19     | 41528748    | 42208004   | chr20     | 38571492    | 39250051   | 679257       | 678560       | 3              | 65                | 98.62   |
| chr5      | 98949085    | 99410215   | chr4      | 104683812   | 105147879  | 461131       | 464068       | 1              | 49                | 98.58   |
| chr11     | 49329112    | 49785709   | chr9      | 90042647    | 90562701   | 456598       | 520055       | 90             | 50                | 97.05   |
| chr5      | 21558880    | 21920651   | chr4      | 45150549    | 45509920   | 361772       | 359372       | 0              | 46                | 98.54   |
| chr7      | 53351230    | 53704127   | chr6      | 54721836    | 55078142   | 352898       | 356307       | 0              | 55                | 98.5    |
| chr9      | 43099880    | 43447222   | chr11     | 40032800    | 40562197   | 347343       | 529398       | 82             | 40                | 97.9    |
| chr7      | 53030844    | 53337047   | chr6      | 55092324    | 55400709   | 306204       | 308386       | 0              | 48                | 98.36   |
| chr19     | 16750522    | 17003347   | chr20     | 17983388    | 18240445   | 252826       | 257058       | 0              | 59                | 98.35   |
| chr1      | 113410402   | 113655554  | chr1      | 112590603   | 112886082  | 245153       | 295480       | 0              | 54                | 98.73   |
| chr17     | 57421435    | 57660951   | chr19     | 47477836    | 47717935   | 239517       | 240100       | 12             | 57                | 98.89   |
| chr6      | 61989990    | 62185125   | chr5      | 62559950    | 62769928   | 195136       | 209979       | 35             | 71                | 97.84   |
| chr10     | 51907296    | 52095219   | chr8      | 52569883    | 52758942   | 187924       | 189060       | 5              | 40                | 99.02   |
| chr1      | 202704365   | 202875288  | chr1      | 186160249   | 186330610  | 170924       | 170362       | 16             | 48                | 98.66   |
| chr17     | 57693605    | 57850491   | chr19     | 47311420    | 47470565   | 156887       | 159146       | 27             | 53                | 98.67   |
| chr16     | 28390711    | 28545637   | chr18     | 29110008    | 29273443   | 154927       | 163436       | 11             | 58                | 98.5    |
| chr10     | 51598875    | 51753561   | chr8      | 52912725    | 53089551   | 154687       | 176827       | 46             | 46                | 98.83   |
| chr7      | 142801072   | 142942441  | chr6      | 145554696   | 145702226  | 141370       | 147531       | 89             | 53                | 98.55   |
| chr19     | 55135022    | 55260077   | chr20     | 53105203    | 53230106   | 125056       | 124904       | 0              | 59                | 98.53   |
| chr19     | 42305639    | 42425485   | chr20     | 38338869    | 38473811   | 119847       | 134943       | 0              | 56                | 98.49   |
| chrX      | 71748845    | 71860873   | chrX      | 74138760    | 74248141   | 112029       | 109382       | 0              | 61                | 99.24   |
| chr15     | 28757711    | 28855705   | chr16     | 29273235    | 29379413   | 97995        | 106179       | 78             | 56                | 97.75   |
| chr19     | 20312197    | 20398955   | chr20     | 21662741    | 21690020   | 86759        | 27280        | 0              | 77                | 88.49   |
| chr4      | 70067550    | 70142281   | chr3      | 76744159    | 76818784   | 74732        | 74626        | 22             | 58                | 98.5    |
| chrX      | 138877264   | 138950857  | chrX      | 143729418   | 143804185  | 73594        | 74768        | 0              | 55                | 98.96   |
| chr22     | 20075270    | 20146044   | chr23     | 20128104    | 20201311   | 70775        | 73208        | 78             | 45                | 98.66   |
| chr4      | 70470185    | 70538225   | chr3      | 76528781    | 76597745   | 68041        | 68965        | 36             | 49                | 98.38   |
| chr9      | 87810588    | 87878496   | chr11     | 71829384    | 71893709   | 67909        | 64326        | 0              | 67                | 98.78   |
| chrX      | 51344190    | 51410012   | chrX      | 52327911    | 52395065   | 65823        | 67155        | 0              | 80                | 99.15   |
| chr2      | 89905079    | 89970892   | chr12     | 92024252    | 92118503   | 65814        | 94252        | 79             | 42                | 98.54   |
| chr7      | 63698718    | 63762463   | chr6      | 65466545    | 65522817   | 63746        | 56273        | 8              | 64                | 88.51   |
| chr10     | 51806257    | 51866853   | chr8      | 52799416    | 52860029   | 60597        | 60614        | 0              | 31                | 99.14   |
| chr17     | 41673868    | 41733269   | chr19     | 63397185    | 63465787   | 59402        | 68603        | 88             | 51                | 98.54   |
| chr1      | 245123022   | 245181641  | chr1      | 229037924   | 229095835  | 58620        | 57912        | 58             | 38                | 97.94   |
| chr12     | 46134049    | 46191062   | chr10     | 47104355    | 47158728   | 57014        | 54374        | 0              | 58                | 98.53   |

|       |           |           |       |           |           |       |        |    |    |       |
|-------|-----------|-----------|-------|-----------|-----------|-------|--------|----|----|-------|
| chr10 | 26910848  | 26967492  | chr8  | 27544034  | 27953365  | 56645 | 409332 | 67 | 44 | 91.14 |
| chrX  | 148454375 | 148509463 | chrX  | 153671767 | 153727175 | 55089 | 55409  | 35 | 60 | 99.01 |
| chr7  | 56532805  | 56587744  | chr6  | 64229321  | 64287641  | 54940 | 58321  | 70 | 66 | 95.1  |
| chrX  | 138814002 | 138863111 | chrX  | 143818338 | 143867471 | 49110 | 49134  | 17 | 72 | 98.94 |
| chrX  | 148353791 | 148402585 | chrX  | 153781671 | 153841312 | 48795 | 59642  | 59 | 40 | 97.57 |
| chr11 | 49823370  | 49871957  | chr9  | 49376010  | 49406582  | 48588 | 30573  | 74 | 27 | 94.72 |
| chr17 | 54956779  | 55003655  | chr19 | 50169262  | 50216602  | 46877 | 47341  | 0  | 59 | 98.78 |
| chr16 | 16613986  | 16659869  | chr18 | 19070399  | 19113249  | 45884 | 42851  | 88 | 70 | 98.41 |
| chr16 | 68667028  | 68711650  | chr18 | 67338518  | 67534224  | 44623 | 195707 | 90 | 42 | 98.3  |
| chr19 | 21609852  | 21650666  | chr20 | 22641180  | 22704644  | 40815 | 63465  | 34 | 73 | 92.64 |
| chr4  | 69881467  | 69921783  | chr3  | 76967336  | 76974414  | 40317 | 7079   | 0  | 76 | 98.14 |
| chr19 | 44744970  | 44783796  | chr20 | 41790122  | 41825382  | 38827 | 35261  | 0  | 55 | 98.24 |
| chrX  | 153083454 | 153120937 | chrX  | 158419857 | 158459689 | 37484 | 39833  | 30 | 16 | 98.93 |
| chr7  | 71641035  | 71678158  | chr6  | 67690928  | 67735494  | 37124 | 44567  | 37 | 84 | 98.53 |
| chr10 | 38360042  | 38395653  | chr8  | 42945019  | 42989834  | 35612 | 44816  | 52 | 74 | 96.02 |
| chr7  | 80553522  | 80588840  | chr6  | 81781455  | 81816825  | 35319 | 35371  | 0  | 41 | 98.89 |
| chrX  | 51746841  | 51780730  | chrX  | 52830687  | 52858631  | 33890 | 27945  | 81 | 55 | 99.28 |
| chr9  | 85570782  | 85603845  | chr11 | 67670841  | 67703968  | 33064 | 33128  | 37 | 60 | 98.96 |
| chr8  | 39420536  | 39451620  | chr7  | 40814662  | 40844118  | 31085 | 29457  | 0  | 63 | 83.33 |
| chr16 | 20346250  | 20377247  | chr18 | 20925778  | 20961180  | 30998 | 35403  | 86 | 63 | 97.93 |
| chr4  | 69927072  | 69955942  | chr3  | 76930351  | 76962050  | 28871 | 31700  | 33 | 62 | 98.51 |
| chr12 | 130292239 | 130321107 | chr10 | 133831465 | 133869069 | 28869 | 37605  | 87 | 30 | 96.06 |
| chr1  | 142408093 | 142436732 | chr1  | 113013969 | 113042615 | 28640 | 28647  | 3  | 32 | 99.09 |
| chr2  | 95612830  | 95641389  | chr12 | 98601718  | 98624749  | 28560 | 23032  | 63 | 37 | 99.02 |
| chrX  | 51245702  | 51273574  | chrX  | 52468686  | 52498511  | 27873 | 29826  | 83 | 67 | 98.96 |
| chr19 | 56380306  | 56407909  | chr20 | 54051621  | 54079850  | 27604 | 28230  | 0  | 47 | 86.01 |
| chr2  | 95584615  | 95612009  | chr12 | 98625570  | 98652750  | 27395 | 27181  | 82 | 29 | 99.12 |
| chr8  | 47896328  | 47923452  | chr7  | 49477431  | 49498131  | 27125 | 20701  | 0  | 85 | 95.12 |
| chr1  | 142441814 | 142468082 | chr1  | 112982531 | 113008920 | 26269 | 26390  | 0  | 56 | 99.01 |
| chr19 | 20640153  | 20665417  | chr20 | 21485215  | 21510456  | 25265 | 25242  | 0  | 77 | 98.27 |
| chr2  | 95642238  | 95667415  | chr12 | 98575492  | 98600867  | 25178 | 25376  | 0  | 33 | 99.03 |
| chrX  | 70756169  | 70780706  | chrX  | 72972808  | 72997587  | 24538 | 24780  | 78 | 38 | 98.99 |
| chrX  | 52727950  | 52751300  | chrX  | 53772528  | 53793430  | 23351 | 20903  | 44 | 42 | 98.87 |
| chrX  | 148413013 | 148436299 | chrX  | 153746228 | 153771082 | 23287 | 24855  | 0  | 46 | 98.68 |
| chr1  | 142366261 | 142389112 | chr1  | 113063598 | 113086593 | 22852 | 22996  | 74 | 20 | 98.93 |
| chr10 | 46456036  | 46478424  | chr8  | 47442764  | 47467450  | 22389 | 24687  | 0  | 46 | 98.75 |
| chr1  | 113376859 | 113399189 | chr1  | 112897292 | 112921391 | 22331 | 24100  | 0  | 33 | 99.04 |
| chr11 | 131991442 | 132013494 | chr9  | 134162932 | 134185796 | 22053 | 22865  | 0  | 35 | 98.59 |
| chrX  | 46567039  | 46586760  | chrX  | 48143503  | 48163298  | 19722 | 19796  | 0  | 53 | 99.21 |
| chrX  | 134513047 | 134532662 | chrX  | 139362150 | 139374930 | 19616 | 12781  | 36 | 85 | 90.18 |
| chrX  | 70357459  | 70376725  | chrX  | 72625218  | 72645640  | 19267 | 20423  | 0  | 59 | 98.58 |
| chr19 | 46084464  | 46103714  | chr20 | 43232837  | 43257402  | 19251 | 24566  | 87 | 55 | 97.87 |
| chrX  | 51299840  | 51319066  | chrX  | 52420189  | 52439697  | 19227 | 19509  | 8  | 62 | 99.16 |
| chr5  | 21410252  | 21429294  | chr4  | 95992994  | 96012082  | 19043 | 19089  | 85 | 47 | 98.81 |
| chr2  | 181457577 | 181476067 | chr13 | 71255064  | 71273715  | 18491 | 18652  | 0  | 50 | 98.35 |
| chr11 | 1649113   | 1667300   | chr9  | 1780384   | 1798234   | 18188 | 17851  | 34 | 59 | 97.97 |
| chrX  | 103057725 | 103075883 | chrX  | 106442722 | 106460808 | 18159 | 18087  | 0  | 49 | 98.47 |
| chr7  | 71717423  | 71735385  | chr6  | 67633150  | 67651204  | 17963 | 18055  | 65 | 75 | 98.79 |
| chrX  | 70402015  | 70419889  | chrX  | 72552442  | 72572875  | 17875 | 20434  | 0  | 66 | 99.05 |
| chr8  | 16188127  | 16205890  | chr7  | 16940697  | 16961590  | 17764 | 20894  | 0  | 46 | 97.83 |
| chr4  | 147242947 | 147260093 | chr3  | 164494747 | 164511914 | 17147 | 17168  | 0  | 80 | 98.41 |
| chr19 | 55270935  | 55287834  | chr20 | 53242244  | 53258101  | 16900 | 15858  | 40 | 81 | 96.91 |
| chr1  | 105075590 | 105092224 | chr1  | 104130057 | 104146363 | 16635 | 16307  | 0  | 69 | 97.07 |

|       |           |           |       |           |           |       |       |    |    |       |
|-------|-----------|-----------|-------|-----------|-----------|-------|-------|----|----|-------|
| chr9  | 112932144 | 112948528 | chr11 | 97479833  | 97495489  | 16385 | 15657 | 0  | 36 | 98.33 |
| chr4  | 69980747  | 69996651  | chr3  | 76890067  | 76905858  | 15905 | 15792 | 0  | 79 | 98.55 |
| chr19 | 20682802  | 20698595  | chr20 | 21451744  | 21467653  | 15794 | 15910 | 0  | 64 | 98.15 |
| chrX  | 105311594 | 105327277 | chrX  | 108897064 | 108911994 | 15684 | 14931 | 74 | 63 | 98.74 |
| chr4  | 133410549 | 133425660 | chr3  | 150399225 | 150414438 | 15112 | 15214 | 0  | 74 | 98.65 |
| chr1  | 32551140  | 32565896  | chr1  | 33301125  | 33316277  | 14757 | 15153 | 0  | 64 | 98.17 |
| chr1  | 109923787 | 109938475 | chr1  | 112497044 | 112511796 | 14689 | 14753 | 72 | 44 | 97.71 |
| chr9  | 123818209 | 123832871 | chr11 | 108557916 | 108572680 | 14663 | 14765 | 0  | 55 | 98.75 |
| chrX  | 148523838 | 148538366 | chrX  | 153645814 | 153663264 | 14529 | 17451 | 84 | 45 | 98.52 |
| chr19 | 20415247  | 20429222  | chr20 | 21122176  | 21136112  | 13976 | 13937 | 0  | 63 | 98.74 |
| chrX  | 51230041  | 51243942  | chrX  | 52500113  | 52513970  | 13902 | 13858 | 0  | 78 | 99.08 |
| chr4  | 70408774  | 70422514  | chr3  | 76641524  | 76655605  | 13741 | 14082 | 87 | 61 | 97.92 |
| chr5  | 144513021 | 144526373 | chr4  | 151189848 | 151203168 | 13353 | 13321 | 0  | 42 | 98.82 |
| chr4  | 70422628  | 70435659  | chr3  | 76621260  | 76634279  | 13032 | 13020 | 78 | 86 | 98.41 |
| chr8  | 48378817  | 48391668  | chr7  | 49927693  | 49940672  | 12852 | 12980 | 22 | 85 | 98.9  |
| chr1  | 143744839 | 143757552 | chr1  | 127177184 | 127190652 | 12714 | 13469 | 6  | 51 | 95.66 |
| chr15 | 100145309 | 100157947 | chr16 | 99231735  | 99243659  | 12639 | 11925 | 53 | 34 | 98.3  |
| chr1  | 20597128  | 20609738  | chr1  | 20894566  | 20907019  | 12611 | 12454 | 0  | 66 | 98.54 |
| chrX  | 149242145 | 149254719 | chrX  | 154471926 | 154484543 | 12575 | 12618 | 0  | 29 | 98.3  |
| chrY  | 16439375  | 16451747  | chrY  | 17094809  | 17111452  | 12373 | 16644 | 44 | 58 | 97.72 |
| chr3  | 170088600 | 170100757 | chr2  | 173567686 | 173580049 | 12158 | 12364 | 0  | 59 | 98.21 |
| chr12 | 130402005 | 130413682 | chr10 | 133441868 | 133451600 | 11678 | 9733  | 18 | 57 | 92.47 |
| chr11 | 1882620   | 1892956   | chr9  | 2086470   | 2096796   | 10337 | 10327 | 0  | 71 | 98.14 |
| chrX  | 145589216 | 145599160 | chrX  | 150782653 | 150788554 | 9945  | 5902  | 0  | 76 | 98.2  |
| chr21 | 40320324  | 40329742  | chr22 | 40364021  | 40373719  | 9419  | 9699  | 0  | 59 | 97.32 |
| chr14 | 23327740  | 23337016  | chr15 | 22270661  | 22280363  | 9277  | 9703  | 0  | 79 | 98.35 |
| chrX  | 70734203  | 70743415  | chrX  | 73010767  | 73019521  | 9213  | 8755  | 0  | 79 | 98.58 |
| chr12 | 85744858  | 85754030  | chr10 | 87868698  | 87877955  | 9173  | 9258  | 0  | 35 | 98.9  |
| chr1  | 113669596 | 113678640 | chr1  | 112567480 | 112576558 | 9045  | 9079  | 0  | 37 | 99.06 |
| chr3  | 50902683  | 50911200  | chr2  | 52485099  | 52493604  | 8518  | 8506  | 0  | 59 | 97.81 |
| chr4  | 31374744  | 31383231  | chr3  | 31972192  | 31983043  | 8488  | 10852 | 0  | 35 | 99.04 |
| chr4  | 133402241 | 133410548 | chr3  | 150390869 | 150399111 | 8308  | 8243  | 0  | 70 | 98.88 |
| chr19 | 41514672  | 41522788  | chr20 | 39250152  | 39265706  | 8117  | 15555 | 0  | 63 | 99.1  |
| chr4  | 89204343  | 89212421  | chr3  | 105199787 | 105207803 | 8079  | 8017  | 0  | 80 | 98.03 |
| chr19 | 42426358  | 42434425  | chr20 | 38329947  | 38337996  | 8068  | 8050  | 0  | 67 | 98.64 |
| chr8  | 50529355  | 50537114  | chr7  | 52115939  | 52123686  | 7760  | 7748  | 0  | 30 | 98.48 |
| chr14 | 35454226  | 35461892  | chr15 | 34781017  | 34788613  | 7667  | 7597  | 0  | 69 | 98.44 |
| chr6  | 93505644  | 93513309  | chr5  | 95250727  | 95258373  | 7666  | 7647  | 0  | 39 | 98.3  |
| chr1  | 26649408  | 26657054  | chr1  | 27336701  | 27344650  | 7647  | 7950  | 0  | 64 | 97.93 |
| chr16 | 54379200  | 54386825  | chr18 | 48474324  | 48481793  | 7626  | 7470  | 90 | 47 | 98.44 |
| chrX  | 100673638 | 100681250 | chrX  | 103919573 | 103928360 | 7613  | 8788  | 0  | 0  | 99.33 |
| chr17 | 27445700  | 27453200  | chr19 | 30813552  | 30840797  | 7501  | 27246 | 25 | 40 | 98.56 |
| chr1  | 89526899  | 89534178  | chr1  | 88402719  | 88408721  | 7280  | 6003  | 0  | 53 | 85.71 |
| chr1  | 113689399 | 113696451 | chr1  | 112549219 | 112556726 | 7053  | 7508  | 0  | 39 | 99.12 |
| chr19 | 43960157  | 43967092  | chr20 | 40889975  | 40899409  | 6936  | 9435  | 0  | 67 | 98.57 |
| chr1  | 2523902   | 2530769   | chr1  | 2441638   | 2449022   | 6868  | 7385  | 0  | 0  | 97.99 |
| chr5  | 178996023 | 179002842 | chr4  | 186527453 | 186533885 | 6820  | 6433  | 0  | 59 | 98.43 |
| chr17 | 23183532  | 23189997  | chr19 | 26512640  | 26519113  | 6466  | 6474  | 0  | 86 | 98.92 |
| chr3  | 850688    | 857030    | chr2  | 870711    | 877143    | 6343  | 6433  | 0  | 24 | 98.04 |
| chrY  | 20591702  | 20597939  | chrY  | 21653711  | 21660689  | 6238  | 6979  | 0  | 52 | 98.27 |
| chrX  | 54951041  | 54957226  | chrX  | 56217249  | 56223146  | 6186  | 5898  | 0  | 69 | 99.01 |
| chr9  | 114294735 | 114300890 | chr11 | 98829838  | 98836015  | 6156  | 6178  | 0  | 82 | 98.7  |
| chr4  | 138000890 | 138007037 | chr3  | 155178372 | 155190586 | 6148  | 12215 | 0  | 88 | 98.19 |

|       |           |           |       |           |           |      |      |    |    |       |
|-------|-----------|-----------|-------|-----------|-----------|------|------|----|----|-------|
| chr5  | 105928549 | 105934652 | chr4  | 111817053 | 111823176 | 6104 | 6124 | 0  | 35 | 98.49 |
| chr2  | 234262677 | 234268659 | chr13 | 124989518 | 124994252 | 5983 | 4735 | 0  | 36 | 96.9  |
| chrX  | 72079036  | 72084951  | chrX  | 74274927  | 74280847  | 5916 | 5921 | 77 | 30 | 98.58 |
| chrX  | 55394598  | 55400449  | chrX  | 56747050  | 56752905  | 5852 | 5856 | 0  | 10 | 99.49 |
| chrX  | 136705671 | 136711436 | chrX  | 141372842 | 141378601 | 5766 | 5760 | 0  | 54 | 99    |
| chr8  | 145052802 | 145058531 | chr7  | 148331376 | 148337105 | 5730 | 5730 | 0  | 80 | 98.48 |
| chrX  | 153121561 | 153127182 | chrX  | 158413497 | 158419235 | 5622 | 5739 | 0  | 24 | 98.82 |
| chr13 | 81825546  | 81830859  | chr14 | 64534970  | 64540282  | 5314 | 5313 | 0  | 77 | 98.89 |
| chr10 | 27246312  | 27251604  | chr8  | 27274800  | 27279852  | 5293 | 5053 | 0  | 57 | 92.55 |
| chr10 | 36073746  | 36078907  | chr8  | 36579599  | 36584794  | 5162 | 5196 | 0  | 36 | 98.41 |
| chrX  | 48770140  | 48775268  | chrX  | 50094857  | 50100018  | 5129 | 5162 | 0  | 67 | 98.99 |
| chr14 | 39050969  | 39056010  | chr15 | 38411245  | 38416290  | 5042 | 5046 | 0  | 47 | 98.52 |
| chr3  | 167822181 | 167827208 | chr2  | 171280093 | 171285134 | 5028 | 5042 | 0  | 50 | 97.87 |
| chr14 | 63401631  | 63406567  | chr15 | 62971561  | 62976464  | 4937 | 4904 | 0  | 45 | 98.2  |
| chrX  | 44234471  | 44239382  | chrX  | 45684191  | 45689106  | 4912 | 4916 | 0  | 79 | 96.19 |
| chr11 | 123763149 | 123767999 | chr9  | 125842835 | 125847683 | 4851 | 4849 | 0  | 65 | 98.55 |
| chr3  | 195538179 | 195542939 | chr2  | 199663960 | 199668731 | 4761 | 4772 | 0  | 51 | 97.68 |
| chrX  | 101556657 | 101561388 | chrX  | 104549605 | 104554465 | 4732 | 4861 | 0  | 61 | 99.17 |
| chr4  | 166196247 | 166200976 | chr3  | 183661120 | 183664065 | 4730 | 2946 | 10 | 66 | 87.27 |
| chr3  | 160598737 | 160603447 | chr2  | 163775240 | 163780006 | 4711 | 4767 | 0  | 72 | 97.41 |
| chr19 | 41524055  | 41528747  | chr20 | 39257186  | 39261914  | 4693 | 4729 | 0  | 51 | 98.68 |
| chr5  | 101051689 | 101056216 | chr4  | 119354501 | 119359034 | 4528 | 4534 | 0  | 34 | 98.96 |
| chr7  | 39199429  | 39203939  | chr6  | 45164706  | 45169239  | 4511 | 4534 | 0  | 17 | 98.43 |
| chr7  | 123758232 | 123762662 | chr6  | 126115211 | 126119626 | 4431 | 4416 | 0  | 50 | 98.34 |
| chr4  | 134282344 | 134286773 | chr3  | 151263251 | 151267665 | 4430 | 4415 | 0  | 88 | 98.91 |
| chrX  | 153127822 | 153132095 | chrX  | 158408556 | 158412857 | 4274 | 4302 | 0  | 14 | 99.01 |
| chrX  | 75151491  | 75155615  | chrX  | 77748642  | 77752774  | 4125 | 4133 | 0  | 38 | 99.2  |
| chr21 | 38482159  | 38486280  | chr22 | 39206777  | 39209844  | 4122 | 3068 | 0  | 48 | 83.85 |
| chr19 | 51364962  | 51369039  | chr20 | 48705923  | 48710207  | 4078 | 4285 | 0  | 60 | 89.28 |
| chr5  | 105934680 | 105938726 | chr4  | 111812991 | 111817025 | 4047 | 4035 | 0  | 39 | 96.57 |
| chr15 | 86187948  | 86191937  | chr16 | 87032683  | 87036699  | 3990 | 4017 | 0  | 26 | 98.17 |
| chr19 | 43956080  | 43960021  | chr20 | 40899545  | 40903498  | 3942 | 3954 | 42 | 46 | 98.8  |
| chr10 | 5013948   | 5017874   | chr8  | 5090510   | 5094429   | 3927 | 3920 | 0  | 67 | 98.16 |
| chr2  | 8047586   | 8051501   | chr12 | 8699866   | 8703776   | 3916 | 3911 | 0  | 12 | 97.82 |
| chrY  | 8691566   | 8695410   | chrY  | 8325109   | 8329805   | 3845 | 4697 | 0  | 30 | 85.88 |
| chr19 | 48550463  | 48554156  | chr20 | 45475602  | 45479255  | 3694 | 3654 | 0  | 28 | 96.61 |
| chr16 | 73810467  | 73814151  | chr18 | 68195013  | 68198582  | 3685 | 3570 | 0  | 58 | 96.54 |
| chrX  | 145575616 | 145579299 | chrX  | 150769617 | 150773299 | 3684 | 3683 | 0  | 63 | 98.45 |
| chr4  | 70168481  | 70172151  | chr3  | 76714187  | 76717852  | 3671 | 3666 | 0  | 80 | 98.85 |
| chr10 | 124646783 | 124650417 | chr8  | 126982797 | 126987635 | 3635 | 4839 | 0  | 13 | 84.91 |
| chr6  | 30466076  | 30469665  | chr5  | 30971525  | 30974268  | 3590 | 2744 | 0  | 61 | 80.5  |
| chr2  | 138838732 | 138842320 | chr13 | 27851068  | 27854662  | 3589 | 3595 | 0  | 79 | 98.8  |
| chr9  | 17469668  | 17473208  | chr11 | 17709896  | 17712904  | 3541 | 3009 | 0  | 50 | 98.42 |
| chr11 | 13577770  | 13581277  | chr9  | 13794964  | 13798125  | 3508 | 3162 | 0  | 50 | 88.91 |
| chr19 | 20666654  | 20670128  | chr20 | 21480510  | 21483978  | 3475 | 3469 | 0  | 76 | 98.14 |
| chrX  | 47706775  | 47710211  | chrX  | 49286126  | 49289563  | 3437 | 3438 | 0  | 39 | 98.84 |
| chr16 | 54195836  | 54199127  | chr18 | 48257868  | 48261286  | 3292 | 3419 | 0  | 80 | 98.06 |
| chr10 | 124694369 | 124697641 | chr8  | 126945253 | 126947267 | 3273 | 2015 | 0  | 84 | 85.79 |
| chr19 | 42435131  | 42438387  | chr20 | 38326012  | 38329272  | 3257 | 3261 | 46 | 79 | 98.09 |
| chr20 | 45912024  | 45915219  | chr21 | 49188064  | 49191757  | 3196 | 3694 | 0  | 63 | 87.48 |
| chrX  | 55389764  | 55392909  | chrX  | 56756131  | 56759249  | 3146 | 3119 | 0  | 11 | 99.09 |
| chr22 | 22640606  | 22643598  | chr23 | 22672458  | 22675453  | 2993 | 2996 | 0  | 20 | 99.2  |
| chr6  | 161237604 | 161240514 | chr5  | 165127993 | 165135560 | 2911 | 7568 | 0  | 23 | 85.67 |

|       |           |           |       |           |           |      |       |    |    |       |
|-------|-----------|-----------|-------|-----------|-----------|------|-------|----|----|-------|
| chr7  | 8665460   | 8668362   | chr6  | 9112677   | 9115597   | 2903 | 2921  | 0  | 56 | 97.55 |
| chr4  | 43920018  | 43922902  | chr3  | 46622261  | 46625266  | 2885 | 3006  | 0  | 55 | 98.65 |
| chr4  | 190985452 | 190988265 | chr3  | 209200281 | 209203094 | 2814 | 2814  | 0  | 27 | 97.51 |
| chrX  | 145609880 | 145612689 | chrX  | 150779596 | 150782468 | 2810 | 2873  | 0  | 71 | 93.94 |
| chr9  | 135666186 | 135668942 | chr11 | 118135996 | 118139262 | 2757 | 3267  | 71 | 6  | 92.12 |
| chr3  | 43649892  | 43652606  | chr2  | 44941914  | 44944653  | 2715 | 2740  | 0  | 48 | 98.82 |
| chr14 | 24035952  | 24038656  | chr15 | 22933309  | 22936028  | 2705 | 2720  | 0  | 47 | 97.56 |
| chr19 | 23108855  | 23111530  | chr20 | 22570306  | 22571883  | 2676 | 1578  | 0  | 67 | 85.43 |
| chr4  | 181250393 | 181253025 | chr3  | 199378116 | 199380745 | 2633 | 2630  | 0  | 23 | 98.66 |
| chr19 | 11998329  | 12000934  | chr20 | 12412138  | 12414745  | 2606 | 2608  | 0  | 71 | 99.04 |
| chr1  | 2520571   | 2523162   | chr1  | 2449762   | 2452393   | 2592 | 2632  | 0  | 8  | 98.72 |
| chr12 | 41131550  | 41134133  | chr10 | 41724125  | 41726731  | 2584 | 2607  | 0  | 52 | 97.86 |
| chrX  | 71978314  | 71980895  | chrX  | 74018696  | 74021284  | 2582 | 2589  | 0  | 39 | 99.25 |
| chr5  | 177317719 | 177320282 | chr4  | 184821613 | 184824244 | 2564 | 2632  | 0  | 19 | 96.47 |
| chr6  | 69906942  | 69909500  | chr5  | 71019770  | 71022258  | 2559 | 2489  | 0  | 56 | 98.55 |
| chrX  | 53781803  | 53784266  | chrX  | 55067585  | 55069340  | 2464 | 1756  | 0  | 68 | 94.72 |
| chr10 | 93193325  | 93195766  | chr8  | 94916473  | 94918921  | 2442 | 2449  | 0  | 29 | 99.14 |
| chr12 | 121450986 | 121453340 | chr10 | 124522273 | 124524645 | 2355 | 2373  | 0  | 88 | 96.15 |
| chr3  | 54167662  | 54169999  | chr2  | 55817738  | 55820077  | 2338 | 2340  | 0  | 58 | 98.55 |
| chr6  | 107275246 | 107277570 | chr5  | 109436576 | 109438923 | 2325 | 2348  | 0  | 49 | 98.15 |
| chr4  | 70197928  | 70200236  | chr3  | 76696390  | 76698658  | 2309 | 2269  | 0  | 35 | 98.38 |
| chr2  | 119669804 | 119672106 | chr13 | 5691849   | 5694536   | 2303 | 2688  | 0  | 2  | 97.7  |
| chr21 | 17343291  | 17345441  | chr22 | 17425394  | 17449830  | 2151 | 24437 | 0  | 41 | 98.92 |
| chr15 | 43014785  | 43016933  | chr16 | 42960648  | 42962818  | 2149 | 2171  | 0  | 62 | 96.58 |
| chr1  | 142486281 | 142488390 | chr1  | 112961468 | 112964330 | 2110 | 2863  | 0  | 64 | 98.67 |
| chr1  | 20619586  | 20621685  | chr1  | 20881595  | 20883691  | 2100 | 2097  | 0  | 73 | 98.52 |
| chrX  | 17552667  | 17554760  | chrX  | 18616109  | 18618932  | 2094 | 2824  | 0  | 0  | 96.83 |
| chr15 | 35356147  | 35358235  | chr16 | 35161576  | 35163671  | 2089 | 2096  | 0  | 78 | 97.56 |
| chr17 | 18867887  | 18869894  | chr19 | 19361772  | 19363349  | 2008 | 1578  | 33 | 37 | 98.42 |
| chr1  | 20611728  | 20613661  | chr1  | 20890637  | 20892572  | 1934 | 1936  | 0  | 86 | 98.6  |
| chr19 | 51390639  | 51392571  | chr20 | 48729825  | 48732485  | 1933 | 2661  | 0  | 0  | 89.97 |
| chr1  | 228706837 | 228708743 | chr1  | 212566406 | 212566832 | 1907 | 427   | 0  | 3  | 93.61 |
| chr8  | 6142792   | 6144697   | chr7  | 6356679   | 6358566   | 1906 | 1888  | 0  | 67 | 96.81 |
| chr6  | 93513346  | 93515235  | chr5  | 95248807  | 95250690  | 1890 | 1884  | 0  | 43 | 98.14 |
| chr5  | 163306621 | 163308503 | chr4  | 170366078 | 170367949 | 1883 | 1872  | 0  | 0  | 89.48 |
| chrX  | 50725645  | 50727489  | chrX  | 51727046  | 51728266  | 1845 | 1221  | 0  | 63 | 89.38 |
| chr10 | 58276526  | 58278360  | chr8  | 59191962  | 59193795  | 1835 | 1834  | 0  | 75 | 98.58 |
| chr4  | 69877633  | 69879425  | chr3  | 76976450  | 76978240  | 1793 | 1791  | 0  | 26 | 98.99 |
| chr19 | 15646185  | 15647967  | chr20 | 16454643  | 16456353  | 1783 | 1711  | 0  | 38 | 90.58 |
| chrX  | 50616684  | 50618452  | chrX  | 51836086  | 51837205  | 1769 | 1120  | 0  | 37 | 91.89 |
| chr18 | 12050572  | 12052337  | chr17 | 1862683   | 1864985   | 1766 | 2303  | 0  | 70 | 85.58 |
| chr12 | 39673826  | 39675585  | chr10 | 40258707  | 40260465  | 1760 | 1759  | 0  | 13 | 99.2  |
| chr19 | 43967231  | 43968946  | chr20 | 40888114  | 40889836  | 1716 | 1723  | 0  | 80 | 98.82 |
| chr22 | 16986339  | 16988050  | chr23 | 16912130  | 16913845  | 1712 | 1716  | 0  | 13 | 98.71 |
| chr5  | 117519850 | 117521552 | chr4  | 123722606 | 123724342 | 1703 | 1737  | 0  | 1  | 98.77 |
| chr19 | 15662068  | 15663746  | chr20 | 16440943  | 16442657  | 1679 | 1715  | 0  | 60 | 88.9  |
| chr19 | 20583565  | 20585228  | chr20 | 21565703  | 21567382  | 1664 | 1680  | 0  | 68 | 98.54 |
| chr2  | 138836410 | 138838064 | chr13 | 27855331  | 27856983  | 1655 | 1653  | 0  | 20 | 99.03 |
| chr3  | 44513014  | 44514618  | chr2  | 45877198  | 45878616  | 1605 | 1419  | 21 | 37 | 84.13 |
| chr17 | 11790717  | 11792297  | chr19 | 12142940  | 12144547  | 1581 | 1608  | 0  | 38 | 98.02 |
| chrX  | 122657933 | 122659508 | chrX  | 126789932 | 126791508 | 1576 | 1577  | 0  | 31 | 98.85 |
| chr9  | 19154498  | 19156068  | chr11 | 19434225  | 19435764  | 1571 | 1540  | 0  | 82 | 87.58 |
| chr1  | 236481630 | 236483191 | chr1  | 220405601 | 220406860 | 1562 | 1260  | 0  | 31 | 93.62 |

|       |           |           |       |           |           |      |       |   |    |       |
|-------|-----------|-----------|-------|-----------|-----------|------|-------|---|----|-------|
| chr12 | 85743314  | 85744837  | chr10 | 87877976  | 87879498  | 1524 | 1523  | 0 | 66 | 97.37 |
| chr12 | 65800790  | 65802309  | chr10 | 67370700  | 67372220  | 1520 | 1521  | 0 | 51 | 99.14 |
| chr19 | 52997650  | 52999148  | chr20 | 50375200  | 50376746  | 1499 | 1547  | 0 | 20 | 95.07 |
| chrX  | 101977738 | 101979227 | chrX  | 105492838 | 105495459 | 1490 | 2622  | 0 | 21 | 82.27 |
| chr2  | 35422484  | 35423968  | chr12 | 36837336  | 36838807  | 1485 | 1472  | 0 | 12 | 98.5  |
| chrX  | 148436346 | 148437797 | chrX  | 153751620 | 153753069 | 1452 | 1450  | 0 | 5  | 98.83 |
| chr1  | 42500345  | 42501792  | chr1  | 43470748  | 43472204  | 1448 | 1457  | 0 | 60 | 97.36 |
| chr19 | 55132132  | 55133579  | chr20 | 53231566  | 53233002  | 1448 | 1437  | 0 | 58 | 99.02 |
| chr19 | 39847214  | 39848657  | chr20 | 36322909  | 36324373  | 1444 | 1465  | 0 | 2  | 90.74 |
| chr3  | 178384355 | 178385788 | chr2  | 182107531 | 182108971 | 1434 | 1441  | 0 | 23 | 99.3  |
| chr1  | 20593108  | 20594513  | chr1  | 20910458  | 20911857  | 1406 | 1400  | 0 | 52 | 99.28 |
| chr21 | 22313574  | 22314972  | chr22 | 22481936  | 22483438  | 1399 | 1503  | 0 | 43 | 98.99 |
| chr4  | 43049696  | 43051071  | chr3  | 45740992  | 45742361  | 1376 | 1370  | 0 | 0  | 98.1  |
| chr20 | 8780741   | 8782086   | chr21 | 8669530   | 8670868   | 1346 | 1339  | 0 | 14 | 99.03 |
| chr21 | 42433458  | 42434800  | chr22 | 42562887  | 42564232  | 1343 | 1346  | 0 | 23 | 96.95 |
| chrX  | 5996786   | 5998120   | chrX  | 5963218   | 5964519   | 1335 | 1302  | 0 | 36 | 98.3  |
| chr16 | 73798542  | 73799861  | chr18 | 68209247  | 68210563  | 1320 | 1317  | 0 | 29 | 97.87 |
| chrX  | 51340855  | 51342167  | chrX  | 52397088  | 52398400  | 1313 | 1313  | 0 | 42 | 99.54 |
| chr1  | 142482538 | 142483844 | chr1  | 112966767 | 112968075 | 1307 | 1309  | 0 | 62 | 98.31 |
| chr1  | 113406945 | 113408237 | chr1  | 112888249 | 112889536 | 1293 | 1288  | 0 | 70 | 98.21 |
| chr20 | 23516575  | 23517866  | chr21 | 23770611  | 23771915  | 1292 | 1305  | 0 | 0  | 85.47 |
| chrX  | 77257875  | 77259166  | chrX  | 79754957  | 79756244  | 1292 | 1288  | 0 | 2  | 99.15 |
| chrX  | 132676327 | 132677618 | chrX  | 137272334 | 137273618 | 1292 | 1285  | 0 | 1  | 98.99 |
| chr9  | 5360131   | 5361421   | chr11 | 5308435   | 5309722   | 1291 | 1288  | 0 | 8  | 98.68 |
| chr6  | 30476387  | 30477665  | chr5  | 30951880  | 30954861  | 1279 | 2982  | 0 | 56 | 88.93 |
| chr8  | 85236924  | 85238196  | chr7  | 87370891  | 87372158  | 1273 | 1268  | 0 | 24 | 98.26 |
| chr3  | 23974135  | 23975374  | chr2  | 24909988  | 24911228  | 1240 | 1241  | 0 | 48 | 95.94 |
| chr11 | 61765324  | 61766547  | chr9  | 62801914  | 62803137  | 1224 | 1224  | 0 | 0  | 88.11 |
| chr2  | 214473644 | 214474859 | chr13 | 102674243 | 102675479 | 1216 | 1237  | 0 | 30 | 97.03 |
| chr4  | 70194502  | 70195711  | chr3  | 76705455  | 76706658  | 1210 | 1204  | 0 | 18 | 98.34 |
| chr16 | 27123565  | 27124770  | chr18 | 27822253  | 27823457  | 1206 | 1205  | 0 | 49 | 97    |
| chr9  | 31418405  | 31419607  | chr11 | 31890619  | 31891827  | 1203 | 1209  | 0 | 12 | 98.84 |
| chr7  | 135739254 | 135740427 | chr6  | 138451212 | 138452390 | 1174 | 1179  | 0 | 38 | 97.96 |
| chr2  | 53127408  | 53128580  | chr12 | 54962838  | 54964010  | 1173 | 1173  | 0 | 86 | 96.42 |
| chr5  | 134526443 | 134527612 | chr4  | 140874970 | 140876141 | 1170 | 1172  | 0 | 10 | 99.06 |
| chr2  | 237048672 | 237049835 | chr13 | 127906469 | 127907567 | 1164 | 1099  | 0 | 48 | 94.9  |
| chrX  | 133910378 | 133911529 | chrX  | 138507956 | 138509091 | 1152 | 1136  | 0 | 0  | 90.72 |
| chr2  | 82061054  | 82062191  | chr12 | 84887797  | 84888936  | 1138 | 1140  | 0 | 10 | 98.95 |
| chr9  | 103014613 | 103015746 | chr11 | 87275547  | 87276660  | 1134 | 1114  | 0 | 16 | 98.64 |
| chr7  | 5055820   | 5056938   | chr6  | 5477080   | 5478198   | 1119 | 1119  | 0 | 0  | 98.66 |
| chr18 | 44758819  | 44759933  | chr17 | 41043454  | 41044653  | 1115 | 1200  | 0 | 27 | 96.68 |
| chrX  | 51841203  | 51842317  | chrX  | 53123250  | 53124362  | 1115 | 1113  | 0 | 0  | 91.7  |
| chr22 | 22912447  | 22913559  | chr23 | 21100845  | 21101996  | 1113 | 1152  | 0 | 79 | 93.15 |
| chrX  | 105328722 | 105329830 | chrX  | 108893936 | 108895043 | 1109 | 1108  | 0 | 0  | 99.1  |
| chrX  | 125636238 | 125637345 | chrX  | 129825662 | 129826737 | 1108 | 1076  | 0 | 87 | 93.8  |
| chr9  | 87519145  | 87520242  | chr11 | 71697247  | 71698390  | 1098 | 1144  | 0 | 57 | 91.17 |
| chr2  | 192911245 | 192912333 | chr13 | 82807288  | 82808378  | 1089 | 1091  | 0 | 40 | 99.26 |
| chrX  | 42859196  | 42860277  | chrX  | 70002508  | 70003589  | 1082 | 1082  | 0 | 65 | 98.8  |
| chrX  | 50643284  | 50644353  | chrX  | 51804621  | 51805697  | 1070 | 1077  | 0 | 79 | 88.08 |
| chr1  | 23014231  | 23015295  | chr1  | 23370907  | 23371971  | 1065 | 1065  | 0 | 6  | 98.59 |
| chr2  | 175410035 | 175411087 | chr13 | 41945350  | 41946403  | 1053 | 1054  | 0 | 5  | 100   |
| chr9  | 107780931 | 107781972 | chr11 | 92305187  | 92306229  | 1042 | 1043  | 0 | 58 | 98.75 |
| chrX  | 148313005 | 148314039 | chrX  | 153475678 | 153490667 | 1035 | 14990 | 0 | 0  | 97.42 |

|       |           |           |       |           |           |      |      |    |    |       |
|-------|-----------|-----------|-------|-----------|-----------|------|------|----|----|-------|
| chr4  | 175268525 | 175269557 | chr3  | 193246142 | 193247187 | 1033 | 1046 | 0  | 53 | 98.55 |
| chr5  | 180456457 | 180457482 | chr4  | 187984873 | 187985889 | 1026 | 1017 | 0  | 14 | 98.62 |
| chr6  | 168911261 | 168912284 | chr5  | 173379136 | 173380147 | 1024 | 1012 | 0  | 63 | 98.22 |
| chr14 | 94477163  | 94478182  | chr15 | 94914132  | 94915213  | 1020 | 1082 | 0  | 55 | 98.81 |
| chr19 | 20680643  | 20681661  | chr20 | 21468782  | 21469808  | 1019 | 1027 | 0  | 81 | 97.84 |
| chr19 | 39760015  | 39761030  | chr20 | 36419531  | 36420522  | 1016 | 992  | 0  | 0  | 84.8  |
| chr4  | 70158092  | 70159099  | chr3  | 76727244  | 76728260  | 1008 | 1017 | 0  | 55 | 98.61 |
| chr20 | 1598295   | 1599301   | chr21 | 1845811   | 1846807   | 1007 | 997  | 0  | 8  | 87.14 |
| chr7  | 148523227 | 148524222 | chr6  | 151385191 | 151386178 | 996  | 988  | 0  | 85 | 97.45 |
| chr19 | 39775373  | 39776354  | chr20 | 36399224  | 36399903  | 982  | 680  | 0  | 25 | 88.76 |
| chr11 | 61619092  | 61620071  | chr9  | 62603599  | 62604579  | 980  | 981  | 0  | 69 | 97.33 |
| chr9  | 133146111 | 133147089 | chr11 | 118008080 | 118009063 | 979  | 984  | 0  | 61 | 97.85 |
| chr1  | 2517646   | 2518621   | chr1  | 2454344   | 2455299   | 976  | 956  | 0  | 43 | 99.16 |
| chr14 | 66935373  | 66936348  | chr15 | 66553854  | 66554204  | 976  | 351  | 0  | 20 | 98.01 |
| chr20 | 38710454  | 38711422  | chr21 | 41136679  | 41137670  | 969  | 992  | 0  | 16 | 98.38 |
| chr14 | 94557546  | 94558514  | chr15 | 94995463  | 94996432  | 969  | 970  | 0  | 77 | 98.86 |
| chr13 | 19430565  | 19431526  | chr14 | 18219844  | 18220874  | 962  | 1031 | 0  | 33 | 87.78 |
| chr8  | 145115791 | 145116751 | chr7  | 148393731 | 148394687 | 961  | 957  | 0  | 7  | 98.43 |
| chrX  | 102275896 | 102276842 | chrX  | 105868443 | 105869365 | 947  | 923  | 0  | 13 | 88.13 |
| chr11 | 4492776   | 4493717   | chr9  | 4615851   | 4616760   | 942  | 910  | 0  | 0  | 82.33 |
| chr21 | 17267126  | 17268064  | chr22 | 17345197  | 17346140  | 939  | 944  | 0  | 85 | 94    |
| chr19 | 21362225  | 21363162  | chr20 | 22248847  | 22250431  | 938  | 1585 | 0  | 0  | 85.06 |
| chrX  | 50897515  | 50898440  | chrX  | 52206357  | 52207258  | 926  | 902  | 65 | 77 | 97.22 |
| chr9  | 15476003  | 15476928  | chr11 | 15256631  | 15256798  | 926  | 168  | 0  | 6  | 96.43 |
| chr11 | 308357    | 309275    | chr9  | 354244    | 354986    | 919  | 743  | 0  | 2  | 98.65 |
| chr13 | 64757212  | 64758128  | chr14 | 47119465  | 47120381  | 917  | 917  | 0  | 77 | 98.91 |
| chr7  | 143894744 | 143895647 | chr6  | 146520226 | 146521133 | 904  | 908  | 0  | 9  | 98.67 |
| chr19 | 15778916  | 15779816  | chr20 | 16405993  | 16406893  | 901  | 901  | 0  | 0  | 92.45 |
| chr10 | 65888978  | 65889873  | chr8  | 66900624  | 66901508  | 896  | 885  | 0  | 38 | 97.4  |
| chr2  | 242226139 | 242227030 | chr13 | 133702783 | 133703688 | 892  | 906  | 0  | 62 | 98.21 |
| chr19 | 49483555  | 49484446  | chr20 | 46556375  | 46557179  | 892  | 805  | 0  | 0  | 82.21 |
| chr16 | 72921348  | 72922230  | chr18 | 63092101  | 63092982  | 883  | 882  | 0  | 65 | 98.97 |
| chr19 | 20601946  | 20602824  | chr20 | 21547786  | 21548666  | 879  | 881  | 0  | 84 | 98.75 |
| chr4  | 117391316 | 117392194 | chr3  | 134058500 | 134058973 | 879  | 474  | 0  | 74 | 99.58 |
| chr10 | 133302133 | 133303009 | chr8  | 136046554 | 136047425 | 877  | 872  | 0  | 19 | 98.39 |
| chr8  | 55613319  | 55614194  | chr7  | 57299108  | 57299992  | 876  | 885  | 0  | 88 | 96.8  |
| chr9  | 34952614  | 34953488  | chr11 | 35406987  | 35407874  | 875  | 888  | 0  | 0  | 84.9  |
| chr6  | 31117202  | 31118074  | chr5  | 31581562  | 31582432  | 873  | 871  | 0  | 47 | 98.74 |
| chr11 | 61622672  | 61623543  | chr9  | 62601314  | 62602182  | 872  | 869  | 0  | 66 | 98.85 |
| chr16 | 73797610  | 73798480  | chr18 | 68210625  | 68211494  | 871  | 870  | 0  | 14 | 98.74 |
| chrX  | 148410169 | 148411021 | chrX  | 153773074 | 153773922 | 853  | 849  | 0  | 60 | 98.82 |
| chrX  | 149179675 | 149180515 | chrX  | 154280488 | 154281328 | 841  | 841  | 0  | 12 | 98.93 |
| chr2  | 130868096 | 130868934 | chr13 | 17014885  | 17015726  | 839  | 842  | 0  | 71 | 94.07 |
| chr19 | 47855875  | 47856711  | chr20 | 44682866  | 44683699  | 837  | 834  | 0  | 61 | 84.36 |
| chr5  | 168469975 | 168470808 | chr4  | 175713416 | 175714249 | 834  | 834  | 0  | 86 | 98.92 |
| chr9  | 137256234 | 137257064 | chr11 | 122077005 | 122077828 | 831  | 824  | 0  | 3  | 89.79 |
| chrX  | 123039324 | 123040153 | chrX  | 127153198 | 127154021 | 830  | 824  | 0  | 34 | 96.24 |
| chr2  | 174361466 | 174362294 | chr13 | 63999556  | 64005200  | 829  | 5645 | 0  | 76 | 98.93 |
| chr11 | 59859223  | 59860050  | chr9  | 60608080  | 60608914  | 828  | 835  | 0  | 29 | 93.77 |
| chr4  | 173209827 | 173210652 | chr3  | 191148500 | 191149317 | 826  | 818  | 0  | 37 | 98.29 |
| chr12 | 39557826  | 39558649  | chr10 | 40145243  | 40146067  | 824  | 825  | 0  | 37 | 97.32 |
| chrX  | 140489952 | 140490769 | chrX  | 144461907 | 144462727 | 818  | 821  | 0  | 36 | 98.66 |
| chr16 | 25005168  | 25005984  | chr18 | 25714020  | 25714524  | 817  | 505  | 0  | 47 | 83.09 |

|       |           |           |       |           |           |     |      |   |    |       |
|-------|-----------|-----------|-------|-----------|-----------|-----|------|---|----|-------|
| chr4  | 70019362  | 70020177  | chr3  | 76866451  | 76867266  | 816 | 816  | 0 | 0  | 98.77 |
| chr12 | 7701754   | 7702567   | chr10 | 8258688   | 8259636   | 814 | 949  | 0 | 46 | 93.64 |
| chr9  | 30298832  | 30299643  | chr11 | 30769125  | 30769933  | 812 | 809  | 0 | 75 | 98.39 |
| chr19 | 7742484   | 7743291   | chr20 | 8051718   | 8052207   | 808 | 490  | 0 | 60 | 82.56 |
| chr11 | 104607594 | 104608398 | chr9  | 106545199 | 106545996 | 805 | 798  | 0 | 25 | 99.12 |
| chr19 | 23119367  | 23120168  | chr20 | 22560799  | 22561614  | 802 | 816  | 0 | 0  | 83.46 |
| chrX  | 51071273  | 51072073  | chrX  | 52029082  | 52029853  | 801 | 772  | 0 | 0  | 97.25 |
| chrX  | 148274716 | 148275515 | chrX  | 153514651 | 153515455 | 800 | 805  | 0 | 0  | 96.11 |
| chr8  | 23042799  | 23043597  | chr7  | 23985543  | 23986330  | 799 | 788  | 0 | 0  | 85.31 |
| chr20 | 45919641  | 45920431  | chr21 | 49185704  | 49186492  | 791 | 789  | 0 | 0  | 90.6  |
| chr2  | 20355597  | 20356371  | chr12 | 21140865  | 21141656  | 775 | 792  | 0 | 84 | 93.53 |
| chr9  | 87665459  | 87666227  | chr11 | 71572419  | 71577589  | 769 | 5171 | 0 | 0  | 82.2  |
| chr11 | 87850908  | 87851661  | chr9  | 89685364  | 89686117  | 754 | 754  | 0 | 11 | 98.54 |
| chr1  | 177547542 | 177548294 | chr1  | 159917213 | 159917967 | 753 | 755  | 0 | 9  | 98.27 |
| chr2  | 41106315  | 41107062  | chr12 | 42653964  | 42654711  | 748 | 748  | 0 | 4  | 97.86 |
| chr3  | 127330608 | 127331354 | chr2  | 129131913 | 129132654 | 747 | 742  | 0 | 8  | 89.66 |
| chr9  | 21420772  | 21421513  | chr11 | 21592301  | 21595292  | 742 | 2992 | 0 | 38 | 81.8  |
| chr19 | 39915066  | 39915806  | chr20 | 36341485  | 36342252  | 741 | 768  | 0 | 0  | 91.6  |
| chr6  | 107528818 | 107529558 | chr5  | 109861956 | 109862620 | 741 | 665  | 0 | 40 | 91.91 |
| chrX  | 56208622  | 56209356  | chrX  | 57646819  | 57647547  | 735 | 729  | 0 | 88 | 95.2  |
| chr16 | 26256602  | 26257334  | chr18 | 26943685  | 26944418  | 733 | 734  | 0 | 64 | 97.68 |
| chr7  | 6518064   | 6518796   | chr6  | 6280820   | 6281545   | 733 | 726  | 0 | 34 | 98.62 |
| chr14 | 105386613 | 105387344 | chr15 | 106045932 | 106046668 | 732 | 737  | 0 | 50 | 93.7  |
| chr8  | 39469670  | 39470400  | chr7  | 40809955  | 40810677  | 731 | 723  | 0 | 0  | 82.24 |
| chr11 | 4932615   | 4933344   | chr9  | 4906066   | 4906795   | 730 | 730  | 0 | 0  | 77.5  |
| chr14 | 28831277  | 28831999  | chr15 | 27783038  | 27783761  | 723 | 724  | 0 | 19 | 98.06 |
| chr7  | 88160264  | 88160978  | chr6  | 89680017  | 89684121  | 715 | 4105 | 0 | 20 | 99.16 |
| chrX  | 133494739 | 133495442 | chrX  | 138110598 | 138110991 | 704 | 394  | 0 | 43 | 88.3  |
| chr1  | 29632006  | 29632704  | chr1  | 30060652  | 30068234  | 699 | 7583 | 0 | 23 | 85.71 |
| chrX  | 149053455 | 149054148 | chrX  | 154409263 | 154409954 | 694 | 692  | 0 | 11 | 98.84 |
| chr1  | 50850962  | 50851648  | chr1  | 49056437  | 49057120  | 687 | 684  | 0 | 32 | 99.71 |
| chr22 | 16133235  | 16133912  | chr23 | 15992708  | 15993362  | 678 | 655  | 0 | 64 | 98.31 |
| chr19 | 4581952   | 4582625   | chr20 | 4859346   | 4860029   | 674 | 684  | 0 | 57 | 97.77 |
| chr19 | 48561107  | 48561780  | chr20 | 45468214  | 45468887  | 674 | 674  | 0 | 24 | 98.07 |
| chr19 | 39762650  | 39763318  | chr20 | 36484855  | 36485502  | 669 | 648  | 0 | 14 | 89.66 |
| chr3  | 21507165  | 21507828  | chr2  | 22380622  | 22381284  | 664 | 663  | 0 | 9  | 99.4  |
| chr16 | 83746447  | 83747108  | chr18 | 78663196  | 78663857  | 662 | 662  | 0 | 60 | 98.04 |
| chr6  | 12540016  | 12540664  | chr5  | 12826567  | 12827216  | 649 | 650  | 0 | 0  | 99.69 |
| chr20 | 48820872  | 48821519  | chr21 | 51424639  | 51424988  | 648 | 350  | 0 | 45 | 94.94 |
| chr2  | 206896229 | 206896875 | chr13 | 96974576  | 96975549  | 647 | 974  | 0 | 0  | 87.42 |
| chr2  | 226241151 | 226241794 | chr13 | 116825868 | 116826511 | 644 | 644  | 0 | 67 | 99.07 |
| chr19 | 50319923  | 50320566  | chr20 | 47462106  | 47462731  | 644 | 626  | 0 | 87 | 93.54 |
| chrX  | 139228512 | 139229153 | chrX  | 144064363 | 144065004 | 642 | 642  | 0 | 57 | 99.53 |
| chrX  | 35628122  | 35628762  | chrX  | 36913476  | 36914076  | 641 | 601  | 0 | 27 | 78.4  |
| chrX  | 54740383  | 54741017  | chrX  | 55952712  | 55953347  | 635 | 636  | 0 | 81 | 90.73 |
| chrX  | 102258650 | 102259279 | chrX  | 105707468 | 105708125 | 630 | 658  | 0 | 9  | 81.69 |
| chr7  | 65058616  | 65059243  | chr6  | 66708970  | 66709597  | 628 | 628  | 0 | 47 | 91.49 |
| chr11 | 61722274  | 61722900  | chr9  | 62796340  | 62796980  | 627 | 641  | 0 | 12 | 83.19 |
| chr21 | 30719647  | 30720273  | chr22 | 30712779  | 30713402  | 627 | 624  | 0 | 0  | 84.72 |
| chr6  | 11122489  | 11123113  | chr5  | 11396064  | 11396682  | 625 | 619  | 0 | 37 | 98.87 |
| chr6  | 74035883  | 74036505  | chr5  | 75163638  | 75164269  | 623 | 632  | 0 | 65 | 95.92 |
| chr19 | 45681085  | 45681705  | chr20 | 42639738  | 42640355  | 621 | 618  | 0 | 34 | 98.54 |
| chrX  | 106281035 | 106281653 | chrX  | 109849495 | 109849793 | 619 | 299  | 0 | 49 | 88.51 |



|       |           |           |       |           |           |     |      |   |    |       |
|-------|-----------|-----------|-------|-----------|-----------|-----|------|---|----|-------|
| chr20 | 10736465  | 10737082  | chr21 | 10614467  | 10615084  | 618 | 618  | 0 | 53 | 97.73 |
| chr6  | 72090380  | 72090993  | chr5  | 73222667  | 73223297  | 614 | 631  | 0 | 14 | 96.91 |
| chr11 | 7755655   | 7756268   | chr9  | 7874772   | 7875385   | 614 | 614  | 0 | 70 | 98.53 |
| chr11 | 94180520  | 94181130  | chr9  | 96105884  | 96106483  | 611 | 600  | 0 | 55 | 98.5  |
| chr10 | 11532239  | 11532846  | chr8  | 11672638  | 11673245  | 608 | 608  | 0 | 26 | 98.85 |
| chrX  | 51839463  | 51840066  | chrX  | 53125653  | 53126252  | 604 | 600  | 0 | 41 | 89.33 |
| chr12 | 110828113 | 110828713 | chr10 | 113454836 | 113455441 | 601 | 606  | 0 | 0  | 99.5  |
| chr3  | 96465140  | 96465739  | chr2  | 97543169  | 97544452  | 600 | 1284 | 0 | 41 | 99    |
| chr10 | 80762191  | 80762786  | chr8  | 82159759  | 82160360  | 596 | 602  | 0 | 78 | 98.15 |
| chr19 | 51235299  | 51235892  | chr20 | 48669814  | 48670379  | 594 | 566  | 0 | 0  | 81.72 |
| chr6  | 108138043 | 108138632 | chr5  | 110446950 | 110447538 | 590 | 589  | 0 | 40 | 99.15 |
| chr4  | 69970449  | 69971035  | chr3  | 76915217  | 76915803  | 587 | 587  | 0 | 0  | 98.64 |
| chr4  | 117721769 | 117722355 | chr3  | 134376569 | 134377147 | 587 | 579  | 0 | 14 | 98.96 |
| chr19 | 39846637  | 39847213  | chr20 | 36343053  | 36343997  | 577 | 945  | 0 | 2  | 87.48 |
| chr7  | 49798764  | 49799340  | chr6  | 51428289  | 51428875  | 577 | 587  | 0 | 82 | 92.04 |
| chr14 | 57164584  | 57165157  | chr15 | 56633946  | 56634516  | 574 | 571  | 0 | 64 | 99.3  |
| chr13 | 66797282  | 66797854  | chr14 | 49195163  | 49195735  | 573 | 573  | 0 | 50 | 98.78 |
| chr14 | 49283221  | 49283784  | chr15 | 48685252  | 48685956  | 564 | 705  | 0 | 53 | 97.1  |
| chr21 | 18911765  | 18912327  | chr22 | 19027124  | 19027393  | 563 | 270  | 0 | 0  | 95.51 |
| chr12 | 53822381  | 53822940  | chr10 | 55092819  | 55093378  | 560 | 560  | 0 | 6  | 97.5  |
| chr22 | 43583047  | 43583605  | chr23 | 43885379  | 43885938  | 559 | 560  | 0 | 65 | 95.78 |
| chr8  | 9113380   | 9113934   | chr7  | 9738879   | 9739454   | 555 | 576  | 0 | 64 | 98.37 |
| chr4  | 94962348  | 94962902  | chr3  | 111194246 | 111194786 | 555 | 541  | 0 | 27 | 92.21 |
| chr13 | 103550518 | 103551071 | chr14 | 86946211  | 86946772  | 554 | 562  | 0 | 0  | 97.83 |
| chr3  | 177960921 | 177961474 | chr2  | 181677532 | 181678022 | 554 | 491  | 0 | 56 | 97.35 |
| chrX  | 41124130  | 41124681  | chrX  | 42431748  | 42432299  | 552 | 552  | 0 | 58 | 97.1  |
| chr1  | 2519272   | 2519822   | chr1  | 2453143   | 2453693   | 551 | 551  | 0 | 79 | 98.19 |
| chr21 | 26296030  | 26296571  | chr22 | 26291208  | 26291749  | 542 | 542  | 0 | 0  | 98.89 |
| chr2  | 233255894 | 233256435 | chr13 | 123847301 | 123847794 | 542 | 494  | 0 | 65 | 98.99 |
| chr17 | 23455023  | 23455557  | chr19 | 26783649  | 26784182  | 535 | 534  | 0 | 27 | 99.06 |
| chr17 | 60117316  | 60117849  | chr19 | 63498832  | 63499363  | 534 | 532  | 0 | 55 | 89.48 |
| chr10 | 87826478  | 87827009  | chr8  | 89434962  | 89435495  | 532 | 534  | 0 | 63 | 99.25 |
| chr21 | 22666856  | 22667378  | chr22 | 22814875  | 22815398  | 523 | 524  | 0 | 80 | 97.9  |
| chr10 | 59423942  | 59424464  | chr8  | 60249392  | 60249914  | 523 | 523  | 0 | 5  | 97.32 |
| chrX  | 11522793  | 11523315  | chrX  | 11846105  | 11846619  | 523 | 515  | 0 | 33 | 99.22 |
| chr10 | 43804716  | 43805237  | chr8  | 44525849  | 44526371  | 522 | 523  | 0 | 18 | 99.23 |
| chr3  | 10108076  | 10108592  | chr2  | 10499107  | 10499622  | 517 | 516  | 0 | 37 | 99.03 |
| chr19 | 53012031  | 53012546  | chr20 | 50340265  | 50340815  | 516 | 551  | 0 | 48 | 91.67 |
| chrX  | 139502798 | 139503309 | chrX  | 144316574 | 144317107 | 512 | 534  | 0 | 53 | 88.26 |
| chr19 | 15692471  | 15692978  | chr20 | 16489892  | 16491188  | 508 | 1297 | 0 | 53 | 84.88 |
| chrX  | 51913958  | 51914464  | chrX  | 53050529  | 53051019  | 507 | 491  | 0 | 0  | 92.39 |
| chr21 | 32196199  | 32196704  | chr22 | 32173550  | 32174055  | 506 | 506  | 0 | 87 | 97.23 |
| chr2  | 17431562  | 17432067  | chr12 | 18253302  | 18253792  | 506 | 491  | 0 | 45 | 83.2  |
| chr11 | 61768338  | 61768842  | chr9  | 62799167  | 62799675  | 505 | 509  | 0 | 0  | 84.82 |
| chrX  | 52506287  | 52506790  | chrX  | 53626786  | 53627292  | 504 | 507  | 0 | 59 | 87.17 |
| chr13 | 111949900 | 111950403 | chr14 | 95583094  | 95583598  | 504 | 505  | 0 | 0  | 98.21 |
| chr3  | 51446532  | 51447033  | chr2  | 53043905  | 53044298  | 502 | 394  | 0 | 68 | 88.82 |
| chr13 | 86076352  | 86076852  | chr14 | 68819997  | 68820497  | 501 | 501  | 0 | 64 | 99    |
| chr1  | 105228850 | 105229346 | chr1  | 104391790 | 104392264 | 497 | 475  | 0 | 17 | 85.61 |
| chr7  | 4467715   | 4468210   | chr6  | 4842161   | 4842640   | 496 | 480  | 0 | 71 | 90.89 |
| chr3  | 32329909  | 32330398  | chr2  | 33322984  | 33323473  | 490 | 490  | 0 | 86 | 98.98 |
| chrX  | 117129791 | 117130280 | chrX  | 121101131 | 121101620 | 490 | 490  | 0 | 85 | 98.57 |
| chr2  | 17950489  | 17950977  | chr12 | 18777440  | 18777923  | 489 | 484  | 0 | 38 | 99.17 |

|       |           |           |       |           |           |     |      |   |    |       |
|-------|-----------|-----------|-------|-----------|-----------|-----|------|---|----|-------|
| chr5  | 2471344   | 2471829   | chr4  | 2568436   | 2568921   | 486 | 486  | 0 | 0  | 95.27 |
| chr4  | 136313622 | 136314106 | chr3  | 153357216 | 153357699 | 485 | 484  | 0 | 0  | 97.52 |
| chr5  | 180034534 | 180035015 | chr4  | 185708736 | 185709408 | 482 | 673  | 0 | 0  | 84.9  |
| chr8  | 118990567 | 118991046 | chr7  | 121716096 | 121716577 | 480 | 482  | 0 | 0  | 98.54 |
| chr19 | 51455927  | 51456405  | chr20 | 48699721  | 48699820  | 479 | 100  | 0 | 0  | 85.37 |
| chrX  | 50620825  | 50621298  | chrX  | 51833049  | 51833703  | 474 | 655  | 0 | 41 | 92.49 |
| chr18 | 18086435  | 18086903  | chr17 | 13990096  | 13990564  | 469 | 469  | 0 | 27 | 98.29 |
| chr4  | 89526457  | 89526925  | chr3  | 105522608 | 105523073 | 469 | 466  | 0 | 64 | 91.61 |
| chr2  | 225865098 | 225865565 | chr13 | 116448276 | 116448743 | 468 | 468  | 0 | 72 | 98.93 |
| chr18 | 53050326  | 53050792  | chr17 | 49921160  | 49921626  | 467 | 467  | 0 | 0  | 94.22 |
| chrX  | 54683137  | 54683600  | chrX  | 56012167  | 56012636  | 464 | 470  | 0 | 0  | 91.3  |
| chr9  | 102770090 | 102770551 | chr11 | 87022035  | 87022496  | 462 | 462  | 0 | 13 | 97.84 |
| chr1  | 214386558 | 214387018 | chr1  | 198113937 | 198121952 | 461 | 8016 | 0 | 63 | 93.04 |
| chrX  | 10703036  | 10703496  | chrX  | 11017130  | 11017590  | 461 | 461  | 0 | 0  | 94.36 |
| chr8  | 95651898  | 95652357  | chr7  | 97891418  | 97891848  | 460 | 431  | 0 | 66 | 87.15 |
| chr9  | 114294256 | 114294714 | chr11 | 98836036  | 98836494  | 459 | 459  | 0 | 25 | 98.26 |
| chr10 | 28304028  | 28304486  | chr8  | 27877016  | 27877473  | 459 | 458  | 0 | 75 | 90.56 |
| chr6  | 155416581 | 155417036 | chr5  | 158979949 | 158980415 | 456 | 467  | 0 | 35 | 97.81 |
| chr7  | 72628485  | 72628940  | chr6  | 74428787  | 74429242  | 456 | 456  | 0 | 0  | 87.8  |
| chr5  | 169108397 | 169108852 | chr4  | 176360756 | 176361210 | 456 | 455  | 0 | 32 | 92.97 |
| chr7  | 128149123 | 128149575 | chr6  | 130564926 | 130565383 | 453 | 458  | 0 | 14 | 89.94 |
| chr5  | 175722812 | 175723261 | chr4  | 183175597 | 183176046 | 450 | 450  | 0 | 10 | 98.67 |
| chr13 | 87741132  | 87741576  | chr14 | 70517141  | 70517587  | 445 | 447  | 0 | 0  | 98.2  |
| chr17 | 32324600  | 32325041  | chr19 | 35500777  | 35501218  | 442 | 442  | 0 | 26 | 98.42 |
| chr7  | 8755426   | 8755865   | chr6  | 9179645   | 9180084   | 440 | 440  | 0 | 51 | 89.2  |
| chrX  | 135085218 | 135085656 | chrX  | 139735942 | 139736382 | 439 | 441  | 0 | 0  | 83.98 |
| chr1  | 4303571   | 4304001   | chr1  | 3949111   | 3949544   | 431 | 434  | 0 | 0  | 95.8  |
| chr19 | 61033519  | 61033948  | chr20 | 58472963  | 58473720  | 430 | 758  | 0 | 0  | 86.96 |
| chrX  | 93391342  | 93391771  | chrX  | 96312741  | 96313173  | 430 | 433  | 0 | 74 | 96.25 |
| chr1  | 195700589 | 195701015 | chr1  | 178378515 | 178378793 | 427 | 279  | 0 | 31 | 90.25 |
| chr11 | 5308631   | 5309055   | chr9  | 5408231   | 5408652   | 425 | 422  | 0 | 0  | 76.61 |
| chr22 | 33783556  | 33783975  | chr23 | 33931439  | 33931858  | 420 | 420  | 0 | 71 | 99.29 |
| chr9  | 87640955  | 87641374  | chr11 | 71609655  | 71610033  | 420 | 379  | 0 | 0  | 79.51 |
| chr1  | 243612883 | 243613301 | chr1  | 227746552 | 227746971 | 419 | 420  | 0 | 49 | 98.33 |
| chr5  | 110822860 | 110823277 | chr4  | 116931655 | 116932075 | 418 | 421  | 0 | 35 | 94.96 |
| chrX  | 50264659  | 50265074  | chrX  | 51369475  | 51369890  | 416 | 416  | 0 | 40 | 99.28 |
| chr17 | 69643821  | 69644236  | chr19 | 72974571  | 72974985  | 416 | 415  | 0 | 0  | 98.8  |
| chrX  | 152312263 | 152312677 | chrX  | 157704203 | 157704621 | 415 | 419  | 0 | 0  | 88.01 |
| chr4  | 65136859  | 65137272  | chr3  | 81504583  | 81504996  | 414 | 414  | 0 | 26 | 98.79 |
| chr14 | 48784628  | 48785040  | chr15 | 48171749  | 48172162  | 413 | 414  | 0 | 46 | 98.06 |
| chr2  | 206036015 | 206036425 | chr13 | 96105630  | 96106037  | 411 | 408  | 0 | 74 | 92.86 |
| chr4  | 73403961  | 73404368  | chr3  | 60331225  | 60331632  | 408 | 408  | 0 | 89 | 96.81 |
| chr5  | 141555451 | 141555858 | chr4  | 148199108 | 148199197 | 408 | 90   | 0 | 75 | 84.72 |
| chr19 | 14715164  | 14715570  | chr20 | 15335312  | 15335722  | 407 | 411  | 0 | 0  | 81.22 |
| chrX  | 24121089  | 24121490  | chrX  | 24990287  | 24990689  | 402 | 403  | 0 | 19 | 89.55 |
| chr19 | 44948129  | 44948530  | chr20 | 41875857  | 41876252  | 402 | 396  | 0 | 0  | 89.37 |
| chrX  | 35378813  | 35379213  | chrX  | 36730859  | 36731261  | 401 | 403  | 0 | 26 | 99    |
| chr19 | 578051    | 578451    | chr20 | 627756    | 628153    | 401 | 398  | 0 | 75 | 94.97 |
| chr1  | 91833917  | 91834316  | chr1  | 90780893  | 90781292  | 400 | 400  | 0 | 78 | 99.25 |
| chr3  | 33765539  | 33765937  | chr2  | 34777932  | 34778330  | 399 | 399  | 0 | 58 | 97.49 |
| chr11 | 61817080  | 61817477  | chr9  | 62752963  | 62753665  | 398 | 703  | 0 | 28 | 79.04 |
| chr14 | 23880644  | 23881040  | chr15 | 22784974  | 22785371  | 397 | 398  | 0 | 0  | 99.24 |
| chr9  | 5187454   | 5187849   | chr11 | 5156659   | 5157045   | 396 | 387  | 0 | 0  | 78.67 |

|       |           |           |       |           |           |     |      |   |    |       |
|-------|-----------|-----------|-------|-----------|-----------|-----|------|---|----|-------|
| chr14 | 62279662  | 62280056  | chr15 | 61847509  | 61847902  | 395 | 394  | 0 | 38 | 94.92 |
| chr4  | 110716391 | 110716781 | chr3  | 127214619 | 127215010 | 391 | 392  | 0 | 74 | 85.27 |
| chr16 | 12556861  | 12557248  | chr18 | 12952461  | 12952844  | 388 | 384  | 0 | 0  | 94.75 |
| chr21 | 44712843  | 44713230  | chr22 | 44886454  | 44886837  | 388 | 384  | 0 | 15 | 96.09 |
| chr2  | 71934236  | 71934623  | chr12 | 74332659  | 74333038  | 388 | 380  | 0 | 0  | 87.34 |
| chrX  | 3637642   | 3638028   | chrX  | 3421113   | 3421510   | 387 | 398  | 0 | 43 | 86.54 |
| chr9  | 23990900  | 23991285  | chr11 | 24434474  | 24434868  | 386 | 395  | 0 | 13 | 82.04 |
| chr2  | 216767738 | 216768122 | chr13 | 106945213 | 106945617 | 385 | 405  | 0 | 79 | 93.44 |
| chr4  | 166207360 | 166207743 | chr3  | 183658772 | 183659187 | 384 | 416  | 0 | 0  | 78.72 |
| chrX  | 108415444 | 108415826 | chrX  | 112109130 | 112109406 | 383 | 277  | 0 | 83 | 93.73 |
| chr2  | 184792030 | 184792411 | chr13 | 74599115  | 74599496  | 382 | 382  | 0 | 0  | 99.21 |
| chr9  | 28295841  | 28296221  | chr11 | 28782288  | 28782668  | 381 | 381  | 0 | 22 | 98.43 |
| chrX  | 15700103  | 15700483  | chrX  | 16168208  | 16168587  | 381 | 380  | 0 | 72 | 96.58 |
| chrX  | 83772163  | 83772541  | chrX  | 86395427  | 86395805  | 379 | 379  | 0 | 0  | 98.42 |
| chr14 | 91601653  | 91602031  | chr15 | 91978955  | 91979022  | 379 | 68   | 0 | 76 | 98.51 |
| chr13 | 113840040 | 113840416 | chr14 | 97490865  | 97491241  | 377 | 377  | 0 | 0  | 96.55 |
| chrX  | 67633776  | 67634150  | chrX  | 69723559  | 69723933  | 375 | 375  | 0 | 0  | 95.2  |
| chr12 | 68040855  | 68041227  | chr10 | 69582248  | 69582621  | 373 | 374  | 0 | 70 | 97.32 |
| chr14 | 75803110  | 75803481  | chr15 | 75852161  | 75852530  | 372 | 370  | 0 | 82 | 90.27 |
| chr6  | 72044609  | 72044978  | chr5  | 73168791  | 73169167  | 370 | 377  | 0 | 26 | 92.7  |
| chr18 | 54574647  | 54575016  | chr17 | 51467753  | 51468122  | 370 | 370  | 0 | 70 | 98.38 |
| chr7  | 103082342 | 103082708 | chr6  | 104921604 | 104921964 | 367 | 361  | 0 | 0  | 89.8  |
| chr14 | 88053915  | 88054280  | chr15 | 88305132  | 88305512  | 366 | 381  | 0 | 28 | 96.68 |
| chr8  | 115362180 | 115362543 | chr7  | 117926286 | 117926651 | 364 | 366  | 0 | 0  | 99.45 |
| chr1  | 29879461  | 29879822  | chr1  | 30479398  | 30479768  | 362 | 371  | 0 | 30 | 87.61 |
| chr22 | 43620922  | 43621282  | chr23 | 43931098  | 43931458  | 361 | 361  | 0 | 0  | 98.61 |
| chr19 | 9064848   | 9065207   | chr20 | 9448254   | 9448613   | 360 | 360  | 0 | 0  | 95.82 |
| chr10 | 32757660  | 32758018  | chr8  | 33139698  | 33140057  | 359 | 360  | 0 | 45 | 99.44 |
| chr8  | 138210629 | 138210986 | chr7  | 141203488 | 141203846 | 358 | 359  | 0 | 22 | 98.32 |
| chr19 | 46773741  | 46774098  | chr20 | 43706266  | 43706622  | 358 | 357  | 0 | 0  | 86.67 |
| chr2  | 111152313 | 111152668 | chr12 | 114164407 | 114164763 | 356 | 357  | 0 | 0  | 97.75 |
| chr18 | 66427200  | 66427555  | chr17 | 63406534  | 63406889  | 356 | 356  | 0 | 1  | 99.16 |
| chr4  | 112163159 | 112163514 | chr3  | 128723608 | 128723963 | 356 | 356  | 0 | 0  | 99.72 |
| chr21 | 30892802  | 30893156  | chr22 | 30852081  | 30852532  | 355 | 452  | 0 | 0  | 89.01 |
| chr8  | 118990212 | 118990566 | chr7  | 121704776 | 121705131 | 355 | 356  | 0 | 85 | 99.44 |
| chr1  | 76335600  | 76335953  | chr1  | 74893099  | 74893452  | 354 | 354  | 0 | 34 | 99.15 |
| chr16 | 65865089  | 65865442  | chr18 | 60125845  | 60126189  | 354 | 345  | 0 | 79 | 98.55 |
| chr19 | 46818123  | 46818475  | chr20 | 43882940  | 43883294  | 353 | 355  | 0 | 0  | 87.18 |
| chr7  | 66575949  | 66576295  | chr6  | 68380697  | 68381046  | 347 | 350  | 0 | 8  | 98.85 |
| chr7  | 62995497  | 62995843  | chr6  | 66542426  | 66542770  | 347 | 345  | 0 | 78 | 88.5  |
| chr3  | 35030469  | 35030814  | chr2  | 36047376  | 36047729  | 346 | 354  | 0 | 7  | 95.28 |
| chr7  | 103081995 | 103082339 | chr6  | 104920778 | 104921121 | 345 | 344  | 0 | 0  | 95.04 |
| chr9  | 11810114  | 11810456  | chr11 | 11920466  | 11920805  | 343 | 340  | 0 | 47 | 96.76 |
| chr4  | 167859368 | 167859710 | chr3  | 185305521 | 185305838 | 343 | 318  | 0 | 65 | 95.91 |
| chr1  | 115553438 | 115553779 | chr1  | 115357991 | 115358330 | 342 | 340  | 0 | 0  | 87.02 |
| chr19 | 46790422  | 46790762  | chr20 | 43767792  | 43768106  | 341 | 315  | 0 | 1  | 82.41 |
| chr3  | 82286240  | 82286579  | chr2  | 84522462  | 84524553  | 340 | 2092 | 0 | 0  | 99.1  |
| chr11 | 79625785  | 79626124  | chr9  | 80980892  | 80981232  | 340 | 341  | 0 | 42 | 93.24 |
| chr8  | 80823503  | 80823840  | chr7  | 82952573  | 82952910  | 338 | 338  | 0 | 0  | 98.82 |
| chr10 | 133303072 | 133303405 | chr8  | 136046158 | 136046491 | 334 | 334  | 0 | 0  | 97.31 |
| chr8  | 83725883  | 83726215  | chr7  | 85802678  | 85803012  | 333 | 335  | 0 | 63 | 98.5  |
| chr2  | 194553713 | 194554042 | chr13 | 84466177  | 84466507  | 330 | 331  | 0 | 0  | 95.15 |
| chr1  | 154855515 | 154855844 | chr1  | 136906580 | 136906908 | 330 | 329  | 0 | 0  | 99.39 |

|       |           |           |       |           |           |     |       |   |    |       |
|-------|-----------|-----------|-------|-----------|-----------|-----|-------|---|----|-------|
| chr2  | 132016651 | 132016977 | chr13 | 17917805  | 17918131  | 327 | 327   | 0 | 43 | 98.78 |
| chr6  | 41284315  | 41284640  | chr5  | 41889465  | 41889802  | 326 | 338   | 0 | 0  | 93.25 |
| chrX  | 140491772 | 140492097 | chrX  | 144460220 | 144460544 | 326 | 325   | 0 | 88 | 97.53 |
| chr13 | 82171545  | 82171869  | chr14 | 64879482  | 64879789  | 325 | 308   | 0 | 73 | 98.01 |
| chr4  | 34623470  | 34623793  | chr3  | 34936749  | 34937070  | 324 | 322   | 0 | 0  | 93.17 |
| chr9  | 121640652 | 121640975 | chr11 | 106377985 | 106378301 | 324 | 317   | 0 | 0  | 96.84 |
| chr8  | 112883782 | 112884103 | chr7  | 115388735 | 115389056 | 322 | 322   | 0 | 12 | 95.96 |
| chr9  | 14058203  | 14058523  | chr11 | 14260446  | 14261402  | 321 | 957   | 0 | 0  | 90.29 |
| chr2  | 156445101 | 156445419 | chr13 | 45633794  | 45634112  | 319 | 319   | 0 | 22 | 98.12 |
| chrY  | 14306584  | 14306902  | chrY  | 14967063  | 14967381  | 319 | 319   | 0 | 36 | 95.92 |
| chr6  | 37638857  | 37639174  | chr5  | 38126516  | 38126834  | 318 | 319   | 0 | 0  | 97.79 |
| chrX  | 104626990 | 104627306 | chrX  | 108087701 | 108088057 | 317 | 357   | 0 | 0  | 83.92 |
| chr11 | 113877739 | 113878055 | chr9  | 115882091 | 115882407 | 317 | 317   | 0 | 45 | 97.79 |
| chr1  | 20594574  | 20594889  | chr1  | 20910092  | 20910397  | 316 | 306   | 0 | 78 | 97.06 |
| chr6  | 94773751  | 94774064  | chr5  | 96520973  | 96521290  | 314 | 318   | 0 | 0  | 99.36 |
| chr2  | 182572794 | 182573107 | chr13 | 72321111  | 72321419  | 314 | 309   | 0 | 0  | 89.26 |
| chr7  | 35266178  | 35266490  | chr6  | 36438161  | 36438477  | 313 | 317   | 0 | 39 | 100   |
| chr3  | 185363194 | 185363506 | chr2  | 189312808 | 189313120 | 313 | 313   | 0 | 21 | 99.36 |
| chr14 | 41577768  | 41578078  | chr15 | 40746333  | 40746643  | 311 | 311   | 0 | 0  | 98.71 |
| chr19 | 59893961  | 59894271  | chr20 | 57351935  | 57352242  | 311 | 308   | 0 | 63 | 91.61 |
| chr8  | 9150532   | 9150840   | chr7  | 9781989   | 9782300   | 309 | 312   | 0 | 0  | 99.35 |
| chr8  | 85990736  | 85991044  | chr7  | 88128531  | 88128839  | 309 | 309   | 0 | 0  | 99.03 |
| chr21 | 44818242  | 44818550  | chr22 | 44999678  | 44999959  | 309 | 282   | 0 | 0  | 91.76 |
| chr19 | 57792525  | 57792832  | chr20 | 55288177  | 55299083  | 308 | 10907 | 0 | 20 | 86.34 |
| chr13 | 29464463  | 29464770  | chr14 | 28664262  | 28664488  | 308 | 227   | 0 | 60 | 94.69 |
| chr12 | 73652434  | 73652740  | chr10 | 75376587  | 75376893  | 307 | 307   | 0 | 41 | 98.7  |
| chr4  | 70001224  | 70001530  | chr3  | 76885193  | 76885499  | 307 | 307   | 0 | 83 | 98.37 |
| chr5  | 2280237   | 2280542   | chr4  | 2383967   | 2384272   | 306 | 306   | 0 | 61 | 99.02 |
| chrX  | 25227544  | 25227849  | chrX  | 26049182  | 26049487  | 306 | 306   | 0 | 0  | 99.35 |
| chrX  | 129339967 | 129340271 | chrX  | 133590000 | 133590286 | 305 | 287   | 0 | 0  | 88.97 |
| chr4  | 29804041  | 29804344  | chr3  | 30391196  | 30391504  | 304 | 309   | 0 | 0  | 98.03 |
| chr12 | 128909455 | 128909758 | chr10 | 132047397 | 132047700 | 304 | 304   | 0 | 0  | 86    |
| chr4  | 37219989  | 37220291  | chr3  | 39885730  | 39886032  | 303 | 303   | 0 | 16 | 97.69 |
| chr1  | 70579037  | 70579338  | chr1  | 69238635  | 69238932  | 302 | 298   | 0 | 0  | 83.92 |
| chr6  | 141661682 | 141661982 | chr5  | 144559700 | 144559999 | 301 | 300   | 0 | 0  | 98.67 |
| chr6  | 135072671 | 135072970 | chr5  | 137848279 | 137849483 | 300 | 1205  | 0 | 33 | 99.31 |
| chr2  | 18868293  | 18868592  | chr12 | 19702641  | 19702940  | 300 | 300   | 0 | 53 | 100   |
| chr8  | 134259439 | 134259737 | chr7  | 137240092 | 137240390 | 299 | 299   | 0 | 0  | 98.33 |
| chr6  | 145169404 | 145169702 | chr5  | 148090480 | 148090773 | 299 | 294   | 0 | 0  | 99.32 |
| chr10 | 124690604 | 124690900 | chr8  | 126947929 | 126948204 | 297 | 276   | 0 | 0  | 82.66 |
| chr12 | 103050593 | 103050888 | chr10 | 105527281 | 105527578 | 296 | 298   | 0 | 17 | 92.91 |
| chr18 | 35157793  | 35158087  | chr17 | 31347646  | 31347881  | 295 | 236   | 0 | 58 | 96.96 |
| chr20 | 61680512  | 61680805  | chr21 | 64727448  | 64727741  | 294 | 294   | 0 | 0  | 92.52 |
| chr1  | 73693631  | 73693921  | chr1  | 72262542  | 72262833  | 291 | 292   | 0 | 0  | 97.25 |
| chr4  | 121719951 | 121720240 | chr3  | 138338342 | 138338631 | 290 | 290   | 0 | 0  | 98.97 |
| chr2  | 186317954 | 186318243 | chr13 | 76131413  | 76131701  | 290 | 289   | 0 | 0  | 89.2  |
| chr9  | 113317360 | 113317648 | chr11 | 97854577  | 97854853  | 289 | 277   | 0 | 62 | 93.77 |
| chr17 | 64461759  | 64462047  | chr19 | 67763523  | 67763614  | 289 | 92    | 0 | 63 | 91.01 |
| chr9  | 21425344  | 21425631  | chr11 | 21648765  | 21649051  | 288 | 287   | 0 | 68 | 93.03 |
| chrX  | 141516183 | 141516468 | chrX  | 146585710 | 146585937 | 286 | 228   | 0 | 32 | 79.11 |
| chr4  | 35149794  | 35150077  | chr3  | 37802922  | 37803204  | 284 | 283   | 0 | 0  | 97.17 |
| chrX  | 51826820  | 51827102  | chrX  | 52934670  | 52934952  | 283 | 283   | 0 | 0  | 81.2  |
| chrX  | 3244862   | 3245144   | chrX  | 3010641   | 3010921   | 283 | 281   | 0 | 0  | 86.57 |

|       |           |           |       |           |           |     |     |   |    |       |
|-------|-----------|-----------|-------|-----------|-----------|-----|-----|---|----|-------|
| chr12 | 4562669   | 4562949   | chr10 | 4827563   | 4827842   | 281 | 280 | 0 | 0  | 93.93 |
| chr14 | 69444425  | 69444703  | chr15 | 69119854  | 69120132  | 279 | 279 | 0 | 44 | 98.92 |
| chr3  | 137104791 | 137105066 | chr2  | 139369425 | 139369700 | 276 | 276 | 0 | 0  | 96.38 |
| chr5  | 125750968 | 125751243 | chr4  | 30007891  | 30008166  | 276 | 276 | 0 | 14 | 98.91 |
| chrX  | 42564213  | 42564487  | chrX  | 43956731  | 43957058  | 275 | 328 | 0 | 1  | 97.74 |
| chr14 | 83504719  | 83504993  | chr15 | 83635449  | 83635719  | 275 | 271 | 0 | 26 | 98.15 |
| chr4  | 42664715  | 42664988  | chr3  | 45358275  | 45358544  | 274 | 270 | 0 | 52 | 91.79 |
| chrX  | 101922666 | 101922938 | chrX  | 105402879 | 105403150 | 273 | 272 | 0 | 67 | 94.4  |
| chr2  | 214349388 | 214349659 | chr13 | 104481406 | 104481677 | 272 | 272 | 0 | 0  | 98.16 |
| chr6  | 149280432 | 149280703 | chr5  | 152729677 | 152729948 | 272 | 272 | 0 | 4  | 95.59 |
| chr7  | 143895670 | 143895940 | chr6  | 146519934 | 146520203 | 271 | 270 | 0 | 0  | 98.89 |
| chr10 | 122747720 | 122747990 | chr8  | 125097294 | 125097555 | 271 | 262 | 0 | 0  | 86.43 |
| chr12 | 53964237  | 53964506  | chr10 | 55234572  | 55234842  | 270 | 271 | 0 | 0  | 81.11 |
| chr8  | 90893025  | 90893294  | chr7  | 93113774  | 93114043  | 270 | 270 | 0 | 85 | 99.26 |
| chrY  | 8273131   | 8273400   | chrY  | 7846316   | 7846527   | 270 | 212 | 0 | 38 | 89.47 |
| chr19 | 47849556  | 47849823  | chr20 | 44687429  | 44687697  | 268 | 269 | 0 | 4  | 86.15 |
| chr8  | 143802241 | 143802507 | chr7  | 147213786 | 147214317 | 267 | 532 | 0 | 0  | 97.74 |
| chr14 | 54399273  | 54399539  | chr15 | 53851740  | 53852007  | 267 | 268 | 0 | 83 | 94.01 |
| chr15 | 31987740  | 31988006  | chr16 | 31626198  | 31626464  | 267 | 267 | 0 | 0  | 98.88 |
| chr7  | 95119714  | 95119980  | chr6  | 96726824  | 96727090  | 267 | 267 | 0 | 0  | 99.63 |
| chr6  | 27890665  | 27890930  | chr5  | 28374211  | 28374476  | 266 | 266 | 0 | 0  | 87.45 |
| chr11 | 117624560 | 117624825 | chr9  | 119640221 | 119640476 | 266 | 256 | 0 | 0  | 95.67 |
| chr19 | 20493206  | 20493470  | chr20 | 21409382  | 21409645  | 265 | 264 | 0 | 39 | 83.2  |
| chr8  | 54573512  | 54573776  | chr7  | 56244720  | 56244983  | 265 | 264 | 0 | 40 | 97.35 |
| chr11 | 97224350  | 97224613  | chr9  | 99169731  | 99169994  | 264 | 264 | 0 | 0  | 99.24 |
| chr8  | 114986483 | 114986745 | chr7  | 117542152 | 117542418 | 263 | 267 | 0 | 40 | 96.58 |
| chr3  | 22621122  | 22621384  | chr2  | 23515948  | 23516210  | 263 | 263 | 0 | 30 | 100   |
| chr11 | 59787862  | 59788124  | chr9  | 60779786  | 60780047  | 263 | 262 | 0 | 0  | 86.26 |
| chr21 | 41815203  | 41815464  | chr22 | 41850815  | 41851367  | 262 | 553 | 0 | 0  | 87.35 |
| chr19 | 60566746  | 60567006  | chr20 | 57992703  | 57993052  | 261 | 350 | 0 | 71 | 90.42 |
| chr5  | 115158444 | 115158704 | chr4  | 121328308 | 121328568 | 261 | 261 | 0 | 1  | 98.85 |
| chr7  | 5808986   | 5809246   | chr6  | 6993874   | 6994134   | 261 | 261 | 0 | 39 | 97.7  |
| chr1  | 153083184 | 153083443 | chr1  | 135044589 | 135044857 | 260 | 269 | 0 | 33 | 98.05 |
| chr3  | 63196095  | 63196354  | chr2  | 64961439  | 64961703  | 260 | 265 | 0 | 50 | 91.12 |
| chr1  | 77545666  | 77545925  | chr1  | 76114864  | 76115123  | 260 | 260 | 0 | 1  | 98.85 |
| chr3  | 29483368  | 29483627  | chr2  | 30418983  | 30419242  | 260 | 260 | 0 | 0  | 96.15 |
| chrX  | 67691907  | 67692166  | chrX  | 69664636  | 69664895  | 260 | 260 | 0 | 0  | 97.69 |
| chr4  | 166260564 | 166260822 | chr3  | 183650173 | 183650432 | 259 | 260 | 0 | 33 | 89.58 |
| chr9  | 22325048  | 22325306  | chr11 | 22594206  | 22594464  | 259 | 259 | 0 | 0  | 98.46 |
| chr11 | 93314319  | 93314577  | chr9  | 95198085  | 95198341  | 259 | 257 | 0 | 27 | 93.77 |
| chr2  | 224663742 | 224664000 | chr13 | 115244566 | 115244808 | 259 | 243 | 0 | 45 | 91.77 |
| chr13 | 89063543  | 89063800  | chr14 | 72000874  | 72001149  | 258 | 276 | 0 | 7  | 90.08 |
| chr3  | 112062109 | 112062366 | chr2  | 113617151 | 113617409 | 258 | 259 | 0 | 30 | 86.43 |
| chr4  | 187377194 | 187377450 | chr3  | 205596591 | 205596847 | 257 | 257 | 0 | 0  | 98.44 |
| chr4  | 8574174   | 8574428   | chr3  | 8649657   | 8649918   | 255 | 262 | 0 | 0  | 89.41 |
| chrX  | 118919827 | 118920079 | chrX  | 122940715 | 122941288 | 253 | 574 | 0 | 0  | 85.38 |
| chr11 | 2155615   | 2155867   | chr9  | 2352405   | 2352657   | 253 | 253 | 0 | 0  | 98.42 |
| chr15 | 57825126  | 57825378  | chr16 | 58192308  | 58192541  | 253 | 234 | 0 | 74 | 89.32 |
| chr16 | 31520760  | 31521011  | chr18 | 32562142  | 32562394  | 252 | 253 | 0 | 0  | 95.24 |
| chr2  | 205463633 | 205463884 | chr13 | 95475976  | 95476227  | 252 | 252 | 0 | 0  | 98.41 |
| chr7  | 117863089 | 117863339 | chr6  | 120180553 | 120180803 | 251 | 251 | 0 | 26 | 98.39 |
| chr3  | 133246592 | 133246842 | chr2  | 135343016 | 135343260 | 251 | 245 | 0 | 0  | 90.98 |
| chr8  | 9197457   | 9197706   | chr7  | 9828847   | 9829105   | 250 | 259 | 0 | 0  | 85.54 |

|       |           |           |       |           |           |     |     |   |    |       |
|-------|-----------|-----------|-------|-----------|-----------|-----|-----|---|----|-------|
| chr10 | 126829346 | 126829595 | chr8  | 129341975 | 129342224 | 250 | 250 | 0 | 0  | 98    |
| chr17 | 64295420  | 64295669  | chr19 | 67596346  | 67596595  | 250 | 250 | 0 | 0  | 89.02 |
| chr4  | 33169967  | 33170216  | chr3  | 33563861  | 33564110  | 250 | 250 | 0 | 14 | 99.2  |
| chrY  | 8686669   | 8686918   | chrY  | 8341734   | 8341978   | 250 | 245 | 0 | 0  | 84.9  |
| chr2  | 213672625 | 213672873 | chr13 | 103795427 | 103795741 | 249 | 315 | 0 | 29 | 90.61 |
| chr10 | 96228342  | 96228590  | chr8  | 97986686  | 97986934  | 249 | 249 | 0 | 2  | 99.2  |
| chr9  | 74127695  | 74127943  | chr11 | 57958754  | 57959002  | 249 | 249 | 0 | 65 | 97.59 |
| chr6  | 161156373 | 161156621 | chr5  | 164795771 | 164796016 | 249 | 246 | 0 | 68 | 89.14 |
| chrX  | 113003180 | 113003428 | chrX  | 116853434 | 116853679 | 249 | 246 | 0 | 0  | 95.12 |
| chr8  | 97853067  | 97853315  | chr7  | 100106367 | 100106611 | 249 | 245 | 0 | 12 | 96.73 |
| chr19 | 2621725   | 2621972   | chr20 | 2769702   | 2769916   | 248 | 215 | 0 | 46 | 89.11 |
| chr4  | 110986047 | 110986294 | chr3  | 127482877 | 127483065 | 248 | 189 | 0 | 59 | 92.02 |
| chr1  | 43610420  | 43610666  | chr1  | 44587368  | 44587624  | 247 | 257 | 0 | 58 | 95.95 |
| chr9  | 101684793 | 101685039 | chr11 | 85942590  | 85942836  | 247 | 247 | 0 | 0  | 98.79 |
| chr22 | 34532842  | 34533087  | chr23 | 34657429  | 34657673  | 246 | 245 | 0 | 0  | 98.78 |
| chr5  | 144542498 | 144542741 | chr4  | 151219871 | 151220117 | 244 | 247 | 0 | 30 | 87.97 |
| chr14 | 22242973  | 22243216  | chr15 | 21168974  | 21169217  | 244 | 244 | 0 | 0  | 98.36 |
| chr14 | 67673916  | 67674158  | chr15 | 67298025  | 67298267  | 243 | 243 | 0 | 60 | 100   |
| chr7  | 143897623 | 143897865 | chr6  | 146518101 | 146518343 | 243 | 243 | 0 | 66 | 98.35 |
| chr14 | 40132921  | 40133163  | chr15 | 39450970  | 39451211  | 243 | 242 | 0 | 68 | 88.75 |
| chr9  | 127536467 | 127536707 | chr11 | 112352524 | 112352881 | 241 | 358 | 0 | 0  | 98.76 |
| chr20 | 23523955  | 23524195  | chr21 | 23796151  | 23796394  | 241 | 244 | 0 | 0  | 78.07 |
| chr12 | 50984367  | 50984606  | chr10 | 52192037  | 52192276  | 240 | 240 | 0 | 0  | 98.75 |
| chr18 | 64706235  | 64706474  | chr17 | 61678306  | 61678545  | 240 | 240 | 0 | 0  | 99.58 |
| chr2  | 74153649  | 74153888  | chr12 | 76553524  | 76553763  | 240 | 240 | 0 | 0  | 87.29 |
| chr16 | 878693    | 878931    | chr18 | 929272    | 929508    | 239 | 237 | 0 | 0  | 98.31 |
| chr8  | 143585227 | 143585465 | chr7  | 146725576 | 146725812 | 239 | 237 | 0 | 38 | 92.8  |
| chr11 | 58901993  | 58902230  | chr9  | 59784130  | 59784400  | 238 | 271 | 0 | 0  | 82.61 |
| chr11 | 25382729  | 25382966  | chr9  | 25702119  | 25702356  | 238 | 238 | 0 | 0  | 97.9  |
| chr13 | 111870495 | 111870732 | chr14 | 95495031  | 95495268  | 238 | 238 | 0 | 0  | 86.13 |
| chr7  | 54023420  | 54023657  | chr6  | 55718444  | 55718681  | 238 | 238 | 0 | 0  | 99.16 |
| chrX  | 12105042  | 12105279  | chrX  | 12469887  | 12470124  | 238 | 238 | 0 | 0  | 96.64 |
| chr18 | 41572732  | 41572968  | chr17 | 37903659  | 37903903  | 237 | 245 | 0 | 0  | 92.83 |
| chr8  | 90477218  | 90477454  | chr7  | 92689570  | 92689804  | 237 | 235 | 0 | 56 | 91.91 |
| chr3  | 95579567  | 95579801  | chr2  | 96650284  | 96650546  | 235 | 263 | 0 | 32 | 100   |
| chr4  | 174809222 | 174809456 | chr3  | 192791874 | 192792109 | 235 | 236 | 0 | 0  | 97.45 |
| chr7  | 128091513 | 128091747 | chr6  | 130539567 | 130539801 | 235 | 235 | 0 | 0  | 99.15 |
| chr18 | 61351670  | 61351904  | chr17 | 58215144  | 58215376  | 235 | 233 | 0 | 0  | 98.28 |
| chr6  | 112351077 | 112351309 | chr5  | 114694666 | 114694899 | 233 | 234 | 0 | 31 | 96.57 |
| chrX  | 96356407  | 96356639  | chrX  | 99424610  | 99424841  | 233 | 232 | 0 | 0  | 91.81 |
| chr6  | 49671643  | 49671875  | chr5  | 50473624  | 50473839  | 233 | 216 | 0 | 59 | 93.3  |
| chr1  | 2797390   | 2797621   | chr1  | 2634006   | 2634236   | 232 | 231 | 0 | 0  | 90    |
| chr8  | 47728216  | 47728446  | chr7  | 49220929  | 49221159  | 231 | 231 | 0 | 0  | 93.51 |
| chr1  | 194489414 | 194489643 | chr1  | 177143436 | 177143665 | 230 | 230 | 0 | 37 | 98.26 |
| chr16 | 71915623  | 71915852  | chr18 | 66289200  | 66289427  | 230 | 228 | 0 | 41 | 86.78 |
| chr5  | 14861213  | 14861440  | chr4  | 15344926  | 15345155  | 228 | 230 | 0 | 65 | 93.33 |
| chr19 | 62183978  | 62184205  | chr20 | 59920181  | 59920408  | 228 | 228 | 0 | 47 | 96.05 |
| chr19 | 54596302  | 54596529  | chr20 | 51954269  | 51954491  | 228 | 223 | 0 | 0  | 85.2  |
| chrX  | 148291295 | 148291521 | chrX  | 153512276 | 153512502 | 227 | 227 | 0 | 0  | 96.92 |
| chr15 | 57717254  | 57717480  | chr16 | 58135314  | 58135529  | 227 | 216 | 0 | 0  | 99.07 |
| chr10 | 86972248  | 86972473  | chr8  | 88572371  | 88572596  | 226 | 226 | 0 | 33 | 96.9  |
| chr9  | 90007144  | 90007369  | chr11 | 74185599  | 74185805  | 226 | 207 | 0 | 16 | 92.65 |
| chr11 | 38414757  | 38414981  | chr9  | 38896145  | 38896371  | 225 | 227 | 0 | 0  | 92.02 |

|       |           |           |       |           |           |     |      |   |    |       |
|-------|-----------|-----------|-------|-----------|-----------|-----|------|---|----|-------|
| chr20 | 58799268  | 58799492  | chr21 | 61799378  | 61799601  | 225 | 224  | 0 | 0  | 87.95 |
| chr7  | 113714295 | 113714518 | chr6  | 115768102 | 115768330 | 224 | 229  | 0 | 0  | 90.18 |
| chr22 | 30840535  | 30840757  | chr23 | 31012220  | 31012464  | 223 | 245  | 0 | 7  | 84.75 |
| chr8  | 78185211  | 78185433  | chr7  | 80259557  | 80259779  | 223 | 223  | 0 | 0  | 88.24 |
| chrX  | 150360024 | 150360245 | chrX  | 155626187 | 155626413 | 222 | 227  | 0 | 0  | 88.74 |
| chr9  | 117726471 | 117726692 | chr11 | 102325955 | 102326175 | 222 | 221  | 0 | 18 | 98.18 |
| chrX  | 11172442  | 11172663  | chrX  | 11515085  | 11515303  | 222 | 219  | 0 | 8  | 81.02 |
| chr8  | 22861330  | 22861551  | chr7  | 23802450  | 23802641  | 222 | 192  | 0 | 0  | 87.79 |
| chr4  | 23330127  | 23330347  | chr3  | 23851161  | 23851376  | 221 | 216  | 0 | 0  | 92.09 |
| chr19 | 11695048  | 11695267  | chr20 | 12161214  | 12162355  | 220 | 1142 | 0 | 0  | 84.65 |
| chr2  | 50785096  | 50785315  | chr12 | 52882731  | 52882950  | 220 | 220  | 0 | 0  | 94.55 |
| chr15 | 66500393  | 66500611  | chr16 | 67017777  | 67017995  | 219 | 219  | 0 | 38 | 99.09 |
| chr18 | 50577405  | 50577623  | chr17 | 47205810  | 47206028  | 219 | 219  | 0 | 0  | 100   |
| chr6  | 114775806 | 114776024 | chr5  | 117107397 | 117107613 | 219 | 217  | 0 | 0  | 94.01 |
| chrX  | 27111187  | 27111405  | chrX  | 27976209  | 27976425  | 219 | 217  | 0 | 26 | 87.02 |
| chrX  | 71740012  | 71740229  | chrX  | 74262961  | 74263176  | 218 | 216  | 0 | 59 | 90.28 |
| chr1  | 102895295 | 102895512 | chr1  | 102091664 | 102091877 | 218 | 214  | 0 | 12 | 94.39 |
| chr5  | 171817898 | 171818115 | chr4  | 179139711 | 179139890 | 218 | 180  | 0 | 0  | 96.24 |
| chr2  | 68658078  | 68658294  | chr12 | 70887032  | 70887251  | 217 | 220  | 0 | 0  | 93.55 |
| chr16 | 55259676  | 55259892  | chr18 | 49353514  | 49353729  | 217 | 216  | 0 | 0  | 81.38 |
| chr2  | 53025566  | 53025781  | chr12 | 55128563  | 55128778  | 216 | 216  | 0 | 0  | 93.98 |
| chr4  | 125778829 | 125779044 | chr3  | 142624574 | 142624789 | 216 | 216  | 0 | 0  | 96.3  |
| chr9  | 76209279  | 76209494  | chr11 | 60090241  | 60090456  | 216 | 216  | 0 | 13 | 97.69 |
| chr19 | 49484447  | 49484662  | chr20 | 46494324  | 46494535  | 216 | 212  | 0 | 0  | 81.44 |
| chr20 | 23514528  | 23514743  | chr21 | 23773543  | 23773750  | 216 | 208  | 0 | 0  | 88.2  |
| chr1  | 1043879   | 1044093   | chr1  | 923728    | 923942    | 215 | 215  | 0 | 25 | 96.74 |
| chrX  | 32869772  | 32869983  | chrX  | 34069909  | 34070224  | 212 | 316  | 0 | 0  | 87.32 |
| chr18 | 22425712  | 22425923  | chr17 | 18355958  | 18356172  | 212 | 215  | 0 | 0  | 87.56 |
| chr5  | 137046574 | 137046785 | chr4  | 143647695 | 143647907 | 212 | 213  | 0 | 34 | 97.64 |
| chr16 | 73527534  | 73527745  | chr18 | 67917911  | 67918122  | 212 | 212  | 0 | 34 | 97.17 |
| chr8  | 80183114  | 80183325  | chr7  | 82306650  | 82306861  | 212 | 212  | 0 | 5  | 87.2  |
| chr2  | 82523243  | 82523454  | chr12 | 85356478  | 85356686  | 212 | 209  | 0 | 71 | 96.65 |
| chr17 | 40573340  | 40573551  | chr19 | 43853135  | 43853341  | 212 | 207  | 0 | 72 | 98.96 |
| chr9  | 136831378 | 136831588 | chr11 | 121608260 | 121608471 | 211 | 212  | 0 | 0  | 97.63 |
| chr2  | 123047789 | 123047999 | chr13 | 9069623   | 9069832   | 211 | 210  | 0 | 0  | 91.9  |
| chr20 | 57961577  | 57961787  | chr21 | 60965510  | 60965719  | 211 | 210  | 0 | 0  | 88.1  |
| chr3  | 38137133  | 38137342  | chr2  | 39448175  | 39448384  | 210 | 210  | 0 | 0  | 92.23 |
| chrX  | 18882875  | 18883084  | chrX  | 19611907  | 19612113  | 210 | 207  | 0 | 42 | 92.54 |
| chr1  | 119519075 | 119519283 | chr1  | 119364875 | 119365084 | 209 | 210  | 0 | 0  | 98.56 |
| chr14 | 23012717  | 23012925  | chr15 | 21979726  | 21979933  | 209 | 208  | 0 | 11 | 99.04 |
| chr2  | 170783899 | 170784106 | chr13 | 60402112  | 60402318  | 208 | 207  | 0 | 0  | 98.07 |
| chr6  | 2674455   | 2674661   | chr5  | 2687360   | 2687904   | 207 | 545  | 0 | 0  | 97.58 |
| chr4  | 107032477 | 107032683 | chr3  | 123477837 | 123478047 | 207 | 211  | 0 | 8  | 98.07 |
| chr13 | 106474066 | 106474272 | chr14 | 89878584  | 89878790  | 207 | 207  | 0 | 0  | 100   |
| chr18 | 20519208  | 20519414  | chr17 | 16440557  | 16440759  | 207 | 203  | 0 | 0  | 97.54 |
| chr4  | 109329014 | 109329219 | chr3  | 125819902 | 125820107 | 206 | 206  | 0 | 0  | 98.54 |
| chr1  | 159429147 | 159429352 | chr1  | 141632659 | 141632863 | 206 | 205  | 0 | 0  | 98.54 |
| chr6  | 27350008  | 27350213  | chr5  | 27828622  | 27828824  | 206 | 203  | 0 | 0  | 90.15 |
| chr6  | 135297560 | 135297764 | chr5  | 138073891 | 138074095 | 205 | 205  | 0 | 40 | 95.12 |
| chr9  | 104499052 | 104499256 | chr11 | 88693804  | 88694008  | 205 | 205  | 0 | 0  | 78.89 |
| chr9  | 24511515  | 24511719  | chr11 | 24955503  | 24955697  | 205 | 195  | 0 | 0  | 88.08 |
| chr1  | 204002158 | 204002361 | chr1  | 187580798 | 187581005 | 204 | 208  | 0 | 40 | 94.61 |
| chr4  | 152558542 | 152558745 | chr3  | 169869214 | 169869417 | 204 | 204  | 0 | 0  | 88.24 |

|       |           |           |       |           |           |     |     |   |    |       |
|-------|-----------|-----------|-------|-----------|-----------|-----|-----|---|----|-------|
| chr2  | 239987855 | 239988057 | chr13 | 130980189 | 130980391 | 203 | 203 | 0 | 0  | 97.54 |
| chr13 | 27406494  | 27406696  | chr14 | 26588681  | 26588853  | 203 | 173 | 0 | 78 | 88.82 |
| chr9  | 5880422   | 5880623   | chr11 | 5807448   | 5807649   | 202 | 202 | 0 | 31 | 99.5  |
| chr11 | 117139136 | 117139336 | chr9  | 119144444 | 119144644 | 201 | 201 | 0 | 70 | 98.01 |
| chrX  | 111072172 | 111072372 | chrX  | 114810582 | 114810780 | 201 | 199 | 0 | 35 | 97.99 |
| chr9  | 127442310 | 127442509 | chr11 | 112257325 | 112257550 | 200 | 226 | 0 | 64 | 95.79 |
| chrX  | 113396608 | 113396807 | chrX  | 117253346 | 117253545 | 200 | 200 | 0 | 0  | 88    |
| chr16 | 31267199  | 31267397  | chr18 | 32066103  | 32066305  | 199 | 203 | 0 | 66 | 93.47 |
| chr12 | 90305218  | 90305416  | chr10 | 92472745  | 92472943  | 199 | 199 | 0 | 0  | 98.99 |
| chr9  | 81130243  | 81130440  | chr11 | 65126962  | 65127163  | 198 | 202 | 0 | 58 | 92.93 |
| chr12 | 559397    | 559594    | chr10 | 622099    | 622296    | 198 | 198 | 0 | 0  | 98.99 |
| chr20 | 58566618  | 58566814  | chr21 | 61568851  | 61569041  | 197 | 191 | 0 | 0  | 89.53 |
| chrX  | 37317621  | 37317816  | chrX  | 38800407  | 38800602  | 196 | 196 | 0 | 0  | 86.22 |
| chrX  | 53772452  | 53772647  | chrX  | 55069525  | 55069718  | 196 | 194 | 0 | 89 | 85.33 |
| chr11 | 13581614  | 13581808  | chr9  | 13794430  | 13794630  | 195 | 201 | 0 | 0  | 84.44 |
| chr10 | 31703660  | 31703854  | chr8  | 32099594  | 32099789  | 195 | 196 | 0 | 0  | 99.49 |
| chr14 | 91087767  | 91087961  | chr15 | 91462073  | 91462268  | 195 | 196 | 0 | 0  | 99.48 |
| chr22 | 29189066  | 29189260  | chr23 | 29223302  | 29223490  | 195 | 189 | 0 | 0  | 84.04 |
| chr22 | 45468976  | 45469169  | chr23 | 45794016  | 45794210  | 194 | 195 | 0 | 21 | 86.44 |
| chr16 | 70209174  | 70209366  | chr18 | 64568494  | 64568689  | 193 | 196 | 0 | 54 | 92.19 |
| chr11 | 70828808  | 70829000  | chr9  | 72082192  | 72082385  | 193 | 194 | 0 | 0  | 87.05 |
| chr1  | 37012553  | 37012745  | chr1  | 37844740  | 37844932  | 193 | 193 | 0 | 0  | 84.21 |
| chr19 | 57615811  | 57616003  | chr20 | 55109114  | 55109306  | 193 | 193 | 0 | 20 | 84.21 |
| chrX  | 8832171   | 8832363   | chrX  | 9100187   | 9100379   | 193 | 193 | 0 | 23 | 94.3  |
| chr16 | 24527020  | 24527211  | chr18 | 25168494  | 25168772  | 192 | 279 | 0 | 9  | 97.79 |
| chr14 | 67232434  | 67232625  | chr15 | 66851656  | 66851854  | 192 | 199 | 0 | 0  | 97.92 |
| chr17 | 69432253  | 69432444  | chr19 | 72815263  | 72815454  | 192 | 192 | 0 | 50 | 91.15 |
| chr2  | 187262621 | 187262812 | chr13 | 77092907  | 77093098  | 192 | 192 | 0 | 0  | 100   |
| chrX  | 14705889  | 14706080  | chrX  | 15161552  | 15161742  | 192 | 191 | 0 | 0  | 89.53 |
| chr2  | 104808412 | 104808602 | chr12 | 107780507 | 107780697 | 191 | 191 | 0 | 0  | 94.76 |
| chr2  | 100614747 | 100614937 | chr12 | 103504945 | 103505134 | 191 | 190 | 0 | 0  | 96.84 |
| chr1  | 108143728 | 108143918 | chr1  | 107261432 | 107261596 | 191 | 165 | 0 | 49 | 89.87 |
| chr14 | 50209204  | 50209393  | chr15 | 49624803  | 49624995  | 190 | 193 | 0 | 1  | 97.37 |
| chr10 | 92855040  | 92855229  | chr8  | 94572500  | 94572689  | 190 | 190 | 0 | 0  | 95.26 |
| chr11 | 19427536  | 19427725  | chr9  | 19656036  | 19656221  | 190 | 186 | 0 | 0  | 93.41 |
| chr4  | 155836980 | 155837169 | chr3  | 173201431 | 173201613 | 190 | 183 | 0 | 42 | 91.8  |
| chr11 | 6485142   | 6485330   | chr9  | 6628568   | 6628760   | 189 | 193 | 0 | 0  | 99.47 |
| chr4  | 65136339  | 65136527  | chr3  | 81505328  | 81505516  | 189 | 189 | 0 | 0  | 98.41 |
| chrX  | 128056560 | 128056747 | chrX  | 132281797 | 132281983 | 188 | 187 | 0 | 0  | 100   |
| chr1  | 69076120  | 69076306  | chr1  | 67641139  | 67641325  | 187 | 187 | 0 | 0  | 94.65 |
| chr14 | 76101805  | 76101991  | chr15 | 76158002  | 76158188  | 187 | 187 | 0 | 26 | 96.79 |
| chr4  | 126872490 | 126872675 | chr3  | 143726816 | 143727001 | 186 | 186 | 0 | 3  | 94.62 |
| chr6  | 14395472  | 14395657  | chr5  | 14691245  | 14691430  | 186 | 186 | 0 | 1  | 98.39 |
| chr22 | 22937288  | 22937472  | chr23 | 21092736  | 21092921  | 185 | 186 | 0 | 88 | 93.51 |
| chr4  | 166033741 | 166033925 | chr3  | 183498083 | 183498267 | 185 | 185 | 0 | 10 | 95.32 |
| chr1  | 215328151 | 215328334 | chr1  | 199065323 | 199065506 | 184 | 184 | 0 | 0  | 99.45 |
| chr4  | 97869213  | 97869396  | chr3  | 114198126 | 114198309 | 184 | 184 | 0 | 9  | 98.37 |
| chr3  | 180175753 | 180175935 | chr2  | 183940304 | 183940486 | 183 | 183 | 0 | 30 | 93.99 |
| chr13 | 86154957  | 86155138  | chr14 | 68948607  | 68948802  | 182 | 196 | 0 | 0  | 93.41 |
| chr13 | 18464667  | 18464848  | chr14 | 17365300  | 17365482  | 182 | 183 | 0 | 0  | 91.06 |
| chr1  | 78762874  | 78763055  | chr1  | 77355275  | 77355456  | 182 | 182 | 0 | 4  | 99.45 |
| chr16 | 29798667  | 29798848  | chr18 | 30560215  | 30560396  | 182 | 182 | 0 | 0  | 95.6  |
| chr18 | 65022103  | 65022284  | chr17 | 61998385  | 61998566  | 182 | 182 | 0 | 49 | 97.14 |



|       |           |           |       |           |           |     |     |     |   |    |       |
|-------|-----------|-----------|-------|-----------|-----------|-----|-----|-----|---|----|-------|
| chr16 | 1064636   | 1064817   | chr18 | 1124260   | 1124440   | 182 |     | 181 | 0 | 0  | 93.92 |
| chr6  | 30647233  | 30647413  | chr5  | 31095647  | 31095827  | 181 |     | 181 | 0 | 0  | 94.48 |
| chr10 | 98511131  | 98511310  | chr8  | 100218884 | 100219516 | 180 | 633 | 0   | 0 | 0  | 86.05 |
| chr7  | 110130492 | 110130671 | chr6  | 112083254 | 112083433 | 180 |     | 180 | 0 | 0  | 97.78 |
| chr11 | 69468684  | 69468862  | chr9  | 70590129  | 70590307  | 179 |     | 179 | 0 | 0  | 96.65 |
| chr11 | 72036801  | 72036979  | chr9  | 73310080  | 73310258  | 179 |     | 179 | 0 | 0  | 95.53 |
| chr17 | 21091683  | 21091861  | chr19 | 21461673  | 21461851  | 179 |     | 179 | 0 | 0  | 93.85 |
| chr2  | 176498500 | 176498678 | chr13 | 66135344  | 66135522  | 179 |     | 179 | 0 | 0  | 98.88 |
| chrY  | 20889001  | 20889179  | chrY  | 21952958  | 21953132  | 179 |     | 175 | 0 | 11 | 95.43 |
| chr11 | 19138788  | 19138965  | chr9  | 19368747  | 19368927  | 178 |     | 181 | 0 | 0  | 95.51 |
| chr19 | 53342138  | 53342315  | chr20 | 50610483  | 50610660  | 178 |     | 178 | 0 | 0  | 97.19 |
| chr4  | 105103894 | 105104070 | chr3  | 121498337 | 121498521 | 177 |     | 185 | 0 | 0  | 94.35 |
| chr1  | 66188536  | 66188712  | chr1  | 64543443  | 64543621  | 177 |     | 179 | 0 | 2  | 96.61 |
| chr7  | 52570914  | 52571090  | chr6  | 54244223  | 54244400  | 177 |     | 178 | 0 | 0  | 96.05 |
| chr15 | 60243943  | 60244119  | chr16 | 60585610  | 60585786  | 177 |     | 177 | 0 | 72 | 91.48 |
| chr1  | 244226017 | 244226193 | chr1  | 228306775 | 228306950 | 177 |     | 176 | 0 | 0  | 89.94 |
| chr3  | 80723659  | 80723835  | chr2  | 82962602  | 82962773  | 177 |     | 172 | 0 | 1  | 98.84 |
| chrX  | 6991475   | 6991650   | chrX  | 6950377   | 6950552   | 176 |     | 176 | 0 | 41 | 95.45 |
| chrX  | 121730440 | 121730615 | chrX  | 125803239 | 125803412 | 176 |     | 174 | 0 | 0  | 81.61 |
| chr9  | 5221123   | 5221298   | chr11 | 5130619   | 5130786   | 176 |     | 168 | 0 | 0  | 84.31 |
| chr1  | 40144530  | 40144704  | chr1  | 41030571  | 41030745  | 175 |     | 175 | 0 | 0  | 96.57 |
| chrX  | 128651027 | 128651201 | chrX  | 132890666 | 132890839 | 175 |     | 174 | 0 | 0  | 85.45 |
| chr5  | 12415808  | 12415982  | chr4  | 12818185  | 12818351  | 175 |     | 167 | 0 | 0  | 100   |
| chr2  | 22699740  | 22699913  | chr12 | 23579851  | 23580251  | 174 |     | 401 | 0 | 0  | 93.33 |
| chr5  | 11392398  | 11392571  | chr4  | 11800424  | 11800597  | 174 |     | 174 | 0 | 0  | 98.85 |
| chr16 | 71925762  | 71925934  | chr18 | 66299355  | 66299527  | 173 |     | 173 | 0 | 0  | 90.75 |
| chr7  | 71410484  | 71410656  | chr6  | 73372438  | 73372608  | 173 |     | 171 | 0 | 0  | 86.98 |
| chr8  | 2566660   | 2566831   | chr7  | 2719294   | 2719465   | 172 |     | 172 | 0 | 5  | 89.53 |
| chr6  | 27350378  | 27350549  | chr5  | 27848232  | 27848394  | 172 |     | 163 | 0 | 9  | 84.66 |
| chr16 | 68526148  | 68526318  | chr18 | 62876992  | 62877162  | 171 |     | 171 | 0 | 0  | 92.4  |
| chr13 | 90758959  | 90759129  | chr14 | 73730660  | 73730815  | 171 |     | 156 | 0 | 42 | 97.44 |
| chr4  | 107193024 | 107193194 | chr3  | 123639535 | 123639679 | 171 |     | 145 | 0 | 54 | 95.8  |
| chr14 | 53373199  | 53373367  | chr15 | 52825966  | 52826135  | 169 |     | 170 | 0 | 11 | 82.25 |
| chr14 | 30056259  | 30056427  | chr15 | 29192933  | 29193101  | 169 |     | 169 | 0 | 19 | 100   |
| chr2  | 227577488 | 227577655 | chr13 | 118178987 | 118179163 | 168 |     | 177 | 0 | 11 | 87.12 |
| chr11 | 116514073 | 116514239 | chr9  | 118583053 | 118583219 | 167 |     | 167 | 0 | 0  | 97.6  |
| chr7  | 114791781 | 114791947 | chr6  | 117072595 | 117072761 | 167 |     | 167 | 0 | 0  | 88.02 |
| chr15 | 89002567  | 89002733  | chr16 | 89948906  | 89949069  | 167 |     | 164 | 0 | 0  | 92.07 |
| chr1  | 33514766  | 33514932  | chr1  | 34251929  | 34252087  | 167 |     | 159 | 0 | 22 | 93.71 |
| chr3  | 9915141   | 9915306   | chr2  | 10300422  | 10300593  | 166 |     | 172 | 0 | 0  | 91.52 |
| chr5  | 100129956 | 100130119 | chr4  | 105911888 | 105912058 | 164 |     | 171 | 0 | 0  | 97.56 |
| chr1  | 93938407  | 93938570  | chr1  | 92922493  | 92922656  | 164 |     | 164 | 0 | 53 | 90.24 |
| chr4  | 8221157   | 8221320   | chr3  | 8295540   | 8295703   | 164 |     | 164 | 0 | 0  | 85.28 |
| chr7  | 149013579 | 149013742 | chr6  | 151845643 | 151845806 | 164 |     | 164 | 0 | 0  | 98.17 |
| chr3  | 82286077  | 82286239  | chr2  | 84522094  | 84522256  | 163 |     | 163 | 0 | 0  | 99.39 |
| chr7  | 77343889  | 77344051  | chr6  | 78442718  | 78442880  | 163 |     | 163 | 0 | 0  | 93.25 |
| chr11 | 122113391 | 122113553 | chr9  | 124153464 | 124153625 | 163 |     | 162 | 0 | 4  | 98.15 |
| chr7  | 16547484  | 16547646  | chr6  | 17423144  | 17423291  | 163 |     | 148 | 0 | 56 | 89.86 |
| chr9  | 21423241  | 21423402  | chr11 | 21589109  | 21589571  | 162 |     | 463 | 0 | 0  | 87.16 |
| chr20 | 46616227  | 46616388  | chr21 | 49225235  | 49225393  | 162 |     | 159 | 0 | 0  | 92.9  |
| chr13 | 42541997  | 42542157  | chr14 | 42232097  | 42232632  | 161 |     | 536 | 0 | 0  | 90.58 |
| chr12 | 51297947  | 51298107  | chr10 | 52523553  | 52523715  | 161 |     | 163 | 0 | 0  | 86.34 |
| chr6  | 94783813  | 94783973  | chr5  | 96535797  | 96535957  | 161 |     | 161 | 0 | 41 | 94.41 |

|       |           |           |       |           |           |     |      |   |    |       |
|-------|-----------|-----------|-------|-----------|-----------|-----|------|---|----|-------|
| chr8  | 114666412 | 114666572 | chr7  | 117187697 | 117187853 | 161 | 157  | 0 | 0  | 83.44 |
| chr12 | 113433271 | 113433431 | chr10 | 116153399 | 116153548 | 161 | 150  | 0 | 78 | 86.3  |
| chrX  | 35240989  | 35241148  | chrX  | 36590163  | 36590333  | 160 | 171  | 0 | 13 | 94.38 |
| chr1  | 181689578 | 181689737 | chr1  | 164258649 | 164258809 | 160 | 161  | 0 | 0  | 83.12 |
| chr1  | 3712839   | 3712998   | chr1  | 3566667   | 3566826   | 160 | 160  | 0 | 0  | 89.38 |
| chr6  | 6467206   | 6467365   | chr5  | 6832272   | 6832429   | 160 | 158  | 0 | 0  | 98.73 |
| chr14 | 73314839  | 73314998  | chr15 | 73098042  | 73098198  | 160 | 157  | 0 | 0  | 89.54 |
| chr21 | 31631432  | 31631591  | chr22 | 31599198  | 31599353  | 160 | 156  | 0 | 0  | 90.38 |
| chr8  | 1705502   | 1705660   | chr7  | 1785222   | 1785380   | 159 | 159  | 0 | 0  | 99.37 |
| chr10 | 104491132 | 104491290 | chr8  | 106245410 | 106245566 | 159 | 157  | 0 | 2  | 94.87 |
| chr2  | 205463415 | 205463572 | chr13 | 95483199  | 95483356  | 158 | 158  | 0 | 0  | 94.3  |
| chr2  | 236060835 | 236060992 | chr13 | 126785477 | 126785634 | 158 | 158  | 0 | 0  | 93.04 |
| chr8  | 67568338  | 67568495  | chr7  | 69577675  | 69577832  | 158 | 158  | 0 | 0  | 100   |
| chr19 | 53056399  | 53056555  | chr20 | 50317226  | 50317430  | 157 | 205  | 0 | 0  | 83.44 |
| chr10 | 29326077  | 29326233  | chr8  | 29674863  | 29675030  | 157 | 168  | 0 | 0  | 87.26 |
| chrX  | 150100730 | 150100886 | chrX  | 155399717 | 155399874 | 157 | 158  | 0 | 24 | 83.44 |
| chr13 | 66783979  | 66784135  | chr14 | 49179917  | 49180073  | 157 | 157  | 0 | 0  | 98.73 |
| chr6  | 86971288  | 86971444  | chr5  | 88676075  | 88676231  | 157 | 157  | 0 | 1  | 97.45 |
| chr20 | 32507822  | 32507978  | chr21 | 34516240  | 34516392  | 157 | 153  | 0 | 0  | 96.03 |
| chr6  | 167252931 | 167253086 | chr5  | 171609339 | 171609495 | 156 | 157  | 0 | 21 | 85.9  |
| chr5  | 119186456 | 119186611 | chr4  | 125419844 | 125419999 | 156 | 156  | 0 | 0  | 95.51 |
| chr10 | 7182872   | 7183027   | chr8  | 7287504   | 7287658   | 156 | 155  | 0 | 2  | 89.03 |
| chrX  | 3335009   | 3335164   | chrX  | 3098555   | 3098706   | 156 | 152  | 0 | 0  | 89.47 |
| chr16 | 27949423  | 27949577  | chr18 | 28648258  | 28648412  | 155 | 155  | 0 | 61 | 98.06 |
| chr2  | 77137794  | 77137948  | chr12 | 79928535  | 79928689  | 155 | 155  | 0 | 26 | 94.84 |
| chr7  | 117944912 | 117945066 | chr6  | 120261783 | 120261937 | 155 | 155  | 0 | 20 | 84.52 |
| chr17 | 24502037  | 24502190  | chr19 | 27850250  | 27850408  | 154 | 159  | 0 | 0  | 94.16 |
| chr4  | 256818    | 256971    | chr3  | 252230    | 252387    | 154 | 158  | 0 | 0  | 83.77 |
| chr11 | 93688501  | 93688654  | chr9  | 95589807  | 95589960  | 154 | 154  | 0 | 0  | 98.7  |
| chr20 | 57347040  | 57347193  | chr21 | 60366280  | 60366433  | 154 | 154  | 0 | 41 | 100   |
| chr6  | 78793908  | 78794061  | chr5  | 80229291  | 80229444  | 154 | 154  | 0 | 0  | 99.35 |
| chr3  | 125892323 | 125892475 | chr2  | 127718878 | 127719030 | 153 | 153  | 0 | 42 | 99.35 |
| chr5  | 168102074 | 168102226 | chr4  | 175320939 | 175321091 | 153 | 153  | 0 | 0  | 98.69 |
| chr6  | 97793236  | 97793387  | chr5  | 99757466  | 99757937  | 152 | 472  | 0 | 0  | 94.67 |
| chr3  | 128938668 | 128938819 | chr2  | 130814301 | 130814452 | 152 | 152  | 0 | 60 | 90.79 |
| chrX  | 81135464  | 81135615  | chrX  | 83675759  | 83675896  | 152 | 138  | 0 | 43 | 91.11 |
| chr11 | 25876225  | 25876375  | chr9  | 26170571  | 26170723  | 151 | 153  | 0 | 47 | 99.34 |
| chr11 | 4924732   | 4924882   | chr9  | 4905915   | 4906065   | 151 | 151  | 0 | 0  | 77.48 |
| chr2  | 57490873  | 57491023  | chr12 | 59589906  | 59590054  | 151 | 149  | 0 | 4  | 100   |
| chr19 | 46880401  | 46880550  | chr20 | 43837614  | 43838786  | 150 | 1173 | 0 | 0  | 83.16 |
| chr19 | 2495976   | 2496125   | chr20 | 2711747   | 2711898   | 150 | 152  | 0 | 0  | 94    |
| chr19 | 2586362   | 2586511   | chr20 | 2631917   | 2632064   | 150 | 148  | 0 | 0  | 82.43 |
| chr15 | 83320279  | 83320427  | chr16 | 84033920  | 84034067  | 149 | 148  | 0 | 0  | 87.84 |
| chr11 | 33668022  | 33668169  | chr9  | 34051434  | 34051586  | 148 | 153  | 0 | 0  | 88.36 |
| chr12 | 91257237  | 91257384  | chr10 | 93432386  | 93432537  | 148 | 152  | 0 | 0  | 93.92 |
| chr12 | 76245704  | 76245851  | chr10 | 77781629  | 77781776  | 148 | 148  | 0 | 49 | 99.32 |
| chr14 | 47972799  | 47972946  | chr15 | 47343202  | 47343348  | 148 | 147  | 0 | 3  | 92.52 |
| chrX  | 130690637 | 130690783 | chrX  | 134945751 | 134945915 | 147 | 165  | 0 | 0  | 79.45 |
| chr13 | 105806005 | 105806151 | chr14 | 89209435  | 89209581  | 147 | 147  | 0 | 0  | 90.48 |
| chr19 | 57832022  | 57832168  | chr20 | 55248042  | 55248188  | 147 | 147  | 0 | 67 | 91.84 |
| chr20 | 5502021   | 5502167   | chr21 | 5487022   | 5487168   | 147 | 147  | 0 | 10 | 98.64 |
| chr8  | 876482    | 876628    | chr7  | 924726    | 924872    | 147 | 147  | 0 | 0  | 97.28 |
| chr16 | 3797266   | 3797411   | chr18 | 3661926   | 3662071   | 146 | 146  | 0 | 0  | 98.63 |

|       |           |           |       |           |           |     |     |   |    |       |
|-------|-----------|-----------|-------|-----------|-----------|-----|-----|---|----|-------|
| chr18 | 69215538  | 69215683  | chr17 | 66378011  | 66378156  | 146 | 146 | 0 | 0  | 94.52 |
| chr9  | 108884845 | 108884989 | chr11 | 93417084  | 93417257  | 145 | 174 | 0 | 22 | 88.97 |
| chr11 | 42337395  | 42337539  | chr9  | 42811330  | 42811495  | 145 | 166 | 0 | 53 | 99.31 |
| chr19 | 57833290  | 57833434  | chr20 | 55246860  | 55247009  | 145 | 150 | 0 | 0  | 84.83 |
| chr11 | 132372684 | 132372828 | chr9  | 134543911 | 134544055 | 145 | 145 | 0 | 0  | 97.24 |
| chr19 | 2044332   | 2044476   | chr20 | 2154203   | 2154347   | 145 | 145 | 0 | 0  | 95.17 |
| chr2  | 75227541  | 75227685  | chr12 | 77633749  | 77633893  | 145 | 145 | 0 | 0  | 96.55 |
| chrX  | 146078312 | 146078456 | chrX  | 151257054 | 151257198 | 145 | 145 | 0 | 0  | 97.93 |
| chr8  | 138801320 | 138801464 | chr7  | 141783271 | 141783412 | 145 | 142 | 0 | 0  | 97.18 |
| chr1  | 188522225 | 188522368 | chr1  | 171088101 | 171088245 | 144 | 145 | 0 | 0  | 83.92 |
| chr11 | 15961188  | 15961331  | chr9  | 16167560  | 16167675  | 144 | 116 | 0 | 0  | 94.83 |
| chr3  | 183932800 | 183932942 | chr2  | 187808958 | 187809101 | 143 | 144 | 0 | 0  | 86.62 |
| chr1  | 201910290 | 201910431 | chr1  | 184863443 | 184863584 | 142 | 142 | 0 | 0  | 99.3  |
| chr9  | 85424726  | 85424867  | chr11 | 69474995  | 69475136  | 142 | 142 | 0 | 0  | 96.48 |
| chr19 | 60828088  | 60828229  | chr20 | 58272207  | 58272311  | 142 | 105 | 0 | 47 | 79.05 |
| chr4  | 38298611  | 38298751  | chr3  | 40970658  | 40970809  | 141 | 152 | 0 | 0  | 92.91 |
| chr16 | 9224259   | 9224399   | chr18 | 9355026   | 9355166   | 141 | 141 | 0 | 0  | 89.36 |
| chr5  | 177778778 | 177778918 | chr4  | 185287494 | 185287634 | 141 | 141 | 0 | 0  | 90    |
| chr6  | 34286789  | 34286929  | chr5  | 34737047  | 34737187  | 141 | 141 | 0 | 25 | 99.29 |
| chr9  | 102982367 | 102982507 | chr11 | 87245318  | 87245458  | 141 | 141 | 0 | 0  | 90.78 |
| chr9  | 135034511 | 135034651 | chr11 | 119873162 | 119873302 | 141 | 141 | 0 | 61 | 97.16 |
| chr13 | 112329733 | 112329873 | chr14 | 95940754  | 95940890  | 141 | 137 | 0 | 1  | 91.97 |
| chr22 | 36384008  | 36384147  | chr23 | 36559279  | 36559418  | 140 | 140 | 0 | 2  | 93.57 |
| chr11 | 116512818 | 116512957 | chr9  | 118584331 | 118584469 | 140 | 139 | 0 | 28 | 98.55 |
| chrX  | 21581982  | 21582121  | chrX  | 22345034  | 22345166  | 140 | 133 | 0 | 0  | 89.47 |
| chr2  | 228414656 | 228414795 | chr13 | 119014989 | 119015104 | 140 | 116 | 0 | 0  | 94.83 |
| chr20 | 35920566  | 35920704  | chr21 | 38291240  | 38291378  | 139 | 139 | 0 | 0  | 95.65 |
| chr19 | 39763319  | 39763457  | chr20 | 36417158  | 36417295  | 139 | 138 | 0 | 75 | 92.75 |
| chr7  | 118306227 | 118306365 | chr6  | 120308092 | 120308229 | 139 | 138 | 0 | 0  | 78.2  |
| chr2  | 141339667 | 141339805 | chr13 | 30368331  | 30368467  | 139 | 137 | 0 | 65 | 94.4  |
| chrX  | 6947723   | 6947861   | chrX  | 6909419   | 6909555   | 139 | 137 | 0 | 0  | 74.45 |
| chr3  | 128578682 | 128578820 | chr2  | 130455392 | 130455515 | 139 | 124 | 0 | 45 | 95.16 |
| chr1  | 68832216  | 68832353  | chr1  | 67395211  | 67395348  | 138 | 138 | 0 | 62 | 95.65 |
| chr13 | 21216355  | 21216492  | chr14 | 20379764  | 20379901  | 138 | 138 | 0 | 0  | 94.93 |
| chr11 | 59863345  | 59863482  | chr9  | 60600996  | 60601132  | 138 | 137 | 0 | 56 | 91.11 |
| chr2  | 219049904 | 219050040 | chr13 | 109205786 | 109205923 | 137 | 138 | 0 | 2  | 89.05 |
| chrX  | 35624023  | 35624159  | chrX  | 36919637  | 36919774  | 137 | 138 | 0 | 0  | 82.48 |
| chr4  | 123352382 | 123352518 | chr3  | 140188304 | 140188440 | 137 | 137 | 0 | 0  | 96.35 |
| chr2  | 80573531  | 80573666  | chr12 | 83389412  | 83389547  | 136 | 136 | 0 | 0  | 97.06 |
| chr6  | 124730688 | 124730823 | chr5  | 127255302 | 127255437 | 136 | 136 | 0 | 23 | 99.26 |
| chr4  | 171630449 | 171630583 | chr3  | 189298799 | 189298940 | 135 | 142 | 0 | 0  | 94.81 |
| chr10 | 56440423  | 56440557  | chr8  | 57371148  | 57371286  | 135 | 139 | 0 | 0  | 99.26 |
| chr1  | 185708293 | 185708427 | chr1  | 168279683 | 168279817 | 135 | 135 | 0 | 0  | 93.18 |
| chr3  | 128429139 | 128429273 | chr2  | 130258739 | 130258869 | 135 | 131 | 0 | 0  | 87.69 |
| chr8  | 106889337 | 106889470 | chr7  | 109325452 | 109325591 | 134 | 140 | 0 | 0  | 85.82 |
| chr1  | 105341314 | 105341447 | chr1  | 104277320 | 104277453 | 134 | 134 | 0 | 0  | 83.33 |
| chr13 | 33053773  | 33053906  | chr14 | 32256415  | 32256548  | 134 | 134 | 0 | 0  | 92.54 |
| chr14 | 39937257  | 39937390  | chr15 | 39277879  | 39278012  | 134 | 134 | 0 | 0  | 99.25 |
| chr16 | 24253882  | 24254015  | chr18 | 24891280  | 24891413  | 134 | 134 | 0 | 41 | 92.54 |
| chr7  | 113375773 | 113375906 | chr6  | 115417325 | 115417454 | 134 | 130 | 0 | 0  | 98.46 |
| chrX  | 104382801 | 104382934 | chrX  | 107842105 | 107842231 | 134 | 127 | 0 | 0  | 88.98 |
| chr2  | 143564201 | 143564333 | chr13 | 32607776  | 32607916  | 133 | 141 | 0 | 9  | 92.48 |
| chr14 | 61574587  | 61574719  | chr15 | 61143072  | 61143206  | 133 | 135 | 0 | 0  | 87.9  |

|       |           |           |       |           |           |     |     |   |    |       |
|-------|-----------|-----------|-------|-----------|-----------|-----|-----|---|----|-------|
| chr1  | 222385121 | 222385253 | chr1  | 206209622 | 206209754 | 133 | 133 | 0 | 0  | 90.23 |
| chr2  | 115513986 | 115514118 | chr13 | 1527264   | 1527396   | 133 | 133 | 0 | 40 | 96.24 |
| chr6  | 141661983 | 141662115 | chr5  | 144560012 | 144560144 | 133 | 133 | 0 | 0  | 98.5  |
| chr9  | 135149889 | 135150021 | chr11 | 120039201 | 120039333 | 133 | 133 | 0 | 0  | 95.49 |
| chr1  | 226462087 | 226462218 | chr1  | 210309939 | 210310075 | 132 | 137 | 0 | 0  | 93.89 |
| chr6  | 78371556  | 78371687  | chr5  | 79800141  | 79800274  | 132 | 134 | 0 | 0  | 93.18 |
| chr10 | 132476001 | 132476132 | chr8  | 135189667 | 135189797 | 132 | 131 | 0 | 0  | 96.95 |
| chrX  | 67033302  | 67033432  | chrX  | 69070358  | 69070490  | 131 | 133 | 0 | 0  | 93.13 |
| chrX  | 84152421  | 84152551  | chrX  | 86796583  | 86796715  | 131 | 133 | 0 | 2  | 95.16 |
| chr15 | 43697607  | 43697737  | chr16 | 43645304  | 43645434  | 131 | 131 | 0 | 1  | 96.95 |
| chr16 | 73978238  | 73978368  | chr18 | 68376167  | 68376297  | 131 | 131 | 0 | 0  | 91.6  |
| chr2  | 126834986 | 126835116 | chr13 | 12928119  | 12928249  | 131 | 131 | 0 | 0  | 98.47 |
| chr9  | 137260037 | 137260167 | chr11 | 122074471 | 122074601 | 131 | 131 | 0 | 43 | 97.71 |
| chr20 | 30573956  | 30574086  | chr21 | 32272703  | 32272832  | 131 | 130 | 0 | 0  | 91.54 |
| chr10 | 132828459 | 132828588 | chr8  | 135556758 | 135556902 | 130 | 145 | 0 | 0  | 91.41 |
| chr3  | 135058185 | 135058314 | chr2  | 137212613 | 137212743 | 130 | 131 | 0 | 0  | 96.15 |
| chr19 | 62976975  | 62977104  | chr20 | 60647699  | 60647827  | 130 | 129 | 0 | 0  | 80.17 |
| chr4  | 163381483 | 163381611 | chr3  | 180828808 | 180829028 | 129 | 221 | 0 | 49 | 92.97 |
| chr15 | 91519693  | 91519821  | chr16 | 92495572  | 92495700  | 129 | 129 | 0 | 1  | 90.7  |
| chr6  | 101214450 | 101214578 | chr5  | 103194566 | 103194694 | 129 | 129 | 0 | 0  | 93.8  |
| chr3  | 175096593 | 175096720 | chr2  | 178678750 | 178678880 | 128 | 131 | 0 | 0  | 85.16 |
| chr11 | 31049678  | 31049805  | chr9  | 31383872  | 31383999  | 128 | 128 | 0 | 7  | 91.41 |
| chr2  | 82511102  | 82511229  | chr12 | 85343516  | 85343643  | 128 | 128 | 0 | 0  | 97.66 |
| chr2  | 150970923 | 150971050 | chr13 | 40025740  | 40025867  | 128 | 128 | 0 | 0  | 100   |
| chr3  | 124577756 | 124577883 | chr2  | 126277582 | 126277709 | 128 | 128 | 0 | 0  | 92.19 |
| chrX  | 43581698  | 43581825  | chrX  | 45023394  | 45023521  | 128 | 128 | 0 | 0  | 85.94 |
| chrX  | 37381039  | 37381165  | chrX  | 38483251  | 38483378  | 127 | 128 | 0 | 0  | 83.46 |
| chr1  | 207473116 | 207473242 | chr1  | 191083070 | 191083196 | 127 | 127 | 0 | 18 | 100   |
| chr11 | 5657116   | 5657242   | chr9  | 5809564   | 5809685   | 127 | 122 | 0 | 0  | 74.78 |
| chr19 | 44431275  | 44431401  | chr20 | 41390860  | 41390980  | 127 | 121 | 0 | 0  | 97.52 |
| chr21 | 38499164  | 38499290  | chr22 | 39166942  | 39167059  | 127 | 118 | 0 | 0  | 91.89 |
| chr16 | 86671116  | 86671241  | chr18 | 81639607  | 81639734  | 126 | 128 | 0 | 0  | 99.21 |
| chr3  | 6367679   | 6367804   | chr2  | 6582977   | 6583103   | 126 | 127 | 0 | 0  | 88.89 |
| chr13 | 102436178 | 102436303 | chr14 | 85827368  | 85827493  | 126 | 126 | 0 | 0  | 91.27 |
| chr19 | 48560172  | 48560297  | chr20 | 45469700  | 45469825  | 126 | 126 | 0 | 19 | 96.8  |
| chr3  | 69945219  | 69945344  | chr2  | 71754695  | 71754820  | 126 | 126 | 0 | 0  | 87.3  |
| chr11 | 4799873   | 4799997   | chr9  | 4824382   | 4824506   | 125 | 125 | 0 | 0  | 81.6  |
| chr11 | 42745732  | 42745856  | chr9  | 43225896  | 43226020  | 125 | 125 | 0 | 0  | 88.8  |
| chr12 | 111537987 | 111538111 | chr10 | 114236614 | 114236738 | 125 | 125 | 0 | 0  | 89.6  |
| chr13 | 104447844 | 104447968 | chr14 | 87852231  | 87852355  | 125 | 125 | 0 | 0  | 94.4  |
| chrX  | 9275329   | 9275452   | chrX  | 9591576   | 9591709   | 124 | 134 | 0 | 0  | 94.31 |
| chr1  | 231579103 | 231579226 | chr1  | 215400109 | 215400232 | 124 | 124 | 0 | 0  | 96.77 |
| chr7  | 37927227  | 37927350  | chr6  | 39118836  | 39118959  | 124 | 124 | 0 | 21 | 93.55 |
| chr14 | 65398909  | 65399031  | chr15 | 65001649  | 65001771  | 123 | 123 | 0 | 0  | 94.31 |
| chr4  | 96649338  | 96649460  | chr3  | 112943838 | 112943960 | 123 | 123 | 0 | 0  | 98.37 |
| chr4  | 139261019 | 139261141 | chr3  | 156436842 | 156436964 | 123 | 123 | 0 | 0  | 95.12 |
| chr11 | 46127235  | 46127356  | chr9  | 46630624  | 46630803  | 122 | 180 | 0 | 0  | 97.52 |
| chr9  | 135192451 | 135192572 | chr11 | 120081561 | 120081712 | 122 | 152 | 0 | 0  | 93.33 |
| chr2  | 131318123 | 131318244 | chr13 | 17206751  | 17206873  | 122 | 123 | 0 | 0  | 90.98 |
| chr11 | 6746121   | 6746242   | chr9  | 6908108   | 6908229   | 122 | 122 | 0 | 0  | 90.18 |
| chrX  | 62763846  | 62763967  | chrX  | 64556207  | 64556328  | 122 | 122 | 0 | 0  | 96.72 |
| chr14 | 93746419  | 93746539  | chr15 | 94194568  | 94194690  | 121 | 123 | 0 | 0  | 96.69 |
| chrX  | 35423827  | 35423947  | chrX  | 36775983  | 36776103  | 121 | 121 | 0 | 6  | 89.26 |

|       |           |           |       |           |           |     |     |   |    |       |
|-------|-----------|-----------|-------|-----------|-----------|-----|-----|---|----|-------|
| chrX  | 77670811  | 77670931  | chrX  | 80155082  | 80155201  | 121 | 120 | 0 | 0  | 98.32 |
| chrX  | 130687614 | 130687734 | chrX  | 134945919 | 134946024 | 121 | 106 | 0 | 0  | 81.13 |
| chr8  | 37482513  | 37482632  | chr7  | 38704730  | 38704851  | 120 | 122 | 0 | 0  | 85.83 |
| chr9  | 6039070   | 6039189   | chr11 | 5965070   | 5965191   | 120 | 122 | 0 | 0  | 94.12 |
| chr5  | 125881312 | 125881431 | chr4  | 132212606 | 132212725 | 120 | 120 | 0 | 70 | 83.33 |
| chr6  | 37130125  | 37130244  | chr5  | 37606978  | 37607097  | 120 | 120 | 0 | 0  | 98.33 |
| chr6  | 115785592 | 115785711 | chr5  | 118129682 | 118129801 | 120 | 120 | 0 | 18 | 97.5  |
| chr19 | 33242344  | 33242462  | chr20 | 29422463  | 29422585  | 119 | 123 | 0 | 0  | 80.67 |
| chrX  | 99997016  | 99997134  | chrX  | 103255440 | 103255561 | 119 | 122 | 0 | 0  | 90.76 |
| chr6  | 32669576  | 32669694  | chr5  | 33124719  | 33124838  | 119 | 120 | 0 | 0  | 91.6  |
| chr21 | 39806178  | 39806296  | chr22 | 39847879  | 39847997  | 119 | 119 | 0 | 0  | 92.44 |
| chrX  | 116626112 | 116626230 | chrX  | 120573263 | 120573377 | 119 | 115 | 0 | 0  | 87.72 |
| chr3  | 79029433  | 79029550  | chr2  | 81247582  | 81247703  | 118 | 122 | 0 | 37 | 91.53 |
| chr13 | 99420703  | 99420820  | chr14 | 82762397  | 82762516  | 118 | 120 | 0 | 3  | 86.67 |
| chr3  | 28726355  | 28726472  | chr2  | 29669228  | 29669345  | 118 | 118 | 0 | 86 | 88.98 |
| chr12 | 40902521  | 40902638  | chr10 | 41500275  | 41500391  | 118 | 117 | 0 | 0  | 82.46 |
| chr21 | 30778603  | 30778720  | chr22 | 30775031  | 30775143  | 118 | 113 | 0 | 5  | 95.58 |
| chr8  | 79278447  | 79278563  | chr7  | 81399492  | 81399609  | 117 | 118 | 0 | 0  | 91.45 |
| chr7  | 18248427  | 18248543  | chr6  | 19154385  | 19154501  | 117 | 117 | 0 | 78 | 91.45 |
| chr3  | 185498313 | 185498429 | chr2  | 189454777 | 189454890 | 117 | 114 | 0 | 0  | 100   |
| chrX  | 135812059 | 135812175 | chrX  | 140465540 | 140465652 | 117 | 113 | 0 | 0  | 86.24 |
| chr2  | 186192034 | 186192149 | chr13 | 76006518  | 76006634  | 116 | 117 | 0 | 41 | 90.18 |
| chr3  | 160103702 | 160103817 | chr2  | 163284067 | 163284183 | 116 | 117 | 0 | 0  | 97.41 |
| chr6  | 112375533 | 112375648 | chr5  | 114721691 | 114721807 | 116 | 117 | 0 | 0  | 89.66 |
| chr19 | 47777935  | 47778050  | chr20 | 44767233  | 44767348  | 116 | 116 | 0 | 78 | 87.93 |
| chr2  | 224061428 | 224061543 | chr13 | 114653717 | 114653832 | 116 | 116 | 0 | 0  | 93.1  |
| chr2  | 238835880 | 238835995 | chr13 | 129779096 | 129779210 | 116 | 115 | 0 | 0  | 87.83 |
| chr7  | 98965208  | 98965322  | chr6  | 100860118 | 100860236 | 115 | 119 | 0 | 0  | 80.95 |
| chr2  | 129115899 | 129116013 | chr13 | 15249309  | 15249424  | 115 | 116 | 0 | 7  | 89.57 |
| chr1  | 225615996 | 225616110 | chr1  | 209437120 | 209437234 | 115 | 115 | 0 | 0  | 97.39 |
| chrX  | 83971853  | 83971967  | chrX  | 86595936  | 86596050  | 115 | 115 | 0 | 0  | 92.17 |
| chr7  | 118296532 | 118296646 | chr6  | 120317559 | 120317672 | 115 | 114 | 0 | 0  | 84.16 |
| chr19 | 14853054  | 14853167  | chr20 | 15538669  | 15538842  | 114 | 174 | 0 | 0  | 80.7  |
| chr12 | 103325843 | 103325956 | chr10 | 105803185 | 105803298 | 114 | 114 | 0 | 0  | 100   |
| chr2  | 145462898 | 145463011 | chr13 | 34500153  | 34500266  | 114 | 114 | 0 | 0  | 96.49 |
| chr6  | 107227357 | 107227470 | chr5  | 109387644 | 109387757 | 114 | 114 | 0 | 0  | 92.92 |
| chr5  | 178627320 | 178627432 | chr4  | 186133362 | 186134338 | 113 | 977 | 0 | 0  | 91.84 |
| chr4  | 153390959 | 153391071 | chr3  | 170710291 | 170710435 | 113 | 145 | 0 | 47 | 87.5  |
| chr2  | 163313008 | 163313120 | chr13 | 52712642  | 52712754  | 113 | 113 | 0 | 0  | 92.92 |
| chr4  | 164276243 | 164276355 | chr3  | 181732394 | 181732506 | 113 | 113 | 0 | 1  | 96.46 |
| chr10 | 107217518 | 107217630 | chr8  | 109019523 | 109019634 | 113 | 112 | 0 | 28 | 100   |
| chr15 | 50973769  | 50973881  | chr16 | 51050113  | 51050223  | 113 | 111 | 0 | 0  | 93.69 |
| chr1  | 196312313 | 196312425 | chr1  | 178999697 | 178999804 | 113 | 108 | 0 | 41 | 98.15 |
| chr12 | 123537412 | 123537523 | chr10 | 126609309 | 126609423 | 112 | 115 | 0 | 0  | 93.75 |
| chr2  | 204779501 | 204779612 | chr13 | 94780839  | 94780952  | 112 | 114 | 0 | 0  | 86.61 |
| chr8  | 34828264  | 34828375  | chr7  | 36023493  | 36023604  | 112 | 112 | 0 | 0  | 98.21 |
| chr9  | 122515337 | 122515448 | chr11 | 107228985 | 107229096 | 112 | 112 | 0 | 48 | 97.32 |
| chr9  | 74437243  | 74437354  | chr11 | 58267882  | 58267991  | 112 | 110 | 0 | 75 | 93.64 |
| chr5  | 168938136 | 168938246 | chr4  | 176201168 | 176201278 | 111 | 111 | 0 | 59 | 100   |
| chr7  | 117862978 | 117863088 | chr6  | 120168107 | 120168217 | 111 | 111 | 0 | 0  | 97.3  |
| chr3  | 22119406  | 22119515  | chr2  | 22997300  | 22997414  | 110 | 115 | 0 | 22 | 92.73 |
| chr4  | 93927356  | 93927465  | chr3  | 110044882 | 110044993 | 110 | 112 | 0 | 26 | 97.27 |
| chr8  | 20399945  | 20400054  | chr7  | 21291406  | 21291516  | 110 | 111 | 0 | 0  | 94.55 |

|       |           |           |       |           |           |     |     |   |    |       |
|-------|-----------|-----------|-------|-----------|-----------|-----|-----|---|----|-------|
| chr11 | 54864808  | 54864917  | chr9  | 55443672  | 55443781  | 110 | 110 | 0 | 0  | 97.27 |
| chr16 | 23056295  | 23056404  | chr18 | 23670454  | 23670563  | 110 | 110 | 0 | 13 | 94.55 |
| chr17 | 69228047  | 69228156  | chr19 | 72605522  | 72605631  | 110 | 110 | 0 | 0  | 81.82 |
| chr2  | 22562300  | 22562409  | chr12 | 23439726  | 23439835  | 110 | 110 | 0 | 0  | 99.09 |
| chr6  | 25839990  | 25840099  | chr5  | 26784644  | 26784753  | 110 | 110 | 0 | 0  | 91.82 |
| chrX  | 129585723 | 129585832 | chrX  | 133826783 | 133826892 | 110 | 110 | 0 | 0  | 94.55 |
| chr20 | 55092872  | 55092981  | chr21 | 58016696  | 58016804  | 110 | 109 | 0 | 0  | 91.74 |
| chr8  | 141205135 | 141205244 | chr7  | 144244527 | 144244635 | 110 | 109 | 0 | 0  | 98.17 |
| chr11 | 42223858  | 42223967  | chr9  | 42696827  | 42696933  | 110 | 107 | 0 | 0  | 90.65 |
| chr18 | 60865429  | 60865538  | chr17 | 57728039  | 57728136  | 110 | 98  | 0 | 4  | 84.69 |
| chr1  | 178332038 | 178332146 | chr1  | 160714405 | 160714518 | 109 | 114 | 0 | 0  | 95.41 |
| chr6  | 20683675  | 20683783  | chr5  | 21080557  | 21080665  | 109 | 109 | 0 | 0  | 93.52 |
| chrX  | 127268928 | 127269036 | chrX  | 131482764 | 131482865 | 109 | 102 | 0 | 0  | 89.22 |
| chr10 | 10434857  | 10434964  | chr8  | 10557455  | 10557564  | 108 | 110 | 0 | 0  | 91.67 |
| chr2  | 222968441 | 222968548 | chr13 | 113535682 | 113535789 | 108 | 108 | 0 | 0  | 94.44 |
| chr10 | 65728411  | 65728518  | chr8  | 66738566  | 66738672  | 108 | 107 | 0 | 0  | 83.96 |
| chr20 | 55852487  | 55852594  | chr21 | 58781959  | 58782064  | 108 | 106 | 0 | 0  | 92.45 |
| chr3  | 20362741  | 20362847  | chr2  | 21230311  | 21230421  | 107 | 111 | 0 | 18 | 100   |
| chr14 | 58220612  | 58220718  | chr15 | 57791272  | 57791378  | 107 | 107 | 0 | 10 | 99.07 |
| chr19 | 46880294  | 46880400  | chr20 | 43793394  | 43793500  | 107 | 107 | 0 | 0  | 85.42 |
| chr4  | 175736380 | 175736486 | chr3  | 193722952 | 193723058 | 107 | 107 | 0 | 0  | 94.39 |
| chr4  | 86821791  | 86821896  | chr3  | 102823800 | 102823905 | 106 | 106 | 0 | 0  | 83.81 |
| chr9  | 79669695  | 79669800  | chr11 | 63576262  | 63576367  | 106 | 106 | 0 | 0  | 97.17 |
| chrX  | 43390673  | 43390778  | chrX  | 44794317  | 44794422  | 106 | 106 | 0 | 0  | 93.4  |
| chr8  | 127715925 | 127716030 | chr7  | 130427497 | 130427601 | 106 | 105 | 0 | 1  | 93.33 |
| chr19 | 49484663  | 49484768  | chr20 | 46594354  | 46594453  | 106 | 100 | 0 | 0  | 76.04 |
| chr2  | 18693050  | 18693154  | chr12 | 19527822  | 19527930  | 105 | 109 | 0 | 0  | 92.38 |
| chr19 | 14800097  | 14800201  | chr20 | 15538506  | 15538612  | 105 | 107 | 0 | 0  | 72.38 |
| chr14 | 23114770  | 23114874  | chr15 | 22082567  | 22082671  | 105 | 105 | 0 | 0  | 87.62 |
| chr3  | 13108993  | 13109097  | chr2  | 13680855  | 13680959  | 105 | 105 | 0 | 8  | 92.38 |
| chr5  | 15501717  | 15501821  | chr4  | 15921168  | 15921272  | 105 | 105 | 0 | 10 | 98.1  |
| chr15 | 79465018  | 79465121  | chr16 | 80131058  | 80131161  | 104 | 104 | 0 | 0  | 91.35 |
| chr6  | 8929968   | 8930071   | chr5  | 9301907   | 9302010   | 104 | 104 | 0 | 0  | 100   |
| chr10 | 111249046 | 111249148 | chr8  | 113074403 | 113074507 | 103 | 105 | 0 | 0  | 84.16 |
| chr1  | 98592787  | 98592889  | chr1  | 97624766  | 97624868  | 103 | 103 | 0 | 0  | 98.06 |
| chr11 | 85523229  | 85523331  | chr9  | 87170029  | 87170131  | 103 | 103 | 0 | 0  | 99.03 |
| chr2  | 13910316  | 13910417  | chr12 | 14681157  | 14681258  | 102 | 102 | 0 | 2  | 97.06 |
| chr19 | 57521015  | 57521115  | chr20 | 55114274  | 55114379  | 101 | 106 | 0 | 0  | 80.2  |
| chr14 | 91087962  | 91088062  | chr15 | 91462555  | 91462655  | 101 | 101 | 0 | 0  | 98.02 |
| chr3  | 126165478 | 126165578 | chr2  | 127995567 | 127995667 | 101 | 101 | 0 | 0  | 94.06 |
| chr11 | 66167727  | 66167827  | chr9  | 67441606  | 67441703  | 101 | 98  | 0 | 0  | 84.44 |
| chr12 | 106613274 | 106613373 | chr10 | 109127183 | 109127282 | 100 | 100 | 0 | 0  | 99    |
| chr5  | 2308815   | 2308914   | chr4  | 2415278   | 2415377   | 100 | 100 | 0 | 0  | 98    |
| chr6  | 102037372 | 102037470 | chr5  | 104021672 | 104022502 | 99  | 831 | 0 | 0  | 100   |
| chr19 | 39903474  | 39903572  | chr20 | 36350581  | 36350681  | 99  | 101 | 0 | 0  | 91.92 |
| chr2  | 30237432  | 30237530  | chr12 | 31239584  | 31239682  | 99  | 99  | 0 | 0  | 89.9  |
| chr2  | 47326911  | 47327009  | chr12 | 49359512  | 49359610  | 99  | 99  | 0 | 4  | 96.97 |
| chr4  | 178028710 | 178028808 | chr3  | 196012917 | 196013015 | 99  | 99  | 0 | 0  | 92.93 |
| chrX  | 44474325  | 44474423  | chrX  | 45934051  | 45934149  | 99  | 99  | 0 | 14 | 96.97 |
| chrX  | 54697577  | 54697675  | chrX  | 55993208  | 55993306  | 99  | 99  | 0 | 0  | 88.89 |
| chr19 | 22408054  | 22408151  | chr20 | 23353153  | 23353303  | 98  | 151 | 0 | 36 | 85.71 |
| chr21 | 38499291  | 38499388  | chr22 | 39189416  | 39189516  | 98  | 101 | 0 | 0  | 90.82 |
| chr1  | 202402588 | 202402685 | chr1  | 185361977 | 185362074 | 98  | 98  | 0 | 0  | 92.86 |

|       |           |           |       |           |           |    |     |   |    |       |
|-------|-----------|-----------|-------|-----------|-----------|----|-----|---|----|-------|
| chr11 | 68839128  | 68839225  | chr9  | 69906837  | 69906934  | 98 | 98  | 0 | 0  | 86.73 |
| chr2  | 28058796  | 28058893  | chr12 | 29005853  | 29005950  | 98 | 98  | 0 | 0  | 84.69 |
| chr21 | 22751270  | 22751367  | chr22 | 22901255  | 22901352  | 98 | 98  | 0 | 76 | 97.96 |
| chr4  | 160028945 | 160029042 | chr3  | 177457952 | 177458049 | 98 | 98  | 0 | 36 | 92.86 |
| chr6  | 35265020  | 35265117  | chr5  | 35722724  | 35722821  | 98 | 98  | 0 | 0  | 97.96 |
| chr16 | 3170240   | 3170337   | chr18 | 3054237   | 3054333   | 98 | 97  | 0 | 0  | 84.78 |
| chr15 | 67417445  | 67417541  | chr16 | 68013754  | 68013852  | 97 | 99  | 0 | 76 | 93.68 |
| chr10 | 658392    | 658488    | chr8  | 718955    | 719051    | 97 | 97  | 0 | 0  | 86.6  |
| chr10 | 103885725 | 103885821 | chr8  | 105644500 | 105644596 | 97 | 97  | 0 | 0  | 91.75 |
| chr22 | 21795003  | 21795099  | chr23 | 21900216  | 21900312  | 97 | 97  | 0 | 0  | 90.72 |
| chr6  | 104244023 | 104244119 | chr5  | 106264349 | 106264445 | 97 | 97  | 0 | 0  | 94.85 |
| chrX  | 102022820 | 102022916 | chrX  | 105669108 | 105669204 | 97 | 97  | 0 | 0  | 83.51 |
| chr10 | 32091405  | 32091500  | chr8  | 32472103  | 32472201  | 96 | 99  | 0 | 0  | 90.43 |
| chr1  | 91913840  | 91913935  | chr1  | 90870499  | 90870594  | 96 | 96  | 0 | 0  | 100   |
| chr2  | 134805569 | 134805664 | chr13 | 23802065  | 23802160  | 96 | 96  | 0 | 0  | 100   |
| chr4  | 95237011  | 95237106  | chr3  | 111451872 | 111451967 | 96 | 96  | 0 | 6  | 98.96 |
| chr1  | 14322076  | 14322171  | chr1  | 14378857  | 14378951  | 96 | 95  | 0 | 0  | 94.74 |
| chr16 | 71695493  | 71695588  | chr18 | 66060757  | 66060851  | 96 | 95  | 0 | 0  | 89.47 |
| chr2  | 13583930  | 13584025  | chr12 | 14355073  | 14355165  | 96 | 93  | 0 | 3  | 94.62 |
| chr2  | 231633341 | 231633436 | chr13 | 122252296 | 122252388 | 96 | 93  | 0 | 7  | 79.76 |
| chr20 | 32590022  | 32590116  | chr21 | 34600546  | 34600640  | 95 | 95  | 0 | 0  | 94.74 |
| chr4  | 130966020 | 130966114 | chr3  | 147908586 | 147908680 | 95 | 95  | 0 | 0  | 94.74 |
| chr15 | 92433828  | 92433922  | chr16 | 93404793  | 93404884  | 95 | 92  | 0 | 0  | 92.39 |
| chrX  | 20191515  | 20191608  | chrX  | 20928012  | 20928106  | 94 | 95  | 0 | 0  | 90    |
| chr1  | 158185596 | 158185689 | chr1  | 140233414 | 140233507 | 94 | 94  | 0 | 0  | 94.68 |
| chr11 | 71949788  | 71949881  | chr9  | 73223438  | 73223531  | 94 | 94  | 0 | 0  | 84.04 |
| chr11 | 75711048  | 75711141  | chr9  | 77005306  | 77005399  | 94 | 94  | 0 | 0  | 92.55 |
| chr12 | 128374673 | 128374766 | chr10 | 131505504 | 131505597 | 94 | 94  | 0 | 0  | 97.87 |
| chr4  | 116259406 | 116259499 | chr3  | 132938375 | 132938468 | 94 | 94  | 0 | 24 | 96.81 |
| chrX  | 129606896 | 129606989 | chrX  | 133850847 | 133850940 | 94 | 94  | 0 | 0  | 89.25 |
| chr21 | 27062957  | 27063050  | chr22 | 27057528  | 27057620  | 94 | 93  | 0 | 4  | 91.4  |
| chr7  | 66713069  | 66713162  | chr6  | 68520704  | 68520795  | 94 | 92  | 0 | 0  | 90.22 |
| chr16 | 57710665  | 57710757  | chr18 | 51844661  | 51844759  | 93 | 99  | 0 | 0  | 86.96 |
| chr11 | 23002516  | 23002608  | chr9  | 23276856  | 23276949  | 93 | 94  | 0 | 0  | 90.32 |
| chr11 | 23925752  | 23925844  | chr9  | 24260031  | 24260123  | 93 | 93  | 0 | 0  | 100   |
| chr3  | 69046952  | 69047044  | chr2  | 70832958  | 70833050  | 93 | 93  | 0 | 0  | 93.55 |
| chr7  | 135115051 | 135115143 | chr6  | 137818166 | 137818258 | 93 | 93  | 0 | 0  | 96.77 |
| chr10 | 122437223 | 122437314 | chr8  | 124755763 | 124755878 | 92 | 116 | 0 | 0  | 96.74 |
| chr2  | 212693857 | 212693948 | chr13 | 102797011 | 102797102 | 92 | 92  | 0 | 28 | 100   |
| chr3  | 178582302 | 178582393 | chr2  | 182312214 | 182312305 | 92 | 92  | 0 | 0  | 94.57 |
| chr6  | 84072796  | 84072887  | chr5  | 85709245  | 85709336  | 92 | 92  | 0 | 0  | 100   |
| chr6  | 140638271 | 140638362 | chr5  | 143528582 | 143528673 | 92 | 92  | 0 | 0  | 91.3  |
| chr4  | 134461779 | 134461869 | chr3  | 151447480 | 151447566 | 91 | 87  | 0 | 0  | 98.84 |
| chr1  | 156627918 | 156628007 | chr1  | 138707033 | 138707125 | 90 | 93  | 0 | 59 | 88.89 |
| chr3  | 96204791  | 96204880  | chr2  | 97282180  | 97282269  | 90 | 90  | 0 | 29 | 91.11 |
| chr5  | 1253950   | 1254039   | chr4  | 1285117   | 1285206   | 90 | 90  | 0 | 0  | 90    |
| chr1  | 236485202 | 236485291 | chr1  | 220401014 | 220401098 | 90 | 85  | 0 | 0  | 79.76 |
| chr3  | 85836559  | 85836647  | chr2  | 88141592  | 88141681  | 89 | 90  | 0 | 0  | 94.38 |
| chr1  | 66377420  | 66377508  | chr1  | 64730442  | 64730530  | 89 | 89  | 0 | 0  | 97.75 |
| chr19 | 53219281  | 53219369  | chr20 | 50488376  | 50488464  | 89 | 89  | 0 | 0  | 95.51 |
| chr2  | 3788096   | 3788184   | chr12 | 4419214   | 4419302   | 89 | 89  | 0 | 87 | 82.02 |
| chr20 | 11466691  | 11466779  | chr21 | 11337666  | 11337754  | 89 | 89  | 0 | 68 | 96.63 |
| chr4  | 34391508  | 34391596  | chr3  | 34792995  | 34793083  | 89 | 89  | 0 | 0  | 95.51 |

|       |           |           |       |           |           |    |     |   |    |       |
|-------|-----------|-----------|-------|-----------|-----------|----|-----|---|----|-------|
| chr5  | 110649343 | 110649431 | chr4  | 116760867 | 116760955 | 89 | 89  | 0 | 0  | 98.88 |
| chr6  | 69459242  | 69459330  | chr5  | 70569697  | 70569785  | 89 | 89  | 0 | 0  | 98.88 |
| chr8  | 75000285  | 75000373  | chr7  | 77039920  | 77040007  | 89 | 88  | 0 | 0  | 96.59 |
| chr1  | 89512494  | 89512581  | chr1  | 88122074  | 88122161  | 88 | 88  | 0 | 0  | 81.82 |
| chr11 | 44099227  | 44099314  | chr9  | 44596915  | 44597002  | 88 | 88  | 0 | 0  | 96.59 |
| chr14 | 86325651  | 86325738  | chr15 | 86560887  | 86560974  | 88 | 88  | 0 | 0  | 88.64 |
| chr4  | 124689928 | 124690015 | chr3  | 141517088 | 141517175 | 88 | 88  | 0 | 0  | 88.64 |
| chr6  | 120771774 | 120771861 | chr5  | 123268975 | 123269062 | 88 | 88  | 0 | 0  | 96.59 |
| chr7  | 8757211   | 8757298   | chr6  | 9178195   | 9178282   | 88 | 88  | 0 | 0  | 87.5  |
| chr11 | 66263456  | 66263543  | chr9  | 67512683  | 67512768  | 88 | 86  | 0 | 0  | 95.35 |
| chr8  | 65411772  | 65411858  | chr7  | 67414353  | 67414439  | 87 | 87  | 0 | 0  | 97.7  |
| chr8  | 121488270 | 121488356 | chr7  | 124138043 | 124138129 | 87 | 87  | 0 | 0  | 100   |
| chr1  | 11642112  | 11642197  | chr1  | 11856119  | 11856204  | 86 | 86  | 0 | 0  | 86.05 |
| chr10 | 70890246  | 70890331  | chr8  | 72045445  | 72045530  | 86 | 86  | 0 | 0  | 88.37 |
| chr2  | 104212336 | 104212421 | chr12 | 107145328 | 107145413 | 86 | 86  | 0 | 0  | 93.02 |
| chr8  | 49190609  | 49190694  | chr7  | 50753338  | 50753423  | 86 | 86  | 0 | 0  | 95.35 |
| chr2  | 205309948 | 205310033 | chr13 | 95323076  | 95323160  | 86 | 85  | 0 | 0  | 97.65 |
| chr3  | 134331406 | 134331491 | chr2  | 136473010 | 136473094 | 86 | 85  | 0 | 0  | 97.65 |
| chr6  | 27756851  | 27756936  | chr5  | 28239810  | 28239862  | 86 | 53  | 0 | 84 | 92.45 |
| chr8  | 33960604  | 33960688  | chr7  | 35144690  | 35144778  | 85 | 89  | 0 | 0  | 96.47 |
| chr12 | 56543664  | 56543748  | chr10 | 57789073  | 57789157  | 85 | 85  | 0 | 0  | 88.24 |
| chr13 | 107708717 | 107708801 | chr14 | 91116757  | 91116841  | 85 | 85  | 0 | 0  | 89.41 |
| chr14 | 30056428  | 30056512  | chr15 | 29203848  | 29203932  | 85 | 85  | 0 | 0  | 97.65 |
| chr4  | 27044164  | 27044248  | chr3  | 27618893  | 27618977  | 85 | 85  | 0 | 0  | 96.47 |
| chr4  | 180711378 | 180711462 | chr3  | 198746826 | 198746910 | 85 | 85  | 0 | 0  | 89.41 |
| chr13 | 101588103 | 101588187 | chr14 | 84938798  | 84938880  | 85 | 83  | 0 | 0  | 97.59 |
| chr3  | 22738720  | 22738804  | chr2  | 23649058  | 23649140  | 85 | 83  | 0 | 0  | 86.75 |
| chr15 | 54303233  | 54303316  | chr16 | 54650726  | 54650810  | 84 | 85  | 0 | 0  | 98.81 |
| chr1  | 68441398  | 68441481  | chr1  | 67002182  | 67002265  | 84 | 84  | 0 | 0  | 95.06 |
| chr9  | 101721227 | 101721310 | chr11 | 85980515  | 85980598  | 84 | 84  | 0 | 0  | 96.43 |
| chrX  | 128574595 | 128574678 | chrX  | 132808936 | 132809019 | 84 | 84  | 0 | 25 | 88.1  |
| chrX  | 154463142 | 154463225 | chrX  | 159778832 | 159778915 | 84 | 84  | 0 | 0  | 100   |
| chr4  | 88657696  | 88657778  | chr3  | 104646603 | 104646688 | 83 | 86  | 0 | 0  | 93.98 |
| chr10 | 117877464 | 117877546 | chr8  | 120049634 | 120049716 | 83 | 83  | 0 | 0  | 100   |
| chr14 | 101991229 | 101991311 | chr15 | 102601191 | 102601273 | 83 | 83  | 0 | 0  | 85.19 |
| chr9  | 74671611  | 74671693  | chr11 | 58504362  | 58504444  | 83 | 83  | 0 | 0  | 98.8  |
| chr1  | 29450857  | 29450938  | chr1  | 30231625  | 30231707  | 82 | 83  | 0 | 0  | 86.59 |
| chr18 | 64219658  | 64219739  | chr17 | 61180664  | 61180745  | 82 | 82  | 0 | 0  | 92.68 |
| chr2  | 115513764 | 115513845 | chr13 | 1526007   | 15260088  | 82 | 82  | 0 | 1  | 93.9  |
| chr2  | 126864874 | 126864955 | chr13 | 12958861  | 12958942  | 82 | 82  | 0 | 0  | 100   |
| chr6  | 9854774   | 9854855   | chr5  | 10069236  | 10069317  | 82 | 82  | 0 | 0  | 97.56 |
| chr7  | 66347404  | 66347485  | chr6  | 68152402  | 68152483  | 82 | 82  | 0 | 81 | 96.34 |
| chr9  | 134879177 | 134879258 | chr11 | 119762623 | 119762704 | 82 | 82  | 0 | 0  | 86.59 |
| chr19 | 15740196  | 15740277  | chr20 | 16365422  | 16365502  | 82 | 81  | 0 | 0  | 86.42 |
| chr9  | 71697946  | 71698026  | chr11 | 55521045  | 55521130  | 81 | 86  | 0 | 0  | 98.77 |
| chr11 | 61362468  | 61362548  | chr9  | 62336942  | 62337022  | 81 | 81  | 0 | 0  | 88.89 |
| chr13 | 25958210  | 25958290  | chr14 | 25133241  | 25133321  | 81 | 81  | 0 | 0  | 92.59 |
| chr3  | 13030609  | 13030689  | chr2  | 13485456  | 13485536  | 81 | 81  | 0 | 0  | 96.3  |
| chr4  | 108792132 | 108792212 | chr3  | 125277174 | 125277254 | 81 | 81  | 0 | 0  | 83.95 |
| chrX  | 127666611 | 127666691 | chrX  | 131887721 | 131887801 | 81 | 81  | 0 | 0  | 93.83 |
| chr19 | 5599163   | 5599243   | chr20 | 5889121   | 5889199   | 81 | 79  | 0 | 0  | 84.81 |
| chr2  | 38546775  | 38546854  | chr12 | 40021720  | 40022108  | 80 | 389 | 0 | 0  | 87.18 |
| chr2  | 140015318 | 140015397 | chr13 | 29041393  | 29041472  | 80 | 80  | 0 | 1  | 96.25 |



|       |           |           |       |           |           |    |     |    |    |       |
|-------|-----------|-----------|-------|-----------|-----------|----|-----|----|----|-------|
| chr7  | 138057463 | 138057542 | chr6  | 140819032 | 140819111 | 80 | 80  | 0  | 0  | 91.25 |
| chr20 | 58799112  | 58799190  | chr21 | 61799521  | 61799601  | 79 | 81  | 0  | 0  | 89.87 |
| chr13 | 43030632  | 43030710  | chr14 | 42741732  | 42741811  | 79 | 80  | 0  | 0  | 85.71 |
| chr3  | 171970889 | 171970967 | chr2  | 175465211 | 175465290 | 79 | 80  | 0  | 0  | 88.61 |
| chr7  | 115305764 | 115305842 | chr6  | 117583458 | 117583537 | 79 | 80  | 0  | 0  | 89.74 |
| chr1  | 41681207  | 41681285  | chr1  | 42642758  | 42642836  | 79 | 79  | 0  | 0  | 74.68 |
| chr1  | 75982134  | 75982212  | chr1  | 74542773  | 74542851  | 79 | 79  | 0  | 7  | 92.41 |
| chr13 | 66222497  | 66222575  | chr14 | 48618702  | 48618780  | 79 | 79  | 0  | 0  | 96.2  |
| chr3  | 6009403   | 6009481   | chr2  | 6225406   | 6225484   | 79 | 79  | 0  | 0  | 87.34 |
| chr6  | 126137903 | 126137981 | chr5  | 128654225 | 128654303 | 79 | 79  | 0  | 0  | 100   |
| chr7  | 114585777 | 114585855 | chr6  | 116666470 | 116666548 | 79 | 79  | 0  | 0  | 96.2  |
| chrX  | 120970353 | 120970431 | chrX  | 125060966 | 125061044 | 79 | 79  | 0  | 0  | 96.2  |
| chr19 | 57460015  | 57460092  | chr20 | 54865563  | 54865981  | 78 | 419 | 0  | 0  | 79.49 |
| chr11 | 6692464   | 6692541   | chr9  | 6872812   | 6872891   | 78 | 80  | 0  | 0  | 88.46 |
| chrX  | 17576233  | 17576310  | chrX  | 18170039  | 18170116  | 78 | 78  | 0  | 0  | 89.74 |
| chr3  | 12698978  | 12699055  | chr2  | 13153577  | 13153653  | 78 | 77  | 0  | 10 | 94.67 |
| chr4  | 41705915  | 41705992  | chr3  | 44392757  | 44392833  | 78 | 77  | 0  | 81 | 90.91 |
| chr19 | 39931547  | 39931624  | chr20 | 36279033  | 36279097  | 78 | 65  | 0  | 0  | 90.77 |
| chr1  | 20836415  | 20836492  | chr1  | 21158235  | 21158290  | 78 | 56  | 0  | 0  | 91.07 |
| chr20 | 58799191  | 58799267  | chr21 | 61799520  | 61799600  | 77 | 81  | 0  | 0  | 89.61 |
| chr13 | 30597986  | 30598062  | chr14 | 29804972  | 29805048  | 77 | 77  | 0  | 0  | 94.81 |
| chr19 | 15754280  | 15754356  | chr20 | 16350130  | 16350206  | 77 | 77  | 0  | 0  | 92.21 |
| chr22 | 45302921  | 45302997  | chr23 | 45624523  | 45624599  | 77 | 77  | 0  | 0  | 98.7  |
| chr4  | 69973706  | 69973782  | chr3  | 76912821  | 76912897  | 77 | 77  | 0  | 72 | 98.7  |
| chrX  | 101980077 | 101980153 | chrX  | 105492286 | 105492361 | 77 | 76  | 0  | 0  | 77.63 |
| chr21 | 45192831  | 45192906  | chr22 | 45367418  | 45367494  | 76 | 77  | 0  | 0  | 92.11 |
| chr13 | 99495213  | 99495288  | chr14 | 82824593  | 82824668  | 76 | 76  | 0  | 0  | 89.47 |
| chr2  | 198139356 | 198139431 | chr13 | 88196475  | 88196550  | 76 | 76  | 0  | 0  | 96.05 |
| chr4  | 43625598  | 43625673  | chr3  | 46321694  | 46321769  | 76 | 76  | 0  | 0  | 93.42 |
| chr4  | 115975470 | 115975545 | chr3  | 132653277 | 132653352 | 76 | 76  | 0  | 0  | 97.37 |
| chr5  | 124980636 | 124980711 | chr4  | 131299674 | 131299749 | 76 | 76  | 0  | 2  | 96.05 |
| chr8  | 56267249  | 56267324  | chr7  | 57960848  | 57960923  | 76 | 76  | 0  | 0  | 100   |
| chr9  | 130860404 | 130860479 | chr11 | 115738461 | 115738536 | 76 | 76  | 0  | 0  | 100   |
| chrX  | 36029055  | 36029130  | chrX  | 37387628  | 37387703  | 76 | 76  | 0  | 0  | 93.42 |
| chr19 | 48565008  | 48565082  | chr20 | 45469432  | 45469507  | 75 | 76  | 10 | 10 | 96    |
| chr1  | 214403471 | 214403545 | chr1  | 198139012 | 198139086 | 75 | 75  | 0  | 0  | 92    |
| chr11 | 59044170  | 59044244  | chr9  | 59943991  | 59944065  | 75 | 75  | 0  | 4  | 97.33 |
| chr7  | 93869469  | 93869543  | chr6  | 95471090  | 95471164  | 75 | 75  | 0  | 0  | 93.33 |
| chr7  | 145852249 | 145852323 | chr6  | 148692891 | 148692965 | 75 | 75  | 0  | 2  | 92    |
| chr6  | 62835328  | 62835402  | chr5  | 63542800  | 63542872  | 75 | 73  | 0  | 0  | 94.52 |
| chr12 | 130530820 | 130530894 | chr10 | 133698826 | 133698896 | 75 | 71  | 0  | 4  | 95.77 |
| chr2  | 117287372 | 117287446 | chr13 | 3344043   | 3344113   | 75 | 71  | 0  | 10 | 90.14 |
| chr2  | 47311482  | 47311555  | chr12 | 49345033  | 49345108  | 74 | 76  | 0  | 0  | 93.24 |
| chr11 | 64145575  | 64145648  | chr9  | 65363216  | 65363289  | 74 | 74  | 0  | 0  | 95.95 |
| chr11 | 123685738 | 123685811 | chr9  | 125711479 | 125711552 | 74 | 74  | 0  | 0  | 95.95 |
| chr4  | 98430472  | 98430545  | chr3  | 114760261 | 114760334 | 74 | 74  | 0  | 0  | 98.65 |
| chr16 | 73499157  | 73499229  | chr18 | 67825152  | 67825549  | 73 | 398 | 0  | 76 | 90.14 |
| chr20 | 45551054  | 45551126  | chr21 | 48098763  | 48098836  | 73 | 74  | 0  | 79 | 91.78 |
| chr4  | 115813691 | 115813763 | chr3  | 132491598 | 132491671 | 73 | 74  | 0  | 0  | 86.3  |
| chr1  | 155202828 | 155202900 | chr1  | 137291160 | 137291232 | 73 | 73  | 0  | 0  | 83.56 |
| chr1  | 236078689 | 236078761 | chr1  | 220050481 | 220050553 | 73 | 73  | 0  | 0  | 91.78 |
| chr13 | 69361686  | 69361758  | chr14 | 51793638  | 51793710  | 73 | 73  | 0  | 0  | 94.52 |
| chrX  | 21569211  | 21569283  | chrX  | 22329553  | 22329625  | 73 | 73  | 0  | 0  | 94.52 |

|       |           |           |       |           |           |    |    |   |    |       |
|-------|-----------|-----------|-------|-----------|-----------|----|----|---|----|-------|
| chr6  | 79194809  | 79194881  | chr5  | 80679324  | 80679395  | 73 | 72 | 0 | 0  | 91.67 |
| chr1  | 33520374  | 33520445  | chr1  | 34255992  | 34256063  | 72 | 72 | 0 | 0  | 95.83 |
| chr1  | 65675422  | 65675493  | chr1  | 64014742  | 64014813  | 72 | 72 | 0 | 40 | 90.28 |
| chr1  | 211771621 | 211771692 | chr1  | 195484160 | 195484231 | 72 | 72 | 0 | 0  | 100   |
| chr11 | 39573385  | 39573456  | chr9  | 40043116  | 40043187  | 72 | 72 | 0 | 0  | 100   |
| chr14 | 43556494  | 43556565  | chr15 | 42760272  | 42760343  | 72 | 72 | 0 | 0  | 94.44 |
| chr17 | 60917571  | 60917642  | chr19 | 64174055  | 64174126  | 72 | 72 | 0 | 0  | 90.28 |
| chr20 | 17404058  | 17404129  | chr21 | 17253555  | 17253626  | 72 | 72 | 0 | 0  | 90.28 |
| chr3  | 186554891 | 186554962 | chr2  | 190561327 | 190561398 | 72 | 72 | 0 | 0  | 95.83 |
| chr4  | 104086808 | 104086879 | chr3  | 120489010 | 120489081 | 72 | 72 | 0 | 0  | 100   |
| chr7  | 92912551  | 92912622  | chr6  | 94494105  | 94494173  | 72 | 69 | 0 | 0  | 95.65 |
| chr2  | 36865952  | 36866022  | chr12 | 38321000  | 38321072  | 71 | 73 | 0 | 0  | 91.55 |
| chr17 | 78590276  | 78590346  | chr19 | 82401414  | 82401484  | 71 | 71 | 0 | 0  | 91.55 |
| chr18 | 60799148  | 60799218  | chr17 | 57660612  | 57660682  | 71 | 71 | 0 | 0  | 90.14 |
| chrX  | 124079820 | 124079890 | chrX  | 128206001 | 128206070 | 71 | 70 | 0 | 2  | 94.29 |
| chr1  | 223026799 | 223026868 | chr1  | 206846493 | 206846562 | 70 | 70 | 0 | 1  | 100   |
| chr20 | 55731093  | 55731162  | chr21 | 58660684  | 58660753  | 70 | 70 | 0 | 0  | 98.57 |
| chr11 | 81889188  | 81889256  | chr9  | 83270760  | 83270828  | 69 | 69 | 0 | 0  | 95.65 |
| chr15 | 60147850  | 60147918  | chr16 | 60682332  | 60682400  | 69 | 69 | 0 | 0  | 95.65 |
| chr9  | 120884452 | 120884520 | chr11 | 105623327 | 105623395 | 69 | 69 | 0 | 0  | 98.55 |
| chrX  | 130914303 | 130914371 | chrX  | 135336183 | 135336236 | 69 | 54 | 0 | 0  | 83.33 |
| chr14 | 84326376  | 84326444  | chr15 | 84452444  | 84452489  | 69 | 46 | 0 | 77 | 93.18 |
| chr18 | 56007044  | 56007111  | chr17 | 52887883  | 52887953  | 68 | 71 | 0 | 0  | 91.18 |
| chr2  | 208168752 | 208168819 | chr13 | 98215969  | 98216036  | 68 | 68 | 0 | 0  | 98.53 |
| chr6  | 28193108  | 28193175  | chr5  | 28649103  | 28649170  | 68 | 68 | 0 | 74 | 94.12 |
| chr8  | 67240770  | 67240837  | chr7  | 69247946  | 69248013  | 68 | 68 | 0 | 0  | 91.18 |
| chr1  | 101529434 | 101529500 | chr1  | 100578437 | 100578503 | 67 | 67 | 0 | 0  | 98.51 |
| chr2  | 11190702  | 11190768  | chr12 | 11910740  | 11910806  | 67 | 67 | 0 | 0  | 89.55 |
| chr2  | 41572394  | 41572460  | chr12 | 43138351  | 43138417  | 67 | 67 | 0 | 0  | 98.51 |
| chr4  | 176196416 | 176196482 | chr3  | 194175083 | 194175149 | 67 | 67 | 0 | 51 | 85.07 |
| chr7  | 29414352  | 29414418  | chr6  | 30565276  | 30565342  | 67 | 67 | 0 | 0  | 92.54 |
| chr7  | 75478985  | 75479051  | chr6  | 76578106  | 76578172  | 67 | 67 | 0 | 0  | 95.52 |
| chr8  | 85564579  | 85564645  | chr7  | 87701993  | 87702059  | 67 | 67 | 0 | 0  | 86.57 |
| chr8  | 114444449 | 114444515 | chr7  | 116966718 | 116966784 | 67 | 67 | 0 | 0  | 98.51 |
| chr9  | 12113082  | 12113148  | chr11 | 12308323  | 12308389  | 67 | 67 | 0 | 0  | 98.51 |
| chr12 | 43824241  | 43824307  | chr10 | 44439993  | 44440058  | 67 | 66 | 0 | 0  | 93.75 |
| chr20 | 53312152  | 53312218  | chr21 | 56172476  | 56172535  | 67 | 60 | 0 | 0  | 98.33 |
| chr2  | 228305142 | 228305207 | chr13 | 118904374 | 118904454 | 66 | 81 | 0 | 0  | 93.85 |
| chr1  | 163716003 | 163716068 | chr1  | 145955090 | 145955155 | 66 | 66 | 0 | 0  | 89.39 |
| chr6  | 28381042  | 28381107  | chr5  | 28849749  | 28849814  | 66 | 66 | 0 | 0  | 100   |
| chr7  | 93450729  | 93450794  | chr6  | 95047744  | 95047809  | 66 | 66 | 0 | 0  | 98.48 |
| chr11 | 115507899 | 115507963 | chr9  | 117504179 | 117504243 | 65 | 65 | 0 | 0  | 92.31 |
| chr12 | 73025931  | 73025995  | chr10 | 74751119  | 74751183  | 65 | 65 | 0 | 0  | 95.38 |
| chr17 | 19426865  | 19426929  | chr19 | 19762093  | 19762157  | 65 | 65 | 0 | 0  | 96.92 |
| chr4  | 259899    | 259963    | chr3  | 248928    | 248992    | 65 | 65 | 0 | 0  | 96.92 |
| chr11 | 131430121 | 131430184 | chr9  | 133580180 | 133580243 | 64 | 64 | 0 | 0  | 95.31 |
| chr14 | 85009024  | 85009087  | chr15 | 85167974  | 85168037  | 64 | 64 | 0 | 0  | 100   |
| chr15 | 87841670  | 87841733  | chr16 | 88714979  | 88715042  | 64 | 64 | 0 | 0  | 98.44 |
| chrX  | 98523052  | 98523115  | chrX  | 101766559 | 101766622 | 64 | 64 | 0 | 0  | 96.88 |
| chr1  | 193671246 | 193671309 | chr1  | 176313829 | 176313891 | 64 | 63 | 0 | 0  | 98.41 |
| chr1  | 3299125   | 3299187   | chr1  | 3151333   | 3151396   | 63 | 64 | 0 | 0  | 100   |
| chr1  | 154700655 | 154700717 | chr1  | 136712341 | 136712403 | 63 | 63 | 0 | 0  | 95.24 |
| chr18 | 50757719  | 50757781  | chr17 | 47384412  | 47384474  | 63 | 63 | 0 | 41 | 84.13 |

|       |           |           |       |           |           |    |    |   |    |       |
|-------|-----------|-----------|-------|-----------|-----------|----|----|---|----|-------|
| chr4  | 8661058   | 8661120   | chr3  | 8739127   | 8739189   | 63 | 63 | 0 | 0  | 96.83 |
| chr4  | 172344414 | 172344476 | chr3  | 190189192 | 190189254 | 63 | 63 | 0 | 0  | 98.41 |
| chr8  | 3933658   | 3933720   | chr7  | 4107814   | 4107876   | 63 | 63 | 0 | 0  | 92.06 |
| chr18 | 23616631  | 23616692  | chr17 | 19550425  | 19550487  | 62 | 63 | 0 | 0  | 90.32 |
| chr1  | 81018908  | 81018969  | chr1  | 79629963  | 79630024  | 62 | 62 | 0 | 0  | 96.77 |
| chr18 | 44649627  | 44649688  | chr17 | 41153902  | 41153963  | 62 | 62 | 0 | 0  | 88.71 |
| chr5  | 137088186 | 137088247 | chr4  | 143688181 | 143688242 | 62 | 62 | 0 | 0  | 95.16 |
| chr1  | 99798344  | 99798404  | chr1  | 98846324  | 98846384  | 61 | 61 | 0 | 0  | 91.8  |
| chr13 | 67393137  | 67393197  | chr14 | 49800203  | 49800263  | 61 | 61 | 0 | 0  | 93.44 |
| chr22 | 34517535  | 34517595  | chr23 | 34644345  | 34644405  | 61 | 61 | 0 | 0  | 100   |
| chr3  | 9084573   | 9084633   | chr2  | 9453601   | 9453661   | 61 | 61 | 0 | 0  | 86.89 |
| chr3  | 46118052  | 46118112  | chr2  | 47468855  | 47468915  | 61 | 61 | 0 | 0  | 96.72 |
| chr3  | 129357522 | 129357582 | chr2  | 131249275 | 131249335 | 61 | 61 | 0 | 0  | 98.36 |
| chr6  | 30252358  | 30252418  | chr5  | 30631208  | 30631268  | 61 | 61 | 0 | 1  | 98.36 |
| chr5  | 161224319 | 161224379 | chr4  | 168405616 | 168405675 | 61 | 60 | 0 | 11 | 93.33 |
| chr1  | 209091889 | 209091948 | chr1  | 192731199 | 192731258 | 60 | 60 | 0 | 25 | 88.33 |
| chr11 | 1608026   | 1608085   | chr9  | 1742595   | 1742654   | 60 | 60 | 0 | 0  | 95    |
| chr12 | 128374582 | 128374641 | chr10 | 131504736 | 131504795 | 60 | 60 | 0 | 0  | 85    |
| chr18 | 47349635  | 47349694  | chr17 | 43943742  | 43943801  | 60 | 60 | 0 | 0  | 89.47 |
| chr2  | 67073405  | 67073464  | chr12 | 69315798  | 69315857  | 60 | 60 | 0 | 0  | 98.33 |
| chr2  | 143223140 | 143223199 | chr13 | 32258754  | 32258813  | 60 | 60 | 0 | 0  | 100   |
| chr4  | 177242033 | 177242092 | chr3  | 195205651 | 195205710 | 60 | 60 | 0 | 0  | 88.33 |
| chr6  | 109447381 | 109447440 | chr5  | 111756127 | 111756186 | 60 | 60 | 0 | 0  | 90    |
| chr9  | 106118694 | 106118753 | chr11 | 90572383  | 90572442  | 60 | 60 | 0 | 0  | 91.67 |
| chrX  | 17310519  | 17310578  | chrX  | 17894024  | 17894083  | 60 | 60 | 0 | 0  | 100   |
| chr10 | 627318    | 627377    | chr8  | 685061    | 685118    | 60 | 58 | 0 | 77 | 81.03 |
| chr4  | 121222332 | 121222391 | chr3  | 137911722 | 137911773 | 60 | 52 | 0 | 35 | 76.92 |
| chr12 | 54815524  | 54815582  | chr10 | 56063214  | 56063272  | 59 | 59 | 0 | 0  | 94.92 |
| chr14 | 65067379  | 65067437  | chr15 | 64673654  | 64673712  | 59 | 59 | 0 | 0  | 96.61 |
| chr2  | 145463788 | 145463846 | chr13 | 34499319  | 34499377  | 59 | 59 | 0 | 0  | 93.22 |
| chr6  | 18823744  | 18823802  | chr5  | 19196940  | 19196998  | 59 | 59 | 0 | 0  | 98.31 |
| chr8  | 35131019  | 35131077  | chr7  | 36332161  | 36332219  | 59 | 59 | 0 | 0  | 100   |
| chrX  | 41578014  | 41578072  | chrX  | 42923271  | 42923329  | 59 | 59 | 0 | 0  | 86.44 |
| chrX  | 133890969 | 133891027 | chrX  | 138527804 | 138527862 | 59 | 59 | 0 | 3  | 86.44 |
| chrX  | 98522851  | 98522909  | chrX  | 101770764 | 101770813 | 59 | 50 | 0 | 0  | 92    |
| chr7  | 62877729  | 62877786  | chr6  | 64496295  | 64496355  | 58 | 61 | 0 | 0  | 79.31 |
| chrX  | 112017440 | 112017497 | chrX  | 115680659 | 115680719 | 58 | 61 | 0 | 0  | 87.93 |
| chr20 | 61945584  | 61945641  | chr21 | 65009860  | 65009918  | 58 | 59 | 0 | 0  | 86.21 |
| chr14 | 85638372  | 85638429  | chr15 | 85808713  | 85808770  | 58 | 58 | 0 | 0  | 96.55 |
| chr19 | 58470173  | 58470230  | chr20 | 55924032  | 55924089  | 58 | 58 | 0 | 0  | 82.76 |
| chr2  | 13744538  | 13744595  | chr12 | 14512866  | 14512923  | 58 | 58 | 0 | 0  | 100   |
| chr2  | 182108367 | 182108424 | chr13 | 71860394  | 71860451  | 58 | 58 | 0 | 0  | 89.66 |
| chr9  | 71479785  | 71479842  | chr11 | 55297566  | 55297623  | 58 | 58 | 0 | 57 | 82.76 |
| chrX  | 3302803   | 3302860   | chrX  | 3066965   | 3067022   | 58 | 58 | 0 | 71 | 86.21 |
| chr10 | 124665156 | 124665213 | chr8  | 126903556 | 126903607 | 58 | 52 | 0 | 0  | 86.27 |
| chr10 | 44262415  | 44262471  | chr8  | 44986556  | 44986615  | 57 | 60 | 0 | 0  | 100   |
| chr10 | 34729793  | 34729849  | chr8  | 35155381  | 35155437  | 57 | 57 | 0 | 0  | 96.49 |
| chr14 | 28696851  | 28696907  | chr15 | 27647637  | 27647693  | 57 | 57 | 0 | 0  | 94.74 |
| chr19 | 39875758  | 39875814  | chr20 | 36445665  | 36445721  | 57 | 57 | 0 | 0  | 94.74 |
| chr6  | 170055777 | 170055833 | chr5  | 174543050 | 174543106 | 57 | 57 | 0 | 0  | 85.96 |
| chr2  | 99187855  | 99187911  | chr12 | 101995279 | 101995334 | 57 | 56 | 0 | 0  | 100   |
| chr18 | 63800683  | 63800738  | chr17 | 60746817  | 60746872  | 56 | 56 | 0 | 0  | 98.21 |
| chr2  | 134276263 | 134276318 | chr13 | 23279992  | 23280047  | 56 | 56 | 0 | 0  | 91.07 |

|       |           |           |       |           |           |    |    |   |    |       |
|-------|-----------|-----------|-------|-----------|-----------|----|----|---|----|-------|
| chr3  | 42897343  | 42897398  | chr2  | 44099429  | 44099484  | 56 | 56 | 0 | 0  | 87.5  |
| chrX  | 92681323  | 92681378  | chrX  | 95576635  | 95576690  | 56 | 56 | 0 | 49 | 92.86 |
| chr1  | 234872015 | 234872069 | chr1  | 218760208 | 218760266 | 55 | 59 | 0 | 0  | 96.36 |
| chr9  | 36245057  | 36245111  | chr11 | 36857781  | 36857836  | 55 | 56 | 0 | 0  | 98.18 |
| chr13 | 69198486  | 69198540  | chr14 | 51617592  | 51617646  | 55 | 55 | 0 | 0  | 96.36 |
| chr13 | 86767394  | 86767448  | chr14 | 69511965  | 69512019  | 55 | 55 | 0 | 0  | 98.18 |
| chr4  | 7729208   | 7729262   | chr3  | 7804002   | 7804056   | 55 | 55 | 0 | 0  | 100   |
| chr7  | 73391752  | 73391806  | chr6  | 75138051  | 75138105  | 55 | 55 | 0 | 0  | 87.27 |
| chr5  | 670715    | 670768    | chr4  | 777453    | 777507    | 54 | 55 | 0 | 0  | 96.3  |
| chr2  | 64721050  | 64721103  | chr12 | 66953510  | 66953563  | 54 | 54 | 0 | 0  | 100   |
| chr20 | 9027150   | 9027203   | chr21 | 8917109   | 8917162   | 54 | 54 | 0 | 0  | 90.74 |
| chr21 | 44929053  | 44929106  | chr22 | 45076248  | 45076301  | 54 | 54 | 0 | 0  | 96.3  |
| chr4  | 13685569  | 13685622  | chr3  | 13917427  | 13917480  | 54 | 54 | 0 | 0  | 83.33 |
| chr4  | 108792078 | 108792131 | chr3  | 125277174 | 125277227 | 54 | 54 | 0 | 0  | 85.19 |
| chr4  | 188325852 | 188325905 | chr3  | 206538782 | 206538835 | 54 | 54 | 0 | 0  | 96.3  |
| chr5  | 600112    | 600165    | chr4  | 707258    | 707311    | 54 | 54 | 0 | 0  | 100   |
| chr7  | 154413197 | 154413250 | chr6  | 157256061 | 157256114 | 54 | 54 | 0 | 0  | 92.59 |
| chrX  | 68270243  | 68270296  | chrX  | 70307900  | 70307953  | 54 | 54 | 0 | 0  | 88.89 |
| chr1  | 150223787 | 150223839 | chr1  | 132180518 | 132180570 | 53 | 53 | 0 | 0  | 69.81 |
| chr1  | 183502497 | 183502549 | chr1  | 166086183 | 166086235 | 53 | 53 | 0 | 0  | 94    |
| chr21 | 45473858  | 45473910  | chr22 | 45655531  | 45655583  | 53 | 53 | 0 | 0  | 100   |
| chr4  | 69999340  | 69999392  | chr3  | 76887328  | 76887380  | 53 | 53 | 0 | 0  | 100   |
| chr6  | 165915178 | 165915230 | chr5  | 170230184 | 170230236 | 53 | 53 | 0 | 0  | 98.11 |
| chr16 | 6846032   | 6846083   | chr18 | 6963805   | 6963856   | 52 | 52 | 0 | 0  | 90.38 |
| chrX  | 99268013  | 99268064  | chrX  | 102513960 | 102514011 | 52 | 52 | 0 | 0  | 92.31 |
| chr3  | 112768688 | 112768739 | chr2  | 114356782 | 114356830 | 52 | 49 | 0 | 5  | 91.84 |
| chr1  | 185323746 | 185323796 | chr1  | 167898120 | 167898170 | 51 | 51 | 0 | 0  | 100   |
| chr10 | 11939804  | 11939854  | chr8  | 12079784  | 12079834  | 51 | 51 | 0 | 0  | 98.04 |
| chr3  | 155280656 | 155280706 | chr2  | 158409840 | 158409890 | 51 | 51 | 0 | 0  | 96.08 |
| chr6  | 154033174 | 154033224 | chr5  | 157559629 | 157559679 | 51 | 51 | 0 | 0  | 96.08 |
| chr7  | 87257858  | 87257908  | chr6  | 88774607  | 88774657  | 51 | 51 | 0 | 0  | 98.04 |
| chr9  | 125355797 | 125355847 | chr11 | 110158028 | 110158078 | 51 | 51 | 0 | 0  | 92.16 |
| chr9  | 127025568 | 127025618 | chr11 | 111836220 | 111836270 | 51 | 51 | 0 | 0  | 94.12 |
| chr6  | 51978613  | 51978663  | chr5  | 53737377  | 53737426  | 51 | 50 | 0 | 0  | 98    |
| chr11 | 109215304 | 109215353 | chr9  | 111172648 | 111172697 | 50 | 50 | 0 | 0  | 98    |
| chr17 | 4332901   | 4332950   | chr19 | 4641603   | 4641652   | 50 | 50 | 0 | 0  | 90    |
| chr4  | 12759227  | 12759276  | chr3  | 12969712  | 12969761  | 50 | 50 | 0 | 38 | 98    |
| chr4  | 69978997  | 69979046  | chr3  | 76907557  | 76907606  | 50 | 50 | 0 | 0  | 100   |
| chr9  | 126312707 | 126312756 | chr11 | 111119352 | 111119401 | 50 | 50 | 0 | 10 | 86    |
| chrX  | 81134242  | 81134291  | chrX  | 83676980  | 83677029  | 50 | 50 | 0 | 0  | 96    |
| chrX  | 70743479  | 70743528  | chrX  | 73010848  | 73010895  | 50 | 48 | 0 | 89 | 95.83 |
| chr19 | 56684189  | 56684237  | chr20 | 54111127  | 54111175  | 49 | 49 | 0 | 0  | 100   |
| chr21 | 44993921  | 44993969  | chr22 | 45172449  | 45172497  | 49 | 49 | 0 | 0  | 83.67 |
| chr3  | 45884442  | 45884490  | chr2  | 47231954  | 47232002  | 49 | 49 | 0 | 0  | 97.96 |
| chr3  | 52200544  | 52200592  | chr2  | 53813474  | 53813522  | 49 | 49 | 0 | 0  | 91.84 |
| chr8  | 29961251  | 29961299  | chr7  | 31355140  | 31355188  | 49 | 49 | 0 | 0  | 91.84 |
| chr1  | 243618194 | 243618241 | chr1  | 227742369 | 227742416 | 48 | 48 | 0 | 0  | 93.75 |
| chr2  | 65508441  | 65508488  | chr12 | 67748286  | 67748333  | 48 | 48 | 0 | 0  | 100   |
| chr20 | 48154620  | 48154667  | chr21 | 50773544  | 50773591  | 48 | 48 | 0 | 2  | 87.5  |
| chr21 | 42468811  | 42468858  | chr22 | 42590037  | 42590084  | 48 | 48 | 0 | 0  | 97.92 |
| chr1  | 55023793  | 55023840  | chr1  | 53308717  | 53308762  | 48 | 46 | 0 | 0  | 86.96 |
| chr13 | 106212898 | 106212944 | chr14 | 89617274  | 89617320  | 47 | 47 | 0 | 0  | 97.87 |
| chr16 | 83939177  | 83939223  | chr18 | 78861948  | 78861994  | 47 | 47 | 0 | 0  | 93.62 |

|       |           |           |       |           |           |    |    |   |    |       |
|-------|-----------|-----------|-------|-----------|-----------|----|----|---|----|-------|
| chr2  | 22690471  | 22690517  | chr12 | 23568702  | 23568748  | 47 | 47 | 0 | 0  | 93.62 |
| chr15 | 43029150  | 43029195  | chr16 | 42955493  | 42955538  | 46 | 46 | 0 | 60 | 97.83 |
| chr4  | 132232041 | 132232086 | chr3  | 149202936 | 149202981 | 46 | 46 | 0 | 0  | 86.96 |
| chr9  | 110243521 | 110243564 | chr11 | 94770731  | 94770775  | 44 | 45 | 0 | 0  | 95.12 |
| chr1  | 222318412 | 222318455 | chr1  | 206133189 | 206133232 | 44 | 44 | 0 | 0  | 79.55 |
| chr18 | 42034867  | 42034910  | chr17 | 38372288  | 38372331  | 44 | 44 | 0 | 0  | 95.45 |
| chr9  | 15711610  | 15711653  | chr11 | 15950048  | 15950091  | 44 | 44 | 0 | 0  | 100   |
| chr13 | 93653393  | 93653436  | chr14 | 76681152  | 76681193  | 44 | 42 | 0 | 0  | 100   |
| chr10 | 52400939  | 52400981  | chr8  | 53280558  | 53280600  | 43 | 43 | 0 | 0  | 95.35 |
| chr11 | 82645498  | 82645540  | chr9  | 84063837  | 84063879  | 43 | 43 | 0 | 26 | 93.02 |
| chr16 | 17773600  | 17773642  | chr18 | 18152851  | 18152893  | 43 | 43 | 0 | 80 | 86.05 |
| chr16 | 73978422  | 73978464  | chr18 | 68376071  | 68376113  | 43 | 43 | 0 | 0  | 90.7  |
| chr5  | 1199482   | 1199524   | chr4  | 1240525   | 1240567   | 43 | 43 | 0 | 0  | 86.05 |
| chr5  | 178296692 | 178296734 | chr4  | 185805610 | 185805652 | 43 | 43 | 0 | 0  | 93.02 |
| chrX  | 118887526 | 118887568 | chrX  | 122959331 | 122959373 | 43 | 43 | 0 | 19 | 90.7  |
| chr8  | 115520605 | 115520647 | chr7  | 118086697 | 118086736 | 43 | 40 | 0 | 0  | 82.5  |
| chr16 | 31519351  | 31519392  | chr18 | 32563777  | 32563822  | 42 | 46 | 0 | 0  | 95.24 |
| chr18 | 43567831  | 43567872  | chr17 | 39935737  | 39935779  | 42 | 43 | 0 | 0  | 95.24 |
| chr10 | 55905670  | 55905711  | chr8  | 56829472  | 56829513  | 42 | 42 | 0 | 0  | 100   |
| chr11 | 55777214  | 55777255  | chr9  | 56610633  | 56610674  | 42 | 42 | 0 | 0  | 85.71 |
| chr15 | 49488502  | 49488543  | chr16 | 49518568  | 49518609  | 42 | 42 | 0 | 0  | 100   |
| chr18 | 23414717  | 23414758  | chr17 | 19347177  | 19347218  | 42 | 42 | 0 | 0  | 95.24 |
| chr2  | 108336113 | 108336154 | chr12 | 116087478 | 116087519 | 42 | 42 | 0 | 0  | 100   |
| chr22 | 46121653  | 46121694  | chr23 | 46461818  | 46461859  | 42 | 42 | 0 | 0  | 83.33 |
| chr3  | 14616294  | 14616335  | chr2  | 15214780  | 15214821  | 42 | 42 | 0 | 0  | 95.24 |
| chr1  | 218037054 | 218037095 | chr1  | 201783733 | 201783772 | 42 | 40 | 0 | 0  | 100   |
| chr18 | 19517242  | 19517282  | chr17 | 15420020  | 15420063  | 41 | 44 | 0 | 0  | 92.68 |
| chr10 | 127121600 | 127121640 | chr8  | 129640287 | 129640327 | 41 | 41 | 0 | 0  | 87.8  |
| chr11 | 1608327   | 1608367   | chr9  | 1742286   | 1742326   | 41 | 41 | 0 | 0  | 97.56 |
| chr12 | 2659823   | 2659863   | chr10 | 2733814   | 2733854   | 41 | 41 | 0 | 0  | 97.56 |
| chr15 | 79464966  | 79465006  | chr16 | 80131172  | 80131212  | 41 | 41 | 0 | 0  | 92.68 |
| chr3  | 51823259  | 51823299  | chr2  | 53394779  | 53394819  | 41 | 41 | 0 | 0  | 95.12 |
| chr4  | 65134679  | 65134719  | chr3  | 81507154  | 81507194  | 41 | 41 | 0 | 0  | 95.12 |
| chr4  | 69978953  | 69978993  | chr3  | 76907610  | 76907650  | 41 | 41 | 0 | 0  | 97.56 |
| chr4  | 70142789  | 70142829  | chr3  | 76743611  | 76743651  | 41 | 41 | 0 | 0  | 100   |
| chr7  | 110956974 | 110957014 | chr6  | 112902596 | 112902636 | 41 | 41 | 0 | 0  | 95.12 |
| chrX  | 35624285  | 35624325  | chrX  | 36918744  | 36918784  | 41 | 41 | 0 | 0  | 82.93 |
| chr1  | 200332386 | 200332425 | chr1  | 183263966 | 183264005 | 40 | 40 | 0 | 0  | 100   |
| chr14 | 101992996 | 101993035 | chr15 | 102599762 | 102599801 | 40 | 40 | 0 | 0  | 87.5  |
| chr2  | 145623669 | 145623708 | chr13 | 34666496  | 34666535  | 40 | 40 | 0 | 0  | 85    |
| chr20 | 58799072  | 58799111  | chr21 | 61799520  | 61799559  | 40 | 40 | 0 | 0  | 92.5  |
| chr21 | 39863474  | 39863513  | chr22 | 39906631  | 39906670  | 40 | 40 | 0 | 10 | 85    |
| chr4  | 138735757 | 138735796 | chr3  | 155913815 | 155913854 | 40 | 40 | 0 | 0  | 100   |
| chr4  | 166315998 | 166316037 | chr3  | 183669012 | 183669051 | 40 | 40 | 0 | 0  | 82.5  |
| chr1  | 5721084   | 5721122   | chr1  | 5600089   | 5600127   | 39 | 39 | 0 | 0  | 92.31 |
| chr14 | 68184893  | 68184931  | chr15 | 67839877  | 67839915  | 39 | 39 | 0 | 0  | 92.31 |

|       |           |           |       |           |           |    |  |    |   |    |       |
|-------|-----------|-----------|-------|-----------|-----------|----|--|----|---|----|-------|
| chr2  | 208168820 | 208168858 | chr13 | 98218727  | 98218765  | 39 |  | 39 | 0 | 0  | 92.31 |
| chr20 | 22483634  | 22483672  | chr21 | 22429981  | 22430019  | 39 |  | 39 | 0 | 0  | 97.44 |
| chr3  | 145968017 | 145968055 | chr2  | 148669227 | 148669265 | 39 |  | 39 | 0 | 0  | 94.74 |
| chr3  | 84393833  | 84393870  | chr2  | 86672660  | 86672698  | 38 |  | 39 | 0 | 0  | 97.37 |
| chr6  | 34122592  | 34122629  | chr5  | 34570304  | 34570341  | 38 |  | 38 | 0 | 0  | 92.11 |
| chr6  | 70815513  | 70815550  | chr5  | 71950260  | 71950297  | 38 |  | 38 | 0 | 0  | 89.47 |
| chr10 | 123400581 | 123400617 | chr8  | 125724973 | 125725009 | 37 |  | 37 | 0 | 0  | 86.49 |
| chr20 | 32771138  | 32771174  | chr21 | 34777498  | 34777534  | 37 |  | 37 | 0 | 0  | 100   |
| chr7  | 112030119 | 112030155 | chr6  | 114045610 | 114045646 | 37 |  | 37 | 0 | 0  | 100   |
| chr11 | 2485811   | 2485846   | chr9  | 2669346   | 2669381   | 36 |  | 36 | 0 | 0  | 100   |
| chr21 | 45473817  | 45473852  | chr22 | 45655589  | 45655624  | 36 |  | 36 | 0 | 0  | 97.22 |
| chrX  | 111092795 | 111092830 | chrX  | 114829964 | 114829999 | 36 |  | 36 | 0 | 0  | 100   |
| chr5  | 4994052   | 4994086   | chr4  | 5101968   | 5102002   | 35 |  | 35 | 0 | 0  | 91.43 |
| chr4  | 4589540   | 4589573   | chr3  | 4597804   | 4597837   | 34 |  | 34 | 0 | 0  | 85.29 |
| chr6  | 126174671 | 126174704 | chr5  | 128693465 | 128693498 | 34 |  | 34 | 0 | 0  | 94.12 |
| chr9  | 71764733  | 71764766  | chr11 | 55586131  | 55586164  | 34 |  | 34 | 0 | 0  | 100   |
| chrX  | 54699580  | 54699613  | chrX  | 55991202  | 55991235  | 34 |  | 34 | 0 | 0  | 94.12 |
| chr1  | 21806481  | 21806514  | chr1  | 22148076  | 22148107  | 34 |  | 32 | 0 | 0  | 96.88 |
| chr1  | 220551575 | 220551607 | chr1  | 204359251 | 204359283 | 33 |  | 33 | 0 | 0  | 96.97 |
| chr6  | 114090698 | 114090730 | chr5  | 116415376 | 116415408 | 33 |  | 33 | 0 | 0  | 96.97 |
| chrX  | 56220198  | 56220230  | chrX  | 57642039  | 57642071  | 33 |  | 33 | 0 | 0  | 93.94 |
| chrX  | 152412735 | 152412767 | chrX  | 157473694 | 157473726 | 33 |  | 33 | 0 | 0  | 96.97 |
| chr12 | 55018042  | 55018073  | chr10 | 56269738  | 56269769  | 32 |  | 32 | 0 | 0  | 96.88 |
| chr13 | 100734798 | 100734828 | chr14 | 84071654  | 84071684  | 31 |  | 31 | 0 | 0  | 96.77 |
| chr2  | 62105635  | 62105665  | chr12 | 64322732  | 64322762  | 31 |  | 31 | 0 | 0  | 100   |
| chr9  | 107319504 | 107319534 | chr11 | 91785749  | 91785779  | 31 |  | 31 | 0 | 0  | 93.55 |
| chr11 | 1562812   | 1562841   | chr9  | 1750987   | 1751016   | 30 |  | 30 | 0 | 0  | 96.66 |
| chr3  | 38647712  | 38647741  | chr2  | 39750404  | 39750433  | 30 |  | 30 | 0 | 0  | 100   |
| chr4  | 136671147 | 136671176 | chr3  | 153716686 | 153716715 | 30 |  | 30 | 0 | 0  | 100   |
| chr7  | 143223639 | 143223668 | chr6  | 145973634 | 145973663 | 30 |  | 30 | 0 | 0  | 96.67 |
| chr10 | 71123689  | 71123717  | chr8  | 72283257  | 72283286  | 29 |  | 30 | 0 | 0  | 96.55 |
| chr13 | 113932615 | 113932643 | chr14 | 97584250  | 97584278  | 29 |  | 29 | 0 | 0  | 82.76 |
| chr4  | 34391479  | 34391507  | chr3  | 34794727  | 34794755  | 29 |  | 29 | 0 | 0  | 89.66 |
| chr5  | 159864771 | 159864799 | chr4  | 167044302 | 167044330 | 29 |  | 29 | 0 | 89 | 93.1  |
| chr6  | 39374545  | 39374572  | chr5  | 39938099  | 39938126  | 28 |  | 28 | 0 | 0  | 100   |
| chr9  | 87934243  | 87934270  | chr11 | 71931102  | 71931129  | 28 |  | 28 | 0 | 0  | 92.86 |
| chr7  | 39356827  | 39356853  | chr6  | 45163135  | 45163163  | 27 |  | 29 | 0 | 0  | 100   |
| chr10 | 36670667  | 36670693  | chr8  | 37197747  | 37197773  | 27 |  | 27 | 0 | 0  | 92.59 |
| chr6  | 133940110 | 133940136 | chr5  | 136581153 | 136581179 | 27 |  | 27 | 0 | 0  | 92.59 |
| chr2  | 135518286 | 135518311 | chr13 | 24508333  | 24508358  | 26 |  | 26 | 0 | 0  | 100   |
| chr9  | 8188514   | 8188539   | chr11 | 8114781   | 8114806   | 26 |  | 26 | 0 | 0  | 100   |
| chr1  | 215324644 | 215324667 | chr1  | 199073762 | 199073785 | 24 |  | 24 | 0 | 0  | 95.83 |
| chr10 | 19802073  | 19802096  | chr8  | 19945482  | 19945505  | 24 |  | 24 | 0 | 0  | 95.83 |
| chr2  | 108336369 | 108336392 | chr12 | 116087240 | 116087263 | 24 |  | 24 | 0 | 0  | 100   |
| chr3  | 30797191  | 30797214  | chr2  | 31779002  | 31779025  | 24 |  | 24 | 0 | 0  | 100   |
| chr9  | 8188547   | 8188570   | chr11 | 8114750   | 8114773   | 24 |  | 24 | 0 | 0  | 100   |
| chr19 | 38699394  | 38699416  | chr20 | 35215146  | 35215168  | 23 |  | 23 | 0 | 0  | 91.3  |

**Table S1**

**A list of all 1576 variants that were identified between the chimpanzee and human assemblies, after applying filtering criteria**

The column "% Dup Coverage" shows the fraction of each inversion region that is covered by segmental duplications.

The column "% Repeat Coverage" shows the fraction of each inversion region that is covered by repeats as defined by RepeatMasker.

Some larger inversions are fragmented in the chimpanzee assembly. See Table S2A for a curated list of inversions >25kb.
