# Supplementary material for: Discovery of Human Inversion Polymorphisms by Comparative Analysis of Human and Chimpanzee DNA Sequence Assemblies
Source: PLoS Genet. 2005 Oct 28;1(4):e56. doi: 10.1371/journal.pgen.0010056 (PMC1270012; doi:10.1371/journal.pgen.0010056)
Supplement: Table S3 — (24 KB XLS) [file pgen.0010056.st003.xls]

## Sheet: Literature Search
Published Large Human/Chimp Pericentric Inversions
Human Chr	Span Clone	Accession	Hs Start	Hs End		Chimp Chr	Clone	Accession	Pt Start	Pt End	Author	Pubmed
1p	no molecular data	-	-	-		1p	no molecular data	-	-	-	Szamalek et al.	unpublished
1q	no molecular data	-	-	-		1q	no molecular data	-	-	-
2q13	RP11-395L14	fusion site	114076908	114076923		12p	no molecular data	-	-	-	Hillier et al	15815621
						13p	no molecular data	-	-	-
4p14	RP11-779N22	AC110811	44656078	44677181		3p	RP43-59P20	AY335550	47354981	47362096	Kehrer-Sawatzki et al	15580561
4q21.3	RP11-8N8	AC108021	86174177	86360148		3q	RP43-41D24	AY335551	102310220	102314509
5p	RP11-35A11	AC113389	18589070	18589078		4p	RP43-001C16	AG141160; AG141159	19219894	19219897	Szamalek et al. (2005)	15883840
5q	RP11-432G16	AC104125	95947182	95947192		4q	RP43-023F21	AG158210; AG158209	101743160	101743174
9p11-12	RP11-100J16 to RP11-104G3	AL954139 to BX664615	41415897	41917754		11p	RP43-163C1	AY569337	(11 random) 20,542,786	(11 random) 21,193,646	Kehrer-Sawatzki et al	15820305
9q21.33	RP11-280P22 to RP11-359J6	AL450106 to AL158828	85981350	86442964		11q	RP43-156H15	AY805113	70143785	70148794
12p12.2	RP11-80N2	AC011604	20833482	21009087		10p	RP43-77C18	AC006582	68134012	68320104	Kehrer-Sawatzki et al	15545720
12q15	GSHB-410F4	AC005294	66627151	66740912		10q	RP43-135M19	AC007214	68188387	68343072
15cen	no molecular data	-	17000001	18300000		16cen	no molecular data	-	15260001	18260000	Locke et al	12914658
15q13.1	RP11-932O9 to RP11-382B18	AC120045 to AC019322	28097023	28557286		16q	PTB-108F2	AG104412, AG104411	29812901	30106589
17q21.3	RP5-1029K10	AC006487	44918039	45104642		19p	RP43-141Q35	AF503579	(19 random) 43,862,127	(19 random) 43,870,661	Kehrer-Sawatzki et al	12094327
17p13	RP1-179H24	AF503578	7868374	7879853		19q	RP43-134L13	AY117035	(19 random) 30,574,665	(19 random) 30,583,482
18p11.3	RP11-683L23	AP001005	5982	142961		17p	PTB-50A7	AG061845, AG061846	2052619	2188736	Goidts et al	15133654
18q11	RP11-666N19	AC036178	16764897	16900536		17q	RP43-56O1	AG183403, AG183404	12517523	12700715
Tale S3
Overview of all inversions between human and chimpanzee that have been previously published.
16p	no molecular data	-	-	-		18p	no molecular data	-	-	-	Goidts et al	in press
16q	no molecular data	-	-	-		18q	no molecular data	-	-	-
